# Supplementary material
Source: publisher site journal article supplement (https://www.spandidos-publications.com/7323/downloadSupplementary)
Supplement: Supplementary file 1 [file downloadSupplementary]

## Sheet: Table S5
Table SV. Differentially expressed genes between thyroid cancer samples and normal thyroid samples.
	logFC	AveExpr	t	P.Value	adj.P.Val	B	gene_symbol	group
RELN	-2.02821	0.573094	-27.6472	2.1408e-107	1.27221e-102	234.401	RELN	down
GRIA1	-0.247693	0.0487422	-27.5772	4.90293e-107	1.45683e-102	233.577	GRIA1	no
UGT2B11	-1.14108	0.283659	-27.2498	2.36896e-105	4.69267e-101	229.718	UGT2B11	down
LINC01834	-1.3234	0.231413	-27.076	1.86196e-104	2.76626e-100	227.666	LINC01834	down
KCNA1	-1.33979	0.263843	-25.1437	1.84351e-94	2.19109e-90	204.761	KCNA1	down
ABCA9	-1.62368	0.678819	-25.1269	2.2538e-94	2.23228e-90	204.561	ABCA9	down
AC137056.1	-0.365999	0.0653412	-24.6332	8.23419e-92	6.99047e-88	198.688	AC137056.1	no
IGSF10	-1.37495	0.437037	-24.428	9.58396e-91	7.11933e-87	196.245	IGSF10	down
RPA3P2	-1.04164	0.164945	-24.315	3.6999e-90	2.44304e-86	194.901	RPA3P2	down
LINC02580	-1.2205	0.513763	-24.2578	7.33609e-90	4.35962e-86	194.22	LINC02580	down
RPS6KA5	-1.03572	0.824723	-24.0195	1.26916e-88	6.85659e-85	191.382	RPS6KA5	down
AC108075.1	-1.05398	0.206119	-23.6852	6.92846e-87	3.43115e-83	187.401	AC108075.1	down
KCNIP4	-1.20936	0.433206	-23.2057	2.14748e-84	9.81679e-81	181.691	KCNIP4	down
MPPED2-AS1	-1.72325	0.515576	-22.977	3.30773e-83	1.40406e-79	178.969	MPPED2-AS1	down
AL034374.1	-2.53953	1.55067	-22.8271	1.98581e-82	7.86739e-79	177.185	AL034374.1	down
SNORD13	-2.31864	0.610802	-22.7623	4.3082e-82	1.60014e-78	176.414	SNORD13	down
TFF2	-2.80927	0.789957	-22.5967	3.11546e-81	1.08907e-77	174.445	TFF2	down
RYR2	-2.61692	1.12407	-22.3358	7.02665e-80	2.31985e-76	171.343	RYR2	down
ADH1B	-2.58551	0.923063	-21.9632	6.0007e-78	1.87686e-74	166.916	ADH1B	down
FAM180B	-2.75189	0.985456	-21.9072	1.16991e-77	3.47622e-74	166.252	FAM180B	down
TSPAN19	-0.686836	0.161438	-21.8785	1.64707e-77	4.66096e-74	165.911	TSPAN19	down
CDHR3	-1.36553	0.883498	-21.866	1.91032e-77	5.1602e-74	165.764	CDHR3	down
AL512658.2	-1.5635	0.613483	-21.8372	2.69352e-77	6.95946e-74	165.422	AL512658.2	down
AC016571.1	-0.539408	0.160813	-21.8021	4.09126e-77	1.01305e-73	165.006	AC016571.1	down
VIT	-1.89427	0.578333	-21.742	8.37671e-77	1.99121e-73	164.292	VIT	down
ADD3-AS1	-0.357845	0.228697	-21.7164	1.136e-76	2.52865e-73	163.989	ADD3-AS1	no
AC006305.1	-1.50465	0.567329	-21.7155	1.14886e-76	2.52865e-73	163.978	AC006305.1	down
LINC02668	-0.137059	0.034257	-21.6788	1.77885e-76	3.77542e-73	163.543	LINC02668	no
AC007920.2	-0.511895	0.142568	-21.6686	2.00979e-76	4.11848e-73	163.421	AC007920.2	down
AF111167.1	-0.825011	0.20347	-21.5606	7.27409e-76	1.44092e-72	162.141	AF111167.1	down
MMRN1	-3.18105	2.02493	-21.4921	1.64276e-75	3.14918e-72	161.33	MMRN1	down
LYVE1	-2.93475	2.11977	-21.4444	2.89888e-75	5.38348e-72	160.765	LYVE1	down
GPC3	-3.17927	1.66864	-21.3505	8.85497e-75	1.59462e-71	159.653	GPC3	down
LINC01532	-0.355735	0.0955312	-21.3033	1.55213e-74	2.71289e-71	159.094	LINC01532	no
AADACP1	-2.09461	0.775239	-21.2519	2.86271e-74	4.86064e-71	158.485	AADACP1	down
MAN1A2P1	-1.20361	0.337496	-21.2085	4.79357e-74	7.91298e-71	157.972	MAN1A2P1	down
AL390726.5	-1.46801	0.439567	-21.1163	1.43398e-73	2.30316e-70	156.881	AL390726.5	down
KLHL4	-1.03003	0.476989	-21.0224	4.37046e-73	6.83482e-70	155.772	KLHL4	down
PID1	-2.24165	1.46316	-21.0131	4.88119e-73	7.43781e-70	155.662	PID1	down
DDX25	-1.22537	0.671611	-21.0065	5.28185e-73	7.84711e-70	155.583	DDX25	down
AL353699.1	-1.39137	0.378815	-20.9859	6.74443e-73	9.77564e-70	155.34	AL353699.1	down
AC012433.2	-1.38258	0.384059	-20.9783	7.38109e-73	1.04437e-69	155.25	AC012433.2	down
RNU5F-1	-2.66483	0.954457	-20.9668	8.46057e-73	1.16927e-69	155.114	RNU5F-1	down
MYH15	-0.597019	0.187346	-20.9106	1.64842e-72	2.22638e-69	154.451	MYH15	down
RASSF9	-2.12657	1.43177	-20.8882	2.15055e-72	2.84001e-69	154.186	RASSF9	down
AL161640.2	-0.497365	0.136474	-20.8652	2.82537e-72	3.65008e-69	153.914	AL161640.2	no
LRP1B	-2.68528	0.95464	-20.7029	1.93523e-71	2.44691e-68	151.999	LRP1B	down
ADH1C	-1.18702	0.436659	-20.684	2.41913e-71	2.99504e-68	151.777	ADH1C	down
SRARP	-0.872195	0.225897	-20.662	3.14106e-71	3.80947e-68	151.517	SRARP	down
NRXN1	-0.17025	0.0378952	-20.6066	6.05501e-71	7.19662e-68	150.864	NRXN1	no
RNVU1-29	-1.63109	0.537652	-20.5308	1.48439e-70	1.72967e-67	149.971	RNVU1-29	down
TCEAL5	-2.86718	1.26675	-20.4402	4.34016e-70	4.96006e-67	148.903	TCEAL5	down
RNU2-63P	-1.3472	0.325503	-20.4122	6.04136e-70	6.77396e-67	148.574	RNU2-63P	down
LINC01905	-0.461295	0.129503	-20.2854	2.70375e-69	2.97548e-66	147.082	LINC01905	no
AC109782.1	-0.563092	0.22275	-20.2747	3.06667e-69	3.31351e-66	146.957	AC109782.1	down
RNA5SP470	-1.17116	0.276717	-20.254	3.91798e-69	4.15775e-66	146.713	RNA5SP470	down
STAB2	-0.92411	0.264164	-20.2367	4.80822e-69	5.01295e-66	146.509	STAB2	down
LRRN4CL	-1.9913	0.840725	-20.1453	1.41472e-68	1.44953e-65	145.435	LRRN4CL	down
EYA1	-0.45099	0.148825	-20.1059	2.25193e-68	2.26823e-65	144.973	EYA1	no
AC010226.1	-1.24475	1.06874	-20.0481	4.44809e-68	4.40562e-65	144.295	AC010226.1	down
AL445220.1	-1.23311	0.357859	-20.0419	4.78677e-68	4.66333e-65	144.222	AL445220.1	down
DLG2	-2.40094	1.44781	-19.994	8.42594e-68	8.07626e-65	143.659	DLG2	down
KCTD16	-1.32939	0.411768	-19.9549	1.33574e-67	1.25998e-64	143.201	KCTD16	down
AC087175.1	-0.66273	0.30824	-19.953	1.36586e-67	1.26827e-64	143.178	AC087175.1	down
TMEM174	-0.556108	0.11722	-19.9405	1.58225e-67	1.44659e-64	143.032	TMEM174	down
AC078899.4	-2.35875	0.968675	-19.9368	1.65307e-67	1.48844e-64	142.988	AC078899.4	down
TFF1	-2.61061	0.858045	-19.9137	2.16955e-67	1.92432e-64	142.718	TFF1	down
Z93241.1	-0.834455	0.254314	-19.9057	2.38351e-67	2.08301e-64	142.624	Z93241.1	down
LINC01672	-0.701499	0.24251	-19.8711	3.58363e-67	3.08644e-64	142.218	LINC01672	down
LNCNEF	-2.55612	0.912799	-19.8267	6.03964e-67	5.12739e-64	141.699	LNCNEF	down
AC046195.1	-0.938947	0.225233	-19.8129	7.10165e-67	5.94408e-64	141.538	AC046195.1	down
AC092127.2	-1.34509	0.575237	-19.8042	7.86968e-67	6.49543e-64	141.435	AC092127.2	down
LINC01697	-0.196859	0.0449429	-19.7964	8.62998e-67	7.02539e-64	141.344	LINC01697	no
LINC02308	-1.05171	0.345933	-19.7844	9.93814e-67	7.981e-64	141.203	LINC02308	down
AC109326.1	-1.84399	1.49251	-19.7653	1.24429e-66	9.85927e-64	140.979	AC109326.1	down
AP000802.1	-0.838698	0.307047	-19.7358	1.75911e-66	1.37551e-63	140.635	AP000802.1	down
ESRRAP2	-0.384848	0.161587	-19.7318	1.84379e-66	1.423e-63	140.588	ESRRAP2	no
F10	-1.93694	1.34085	-19.699	2.71324e-66	2.04666e-63	140.203	F10	down
PLA2R1	-3.23302	2.87063	-19.6987	2.72075e-66	2.04666e-63	140.201	PLA2R1	down
RPS23P1	-1.32608	0.654403	-19.6544	4.58329e-66	3.40464e-63	139.682	RPS23P1	down
LINC01695	-0.164304	0.0500881	-19.6303	6.08126e-66	4.46162e-63	139.4	LINC01695	no
CNTN5	-1.8516	0.734451	-19.6095	7.76594e-66	5.62813e-63	139.157	CNTN5	down
DPT	-4.01539	2.05811	-19.5949	9.22117e-66	6.60225e-63	138.986	DPT	down
LINC01354	-1.18181	0.561497	-19.5829	1.06125e-65	7.45098e-63	138.846	LINC01354	down
ATP2C2	-2.42416	1.46558	-19.5825	1.06573e-65	7.45098e-63	138.842	ATP2C2	down
AC078882.1	-1.89726	0.775121	-19.4802	3.54054e-65	2.44656e-62	137.647	AC078882.1	down
SLC17A7	-0.875294	0.524459	-19.4219	7.01567e-65	4.79219e-62	136.966	SLC17A7	down
SNX18P3	-1.2893	0.791969	-19.4168	7.44461e-65	5.02739e-62	136.907	SNX18P3	down
SREBF2-AS1	-0.296038	0.164884	-19.3961	9.4911e-65	6.31267e-62	136.665	SREBF2-AS1	no
AL160286.1	-0.81454	0.31028	-19.3955	9.56031e-65	6.31267e-62	136.658	AL160286.1	down
LINC02432	-1.2283	0.663756	-19.3757	1.20586e-64	7.8748e-62	136.427	LINC02432	down
AL138767.3	-1.27929	0.45059	-19.3601	1.44813e-64	9.35415e-62	136.245	AL138767.3	down
SNORD3B-2	-1.0788	0.267505	-19.3342	1.96169e-64	1.25352e-61	135.943	SNORD3B-2	down
ACKR2	-1.01992	0.701255	-19.3088	2.6405e-64	1.66933e-61	135.647	ACKR2	down
SCARA5	-3.23966	1.27204	-19.2908	3.25837e-64	2.03827e-61	135.438	SCARA5	down
ZNF804B	-2.8589	0.981998	-19.233	6.41205e-64	3.96926e-61	134.764	ZNF804B	down
AC007998.3	-1.08506	0.585789	-19.2243	7.096e-64	4.34736e-61	134.663	AC007998.3	down
GSTM5	-1.62706	0.898718	-19.1853	1.11978e-63	6.79033e-61	134.209	GSTM5	down
AC110296.1	-0.537122	0.143142	-19.1798	1.19442e-63	7.16979e-61	134.145	AC110296.1	down
AC009237.9	-1.59499	0.661902	-19.1513	1.66556e-63	9.89791e-61	133.814	AC009237.9	down
MASP1	-0.705081	0.249262	-19.105	2.86125e-63	1.68352e-60	133.276	MASP1	down
IPCEF1	-3.58988	2.56432	-19.0888	3.45886e-63	2.01519e-60	133.087	IPCEF1	down
RNVU1-27	-1.97039	0.91776	-19.0559	5.08003e-63	2.93098e-60	132.704	RNVU1-27	down
LINC01539	-1.14361	0.454693	-18.9897	1.09983e-62	6.28458e-60	131.936	LINC01539	down
C6	-0.995084	0.340537	-18.9612	1.53453e-62	8.68502e-60	131.604	C6	down
AC104985.1	-0.766717	0.194303	-18.9548	1.65375e-62	9.27145e-60	131.53	AC104985.1	down
AL031123.5	-1.49902	0.608984	-18.9502	1.74385e-62	9.6852e-60	131.477	AL031123.5	down
SLC6A15	-0.618103	0.111661	-18.893	3.39791e-62	1.8697e-59	130.813	SLC6A15	down
GPM6A	-2.54417	1.61242	-18.8866	3.66215e-62	1.99661e-59	130.738	GPM6A	down
GLI1	-1.08408	0.51143	-18.8846	3.74773e-62	2.02469e-59	130.715	GLI1	down
AC068672.2	-1.03635	0.216448	-18.8419	6.1632e-62	3.29964e-59	130.22	AC068672.2	down
FGF10	-1.29531	0.380063	-18.8027	9.72912e-62	5.16225e-59	129.766	FGF10	down
C8orf88	-1.96651	1.39242	-18.7952	1.06087e-61	5.57916e-59	129.68	C8orf88	down
C9orf92	-1.17317	0.511701	-18.7817	1.24225e-61	6.47572e-59	129.523	C9orf92	down
RPL12P30	-1.56512	0.638482	-18.78	1.26683e-61	6.54642e-59	129.503	RPL12P30	down
SERINC2	1.66454	7.12602	18.763	1.54453e-61	7.91268e-59	129.306	SERINC2	up
AOX1	-3.02667	1.68206	-18.6573	5.27859e-61	2.68112e-58	128.083	AOX1	down
MAPK4	-2.84832	1.36504	-18.6396	6.48458e-61	3.26575e-58	127.878	MAPK4	down
GPR142	-1.07954	0.31425	-18.6358	6.77891e-61	3.38529e-58	127.834	GPR142	down
RNU5D-1	-1.71418	0.524045	-18.6278	7.43302e-61	3.68102e-58	127.743	RNU5D-1	down
PTP4A3	1.77308	5.64616	18.5559	1.71411e-60	8.41852e-58	126.911	PTP4A3	up
ANKS1B	-1.39734	1.08954	-18.5458	1.92638e-60	9.38353e-58	126.795	ANKS1B	down
AC104232.1	-0.585682	0.284312	-18.5048	3.10131e-60	1.49839e-57	126.321	AC104232.1	down
SYT9	-1.38908	0.696976	-18.4927	3.56798e-60	1.70995e-57	126.181	SYT9	down
AC006305.3	-0.962073	0.373231	-18.4633	5.01618e-60	2.38477e-57	125.842	AC006305.3	down
RNU1-1	-0.741381	0.128461	-18.4144	8.84306e-60	4.17077e-57	125.278	RNU1-1	down
KLHDC8A	3.96619	4.59889	18.3883	1.19607e-59	5.59675e-57	124.978	KLHDC8A	up
LINC02884	-0.87345	0.412622	-18.3802	1.3133e-59	6.09732e-57	124.885	LINC02884	down
SAMMSON	-0.0960966	0.0278461	-18.3565	1.72836e-59	7.96211e-57	124.611	SAMMSON	no
DBX2	-0.305454	0.080198	-18.3451	1.97082e-59	9.00921e-57	124.481	DBX2	no
ETV4	3.07422	4.91945	18.3335	2.25444e-59	1.02271e-56	124.347	ETV4	up
MYOC	-3.32511	1.22848	-18.3317	2.30224e-59	1.03648e-56	124.326	MYOC	down
PCAT14	-1.01436	0.322261	-18.3039	3.17634e-59	1.41925e-56	124.006	PCAT14	down
AC117500.1	-0.690172	0.18777	-18.2736	4.5069e-59	1.99874e-56	123.658	AC117500.1	down
AL121950.1	-0.138541	0.0257312	-18.2422	6.48352e-59	2.85405e-56	123.296	AL121950.1	no
PAPSS2	-2.73139	3.25188	-18.2202	8.36166e-59	3.65374e-56	123.043	PAPSS2	down
AC135584.1	-3.24587	1.31902	-18.2061	9.83407e-59	4.26576e-56	122.881	AC135584.1	down
CFAP299	-0.296512	0.127531	-18.1721	1.45688e-58	6.27379e-56	122.49	CFAP299	no
DPP6	-3.35937	1.53719	-18.1579	1.71507e-58	7.33249e-56	122.328	DPP6	down
LIPH	4.44158	4.78656	18.1511	1.85643e-58	7.88016e-56	122.249	LIPH	up
METTL7B	3.69188	6.47497	18.1025	3.25339e-58	1.3712e-55	121.691	METTL7B	up
AP003548.1	-0.737217	0.221691	-18.0377	6.86254e-58	2.87198e-55	120.948	AP003548.1	down
PBX4	-2.37101	2.99	-18.0335	7.20193e-58	2.99293e-55	120.9	PBX4	down
RASSF6	-2.17193	1.23721	-18.0173	8.68395e-58	3.58376e-55	120.714	RASSF6	down
AKR1E2	-1.62185	1.17696	-18.0094	9.51152e-58	3.89822e-55	120.623	AKR1E2	down
LINC01975	-1.89898	0.689221	-17.9976	1.08918e-57	4.43334e-55	120.488	LINC01975	down
BBC3	1.76275	3.86849	17.9799	1.33578e-57	5.40008e-55	120.285	BBC3	up
AL359915.1	-0.367069	0.133495	-17.9725	1.45431e-57	5.83954e-55	120.201	AL359915.1	no
ODAM	-2.53318	0.964994	-17.944	2.01951e-57	8.05458e-55	119.874	ODAM	down
AGPAT4	-1.34755	1.16488	-17.9107	2.96033e-57	1.17283e-54	119.493	AGPAT4	down
LINC02660	-0.515752	0.138361	-17.9008	3.31854e-57	1.30603e-54	119.38	LINC02660	down
LINC01785	-0.568479	0.110115	-17.8947	3.55703e-57	1.39068e-54	119.311	LINC01785	down
LINC02532	-0.314196	0.159166	-17.8559	5.56224e-57	2.16044e-54	118.866	LINC02532	no
DCDC1	-0.618839	0.374595	-17.8181	8.58355e-57	3.3123e-54	118.434	DCDC1	down
RNU5A-1	-1.76739	0.722584	-17.8057	9.89302e-57	3.79298e-54	118.293	RNU5A-1	down
RADIL	-1.46107	0.867702	-17.8028	1.02282e-56	3.89636e-54	118.26	RADIL	down
AC011270.2	-0.88577	0.309709	-17.7881	1.21097e-56	4.58373e-54	118.092	AC011270.2	down
AC073529.1	-0.382098	0.278859	-17.7727	1.44592e-56	5.43839e-54	117.915	AC073529.1	no
SOX5	-0.94714	0.691743	-17.728	2.41345e-56	9.02039e-54	117.406	SOX5	down
NOL4	-1.67907	0.669615	-17.7258	2.47441e-56	9.19041e-54	117.381	NOL4	down
VN1R48P	-0.622373	0.160378	-17.6908	3.69517e-56	1.36393e-53	116.982	VN1R48P	down
RNVU1-2A	-0.96053	0.195076	-17.6611	5.19746e-56	1.9066e-53	116.642	RNVU1-2A	down
AL357146.1	-0.89898	0.519822	-17.6575	5.41272e-56	1.97339e-53	116.602	AL357146.1	down
PHLDA3	1.72719	6.03305	17.638	6.76518e-56	2.45143e-53	116.38	PHLDA3	up
DLG2-AS2	-0.3158	0.0938709	-17.6351	6.99547e-56	2.51952e-53	116.347	DLG2-AS2	no
KLHL33	-0.385263	0.203092	-17.6318	7.27046e-56	2.60278e-53	116.308	KLHL33	no
AC104137.1	-1.73551	0.49597	-17.5189	2.6437e-55	9.40761e-53	115.024	AC104137.1	down
AL157911.1	-0.65727	0.276625	-17.5139	2.79992e-55	9.90421e-53	114.967	AL157911.1	down
AC093909.4	-0.162808	0.0338501	-17.504	3.13523e-55	1.10247e-52	114.854	AC093909.4	no
SLC6A3	-1.10644	0.461639	-17.4998	3.28964e-55	1.14996e-52	114.806	SLC6A3	down
HSD52	-0.301894	0.17719	-17.4239	7.82052e-55	2.71784e-52	113.945	HSD52	no
GOLT1A	3.14683	4.60207	17.4169	8.47628e-55	2.9286e-52	113.865	GOLT1A	up
C1QTNF7	-1.62784	1.05269	-17.3829	1.24879e-54	4.28971e-52	113.479	C1QTNF7	down
RORB	-0.838812	0.404971	-17.3488	1.84219e-54	6.2917e-52	113.092	RORB	down
LINC02158	-0.834203	0.508094	-17.3198	2.56381e-54	8.70626e-52	112.763	LINC02158	down
RNU6-2	-1.64786	0.650895	-17.3182	2.60909e-54	8.80968e-52	112.746	RNU6-2	down
EPHA6	-0.774	0.433154	-17.3007	3.18714e-54	1.07007e-51	112.547	EPHA6	down
EPHA5	-1.36462	0.421521	-17.2814	3.96685e-54	1.32437e-51	112.329	EPHA5	down
TBX22	-2.42145	1.07232	-17.2638	4.84946e-54	1.60999e-51	112.129	TBX22	down
SBSPON	-1.66724	1.33737	-17.2595	5.09364e-54	1.67914e-51	112.08	SBSPON	down
SEC14L3	-1.05014	0.280696	-17.2591	5.11425e-54	1.67914e-51	112.076	SEC14L3	down
ART4	-1.42355	0.804296	-17.252	5.54472e-54	1.81047e-51	111.996	ART4	down
GASAL1	-0.731029	0.571443	-17.2149	8.45109e-54	2.73069e-51	111.577	GASAL1	down
AC012101.2	-0.704081	0.227139	-17.2149	8.45485e-54	2.73069e-51	111.576	AC012101.2	down
PIK3C2G	-0.10371	0.0225958	-17.198	1.02497e-53	3.29247e-51	111.385	PIK3C2G	no
RNU1-2	-0.843258	0.202145	-17.1925	1.09051e-53	3.48418e-51	111.323	RNU1-2	down
AC026116.1	-2.91247	1.03912	-17.1881	1.14671e-53	3.64416e-51	111.273	AC026116.1	down
TPPP	-2.28582	2.80041	-17.1715	1.38457e-53	4.37665e-51	111.086	TPPP	down
OSR1	-1.37683	0.722929	-17.1645	1.49863e-53	4.71211e-51	111.007	OSR1	down
LINC02538	-0.11349	0.0385668	-17.1599	1.57949e-53	4.94023e-51	110.955	LINC02538	no
IMPDH1P9	-0.406419	0.164993	-17.1313	2.18482e-53	6.79776e-51	110.632	IMPDH1P9	no
CHRDL1	-3.75557	2.26899	-17.1251	2.34476e-53	7.2574e-51	110.562	CHRDL1	down
IFTAP	-1.88932	2.45835	-17.1177	2.5487e-53	7.84774e-51	110.479	IFTAP	down
KRT89P	-1.37015	0.668151	-17.1089	2.81873e-53	8.63446e-51	110.378	KRT89P	down
ADGRV1	-1.51083	0.800612	-17.1021	3.04402e-53	9.27678e-51	110.302	ADGRV1	down
SRCIN1	2.01281	2.5595	17.0806	3.88518e-53	1.17798e-50	110.059	SRCIN1	up
AC092850.2	-0.150023	0.0340653	-17.0635	4.71438e-53	1.42214e-50	109.867	AC092850.2	no
TNNT3	-1.56979	0.697815	-17.0238	7.39059e-53	2.21818e-50	109.419	TNNT3	down
ANK2	-2.16302	1.54537	-17.0041	9.2403e-53	2.75941e-50	109.197	ANK2	down
EPHA5-AS1	-1.20671	0.351796	-16.9985	9.84485e-53	2.92525e-50	109.134	EPHA5-AS1	down
NMNAT3	-0.892686	1.1	-16.9946	1.02971e-52	3.0444e-50	109.089	NMNAT3	down
AC007563.2	-0.4445	0.180528	-16.9937	1.03961e-52	3.05846e-50	109.08	AC007563.2	no
AC068880.4	-1.25988	0.750741	-16.9902	1.08233e-52	3.16845e-50	109.04	AC068880.4	down
AC007365.1	-1.26268	0.985471	-16.9755	1.27719e-52	3.72057e-50	108.875	AC007365.1	down
AGR3	-2.55067	1.23442	-16.9708	1.34742e-52	3.90601e-50	108.822	AGR3	down
ST7-AS1	-1.25204	1.52474	-16.9132	2.58579e-52	7.4595e-50	108.173	ST7-AS1	down
C6orf118	-0.608636	0.205383	-16.9098	2.68601e-52	7.71118e-50	108.136	C6orf118	down
AP000757.1	-1.21	0.626085	-16.9006	2.98185e-52	8.51934e-50	108.032	AP000757.1	down
FBXW10	-0.589427	0.262662	-16.8971	3.10136e-52	8.8184e-50	107.993	FBXW10	down
AP001178.3	-0.765029	0.435942	-16.8714	4.14717e-52	1.17359e-49	107.704	AP001178.3	down
SH2D6	-1.6763	0.874841	-16.8697	4.22574e-52	1.19016e-49	107.685	SH2D6	down
MLNR	-1.04245	0.404847	-16.8569	4.88514e-52	1.36938e-49	107.541	MLNR	down
AC002511.1	-1.04355	0.410834	-16.8493	5.32018e-52	1.48433e-49	107.456	AC002511.1	down
AC105052.5	-1.74579	1.43589	-16.8442	5.63701e-52	1.56538e-49	107.398	AC105052.5	down
AC078842.1	-1.00089	0.396335	-16.8412	5.83227e-52	1.61207e-49	107.364	AC078842.1	down
AC007952.4	-0.919251	0.323195	-16.8378	6.06029e-52	1.66205e-49	107.326	AC007952.4	down
SLC1A7	-0.7062	0.288349	-16.8376	6.06904e-52	1.66205e-49	107.325	SLC1A7	down
SLC5A5	-4.06287	1.60065	-16.8349	6.25661e-52	1.70556e-49	107.294	SLC5A5	down
GHR	-1.54292	1.46045	-16.8121	8.09816e-52	2.19749e-49	107.038	GHR	down
CFD	-2.48035	4.77668	-16.7907	1.03101e-51	2.78499e-49	106.798	CFD	down
KLK2	-1.71454	0.767566	-16.7791	1.17492e-51	3.15937e-49	106.668	KLK2	down
SEPHS1P6	-1.16674	0.659331	-16.7634	1.40255e-51	3.75447e-49	106.491	SEPHS1P6	down
NPC2	2.17594	10.3567	16.7593	1.46918e-51	3.9152e-49	106.445	NPC2	up
GFRA1	-1.75097	0.925248	-16.7211	2.25747e-51	5.98904e-49	106.018	GFRA1	down
ABCA10	-0.85464	0.640523	-16.6926	3.11187e-51	8.21907e-49	105.699	ABCA10	down
LPP-AS2	-0.967834	1.09481	-16.6747	3.8054e-51	1.00063e-48	105.499	LPP-AS2	down
AC116345.4	-1.22946	0.540707	-16.6517	4.93005e-51	1.29065e-48	105.241	AC116345.4	down
AL160286.2	-0.508923	0.207134	-16.6309	6.22815e-51	1.62334e-48	105.009	AL160286.2	down
CDH16	-4.49961	2.84904	-16.6297	6.31882e-51	1.63977e-48	104.994	CDH16	down
CLUL1	-1.45535	1.14923	-16.6277	6.46076e-51	1.66932e-48	104.972	CLUL1	down
LINC01140	-0.362763	0.24788	-16.6186	7.1535e-51	1.84031e-48	104.871	LINC01140	no
LYPLAL1-DT	-0.453089	0.390572	-16.6033	8.49318e-51	2.17554e-48	104.7	LYPLAL1-DT	no
EPHA3	-2.186	2.56895	-16.5906	9.805e-51	2.50078e-48	104.557	EPHA3	down
AC010425.1	-1.24301	0.339389	-16.5823	1.07513e-50	2.73041e-48	104.465	AC010425.1	down
AL122014.1	-0.198144	0.0389697	-16.5638	1.3242e-50	3.34866e-48	104.258	AL122014.1	no
AC106897.1	-0.645673	0.273933	-16.5217	2.12309e-50	5.34613e-48	103.789	AC106897.1	down
PLCH1	-2.28587	1.83039	-16.5115	2.3797e-50	5.96702e-48	103.675	PLCH1	down
AC112770.1	-0.202377	0.0507942	-16.4538	4.54777e-50	1.13555e-47	103.031	AC112770.1	no
ASXL3	-1.26026	0.545689	-16.4509	4.69333e-50	1.16699e-47	103	ASXL3	down
AC002306.1	-0.573616	0.267443	-16.4464	4.93584e-50	1.22218e-47	102.949	AC002306.1	down
EPHB1	-2.16213	2.15908	-16.4416	5.20841e-50	1.28431e-47	102.896	EPHB1	down
PTPRQ	-1.21971	0.50458	-16.4315	5.83321e-50	1.43244e-47	102.783	PTPRQ	down
RPL7P29	-0.229172	0.058696	-16.419	6.71232e-50	1.64154e-47	102.644	RPL7P29	no
GALE	2.56364	5.42572	16.3995	8.3479e-50	2.03316e-47	102.427	GALE	up
RNU5B-1	-1.27331	0.407835	-16.3713	1.14439e-49	2.77582e-47	102.113	RNU5B-1	down
PMP2	-0.320395	0.0674157	-16.3689	1.1759e-49	2.84066e-47	102.086	PMP2	no
AC148477.2	-0.889559	0.382905	-16.3452	1.53134e-49	3.68434e-47	101.823	AC148477.2	down
LINC02028	-0.700269	0.441594	-16.3429	1.57177e-49	3.76636e-47	101.797	LINC02028	down
LRRIQ1	-0.981624	0.900139	-16.3323	1.76838e-49	4.22047e-47	101.68	LRRIQ1	down
TFCP2L1	-3.52197	3.09721	-16.3235	1.95134e-49	4.6385e-47	101.582	TFCP2L1	down
AC021979.2	-0.803821	0.203844	-16.3162	2.1178e-49	5.01412e-47	101.501	AC021979.2	down
AL513303.1	-0.72138	0.278928	-16.3113	2.23581e-49	5.27251e-47	101.447	AL513303.1	down
AP002954.2	-1.07963	0.705819	-16.3078	2.32545e-49	5.46222e-47	101.408	AP002954.2	down
ARMC8P1	-0.288361	0.069498	-16.2988	2.57186e-49	6.01725e-47	101.308	ARMC8P1	no
RNU4ATAC9P	-0.76942	0.146522	-16.2903	2.8263e-49	6.58661e-47	101.214	RNU4ATAC9P	down
NLGN1	-0.580119	0.22397	-16.285	2.99954e-49	6.96304e-47	101.155	NLGN1	down
AC068896.1	-0.734062	0.549105	-16.2766	3.29405e-49	7.61696e-47	101.061	AC068896.1	down
LAYN	-2.09971	3.37092	-16.2532	4.27702e-49	9.85157e-47	100.802	LAYN	down
HAP1	-1.69883	1.05174	-16.2387	5.02783e-49	1.15362e-46	100.641	HAP1	down
TNP1	-0.821034	0.246664	-16.2364	5.15903e-49	1.17917e-46	100.615	TNP1	down
CECR2	-1.25066	0.622148	-16.2116	6.80154e-49	1.54864e-46	100.34	CECR2	down
TFF3	-5.98576	5.87458	-16.1919	8.47138e-49	1.92148e-46	100.122	TFF3	down
SNORD3B-1	-1.26515	0.372368	-16.1904	8.61568e-49	1.94678e-46	100.105	SNORD3B-1	down
RNVU1-4	-1.65376	0.951561	-16.1585	1.22853e-48	2.76545e-46	99.7523	RNVU1-4	down
NAMA	-0.223004	0.104062	-16.1579	1.23693e-48	2.77385e-46	99.7455	NAMA	no
AC104232.3	-0.647697	0.446987	-16.1391	1.52386e-48	3.40446e-46	99.538	AC104232.3	down
GPR182	-0.744527	0.32427	-16.103	2.27705e-48	5.06811e-46	99.1385	GPR182	down
LINC02066	-0.233658	0.0433453	-16.0993	2.37231e-48	5.26043e-46	99.0978	LINC02066	no
ZFPM2	-1.93845	1.86049	-16.092	2.57234e-48	5.68276e-46	99.0173	ZFPM2	down
RNVU1-15	-1.57543	1.13796	-16.091	2.60321e-48	5.72966e-46	99.0054	RNVU1-15	down
LRIG1	-1.62715	3.9617	-16.0754	3.09549e-48	6.78803e-46	98.8331	LRIG1	down
LINC01589	-0.589844	0.200179	-16.07	3.28628e-48	7.17993e-46	98.7737	LINC01589	down
SYNE1-AS1	-0.802115	0.324955	-16.0619	3.59616e-48	7.82817e-46	98.684	SYNE1-AS1	down
AP000880.1	-0.482506	0.339869	-16.0562	3.8277e-48	8.30178e-46	98.622	AP000880.1	no
LRRC7	-0.803705	0.482677	-16.0357	4.80752e-48	1.0389e-45	98.3953	LRRC7	down
PRR36	2.25897	3.43399	16.024	5.4753e-48	1.17891e-45	98.266	PRR36	up
OCA2	-2.78404	1.66777	-16.0216	5.61908e-48	1.20551e-45	98.2402	OCA2	down
LRP4	3.56184	5.49912	16.0211	5.65257e-48	1.20833e-45	98.2343	LRP4	up
ART5	-1.66399	1.22919	-16.0138	6.1298e-48	1.30565e-45	98.1537	ART5	down
AL050338.2	-1.14625	0.915421	-16.012	6.25419e-48	1.32739e-45	98.1337	AL050338.2	down
AL049757.1	-0.432579	0.181312	-16.0019	6.99625e-48	1.47959e-45	98.0222	AL049757.1	no
AADACL2-AS1	-0.557921	0.147406	-15.9976	7.33318e-48	1.54535e-45	97.9754	AADACL2-AS1	down
TMEM171	-2.69494	4.24028	-15.9972	7.36856e-48	1.54732e-45	97.9706	TMEM171	down
LMOD1	-2.66429	4.07425	-15.9897	8.0038e-48	1.6748e-45	97.8884	LMOD1	down
FTCDNL1	-1.59181	2.29502	-15.9725	9.69371e-48	2.02129e-45	97.6979	FTCDNL1	down
CLMN	-1.56745	1.74923	-15.9576	1.1422e-47	2.37335e-45	97.5347	CLMN	down
RXRG	4.55992	5.60601	15.9552	1.17408e-47	2.43108e-45	97.5073	RXRG	up
AC002383.1	-0.811907	0.263299	-15.951	1.22949e-47	2.53698e-45	97.4614	AC002383.1	down
HTR1E	-1.15835	0.412111	-15.9378	1.42239e-47	2.92485e-45	97.3165	HTR1E	down
SERPINA5	-1.46788	0.507173	-15.926	1.62071e-47	3.32117e-45	97.1867	SERPINA5	down
GDF15	3.66801	6.20648	15.9244	1.65114e-47	3.37191e-45	97.1682	GDF15	up
SLC25A33	-1.47509	2.61723	-15.9075	1.99041e-47	4.05083e-45	96.9824	SLC25A33	down
RNU4ATAC	-2.39279	1.35537	-15.8919	2.36438e-47	4.7955e-45	96.8111	RNU4ATAC	down
MRO	-2.66163	1.47789	-15.8861	2.52189e-47	5.09756e-45	96.747	MRO	down
PROX1	-2.07495	2.03736	-15.8836	2.59246e-47	5.22244e-45	96.7195	PROX1	down
ADAM33	-1.45026	1.18152	-15.8687	3.057e-47	6.13744e-45	96.5556	ADAM33	down
AC093599.2	-1.37083	1.88935	-15.8573	3.46686e-47	6.93687e-45	96.4305	AC093599.2	down
TFPI	-1.39003	1.93762	-15.8521	3.67277e-47	7.32421e-45	96.3731	TFPI	down
TRIM47	1.39654	5.08414	15.8447	3.98232e-47	7.91496e-45	96.2927	TRIM47	up
PGPEP1L	-0.259765	0.11015	-15.8439	4.02078e-47	7.96477e-45	96.2831	PGPEP1L	no
SCG3	-0.911329	0.463338	-15.8334	4.51271e-47	8.90953e-45	96.1683	SCG3	down
FOXP2	-1.65111	1.18156	-15.8276	4.81037e-47	9.46577e-45	96.1048	FOXP2	down
DNM1P47	-0.152398	0.0796498	-15.8159	5.47723e-47	1.07424e-44	95.9757	DNM1P47	no
AC092623.1	-1.94822	0.782796	-15.7947	6.92169e-47	1.35308e-44	95.7429	AC092623.1	down
IDO2	-0.68089	0.310418	-15.7877	7.47408e-47	1.45627e-44	95.6666	IDO2	down
ABCC6P2	1.44641	2.29454	15.7579	1.03858e-46	2.01697e-44	95.3394	ABCC6P2	up
UQCRHP4	-0.29034	0.0493147	-15.7298	1.41555e-46	2.74013e-44	95.0315	UQCRHP4	no
PDLIM3	-2.12777	2.19693	-15.715	1.66646e-46	3.21535e-44	94.8692	PDLIM3	down
AC005906.2	-0.360082	0.0676204	-15.7073	1.81224e-46	3.48531e-44	94.7858	AC005906.2	no
SYP	-0.875823	1.10132	-15.7049	1.86166e-46	3.5688e-44	94.759	SYP	down
AC105450.1	-1.56423	0.611745	-15.6957	2.06052e-46	3.93732e-44	94.6581	AC105450.1	down
RNF150	-2.08097	2.01021	-15.6947	2.08263e-46	3.9668e-44	94.6475	RNF150	down
GDF10	-2.74195	1.42933	-15.6928	2.12787e-46	4.04004e-44	94.6261	GDF10	down
AC079305.2	-0.886706	0.887296	-15.6864	2.28258e-46	4.31996e-44	94.5563	AC079305.2	down
PAPOLB	-0.0977097	0.0266761	-15.6815	2.40977e-46	4.54619e-44	94.5024	PAPOLB	no
PLEKHN1	2.17293	2.67156	15.6759	2.56129e-46	4.81677e-44	94.4418	PLEKHN1	up
MATN2	-2.87069	5.94649	-15.6736	2.62717e-46	4.92507e-44	94.4165	MATN2	down
DGKI	-2.80774	2.22935	-15.6548	3.23038e-46	6.03684e-44	94.211	DGKI	down
PTCHD4	2.32703	3.27713	15.6302	4.23552e-46	7.89041e-44	93.9416	PTCHD4	up
LINC01361	-0.221356	0.105814	-15.6277	4.35117e-46	8.08052e-44	93.9148	LINC01361	no
TBC1D4	-2.04671	3.97728	-15.6247	4.49853e-46	8.32817e-44	93.8817	TBC1D4	down
AC148477.3	-0.749632	0.272175	-15.6078	5.41532e-46	9.9943e-44	93.6972	AC148477.3	down
CCDC81	-0.644166	0.714921	-15.5946	6.25874e-46	1.15151e-43	93.5533	CCDC81	down
P4HA2	1.58837	4.60298	15.5681	8.37354e-46	1.53585e-43	93.2638	P4HA2	up
FAM167A-AS1	-1.09599	0.439722	-15.5672	8.45179e-46	1.54543e-43	93.2546	FAM167A-AS1	down
RGS8	-2.8875	1.22746	-15.552	9.98794e-46	1.82072e-43	93.0885	RGS8	down
NEK10	-0.318505	0.218488	-15.5487	1.03524e-45	1.88138e-43	93.0529	NEK10	no
Z97056.2	-0.690285	0.361984	-15.5427	1.10564e-45	2.0032e-43	92.9875	Z97056.2	down
NCAM1-AS1	-0.670869	0.296221	-15.5363	1.18688e-45	2.14385e-43	92.917	NCAM1-AS1	down
NUGGC	-2.12757	1.33024	-15.5359	1.19193e-45	2.14646e-43	92.9128	NUGGC	down
RADX	-1.15272	1.81137	-15.5292	1.28279e-45	2.30308e-43	92.8397	RADX	down
DPPA5P4	-0.776788	0.205371	-15.5145	1.50668e-45	2.69692e-43	92.6797	DPPA5P4	down
TMEM232	-0.853124	0.9885	-15.514	1.5152e-45	2.70402e-43	92.6741	TMEM232	down
PKDREJ	-0.239228	0.175219	-15.499	1.78505e-45	3.17605e-43	92.5112	PKDREJ	no
SLITRK5	-1.36584	0.498937	-15.4768	2.2761e-45	4.03766e-43	92.2695	SLITRK5	down
ABCA6	-0.936549	0.679632	-15.4669	2.53635e-45	4.48594e-43	92.1619	ABCA6	down
SLC6A16	-1.0413	0.855289	-15.4654	2.57872e-45	4.54492e-43	92.1454	SLC6A16	down
TMEM202-AS1	-0.582539	0.835145	-15.4652	2.58499e-45	4.54492e-43	92.143	TMEM202-AS1	down
AL157414.3	-0.485267	0.149859	-15.463	2.64903e-45	4.64377e-43	92.1187	AL157414.3	no
AL499604.1	-0.476845	0.181659	-15.4614	2.69535e-45	4.71108e-43	92.1014	AL499604.1	no
MAFB	-1.96406	5.64785	-15.4602	2.72973e-45	4.75718e-43	92.0888	MAFB	down
SAMD1	1.00693	5.89965	15.4553	2.88208e-45	5.008e-43	92.0348	SAMD1	up
IL20RA	-1.22024	0.925828	-15.4468	3.16019e-45	5.46142e-43	91.9432	IL20RA	down
TMEM253	-0.679144	0.362539	-15.4468	3.1614e-45	5.46142e-43	91.9428	TMEM253	down
CFAP61	-0.400192	0.272775	-15.4358	3.56695e-45	6.14416e-43	91.8228	CFAP61	no
FOXD3	-0.117388	0.0261311	-15.429	3.84027e-45	6.59583e-43	91.7494	FOXD3	no
STK32A	2.32668	4.4359	15.4251	4.00955e-45	6.86672e-43	91.7065	STK32A	up
AC009237.6	-1.13797	0.45828	-15.4188	4.29529e-45	7.33496e-43	91.6381	AC009237.6	down
CDH3	3.34751	5.1925	15.416	4.42893e-45	7.54149e-43	91.6076	CDH3	up
ZPBP	-0.375051	0.216634	-15.4105	4.70002e-45	7.98023e-43	91.5485	ZPBP	no
AC084876.2	-0.448061	0.365486	-15.3958	5.51974e-45	9.34534e-43	91.3887	AC084876.2	no
AC006427.2	-0.256884	0.0912854	-15.3886	5.97265e-45	1.00834e-42	91.3103	AC006427.2	no
AC079776.5	-0.184571	0.0850144	-15.387	6.07421e-45	1.02258e-42	91.2935	AC079776.5	no
DIRAS2	-1.87701	1.24663	-15.3818	6.4346e-45	1.08019e-42	91.2362	DIRAS2	down
AC134682.1	-0.437333	0.199274	-15.3737	7.02616e-45	1.17618e-42	91.1488	AC134682.1	no
STXBP5L	-2.32459	1.22941	-15.367	7.55738e-45	1.26155e-42	91.0763	STXBP5L	down
AC116345.3	-0.698154	0.213513	-15.3634	7.86754e-45	1.30965e-42	91.0363	AC116345.3	down
PHF5CP	-0.526787	0.197375	-15.3599	8.17306e-45	1.3567e-42	90.9984	PHF5CP	down
E2F1	1.63849	3.39894	15.3583	8.31157e-45	1.37585e-42	90.9817	E2F1	up
NECAB1	-1.4081	1.18815	-15.3546	8.6533e-45	1.42844e-42	90.9416	NECAB1	down
LGI1	-0.0604806	0.0225659	-15.3373	1.04548e-44	1.72105e-42	90.7536	LGI1	no
FAM124A	-1.454	1.24187	-15.3303	1.12847e-44	1.85253e-42	90.6777	FAM124A	down
CSGALNACT1	-2.2427	4.94023	-15.2956	1.64676e-44	2.69593e-42	90.3019	CSGALNACT1	down
LINGO2	-2.12903	0.995058	-15.2749	2.06219e-44	3.36676e-42	90.0782	LINGO2	down
CCSER1	-0.767713	0.67524	-15.2706	2.16209e-44	3.52017e-42	90.0312	CCSER1	down
NWD1	-1.58133	0.796519	-15.239	3.05048e-44	4.95303e-42	89.6889	NWD1	down
FMO2	-1.7191	1.25825	-15.2175	3.85158e-44	6.23673e-42	89.4571	FMO2	down
CFAP47	-0.462876	0.158168	-15.2099	4.18507e-44	6.75832e-42	89.3745	CFAP47	no
LRATD1	1.99084	3.36523	15.1722	6.30071e-44	1.01472e-41	88.9678	LRATD1	up
IGFBPL1	-3.33087	3.11566	-15.1628	6.98252e-44	1.12149e-41	88.8656	IGFBPL1	down
AL591501.1	-0.193904	0.0622776	-15.1605	7.15844e-44	1.14664e-41	88.8409	AL591501.1	no
AC016931.1	-0.197631	0.0675067	-15.1501	8.01208e-44	1.27993e-41	88.7289	AC016931.1	no
LINC02471	2.74589	2.70563	15.1424	8.71067e-44	1.3878e-41	88.6458	LINC02471	up
ENTPD1	2.10895	4.84598	15.1343	9.51087e-44	1.51124e-41	88.5584	ENTPD1	up
LINC01837	-0.107218	0.026091	-15.1199	1.11188e-43	1.76201e-41	88.4031	LINC01837	no
LINC02276	-1.70095	1.11798	-15.1104	1.23262e-43	1.94817e-41	88.3006	LINC02276	down
WSCD2	-3.83172	2.29999	-15.096	1.43954e-43	2.26917e-41	88.1463	WSCD2	down
DNAH7	-0.907536	0.932087	-15.0776	1.7575e-43	2.76305e-41	87.9479	DNAH7	down
AC009238.2	-0.763796	0.312358	-15.0495	2.38294e-43	3.73644e-41	87.6452	AC009238.2	down
AC012085.2	-0.383348	0.224451	-15.0469	2.45159e-43	3.83396e-41	87.617	AC012085.2	no
MYADM-AS1	-1.49898	1.06868	-15.0463	2.46766e-43	3.84897e-41	87.6105	MYADM-AS1	down
LINC00092	-1.63884	1.44224	-15.0414	2.60194e-43	4.04778e-41	87.5578	LINC00092	down
BRINP3	-0.737376	0.40131	-15.0395	2.65484e-43	4.11929e-41	87.5378	BRINP3	down
LINC02286	-0.491237	0.13514	-15.0386	2.68158e-43	4.14995e-41	87.5279	LINC02286	no
OR2V1	-0.378306	0.0628384	-15.0341	2.81448e-43	4.34432e-41	87.4798	OR2V1	no
AC008632.1	-0.534921	0.157196	-15.0148	3.46603e-43	5.33615e-41	87.2728	AC008632.1	down
PDE11A	-0.560144	0.319596	-15.0056	3.8286e-43	5.87912e-41	87.1739	PDE11A	down
TCEA1P3	-0.348256	0.0901257	-15.0002	4.06003e-43	6.21844e-41	87.1155	TCEA1P3	no
SVEP1	-1.60079	1.15189	-14.9987	4.12836e-43	6.30684e-41	87.0989	SVEP1	down
ART2P	-0.881669	0.276293	-14.9945	4.31727e-43	6.57852e-41	87.0544	ART2P	down
LINC01765	-0.518254	0.140219	-14.9845	4.8094e-43	7.30967e-41	86.9471	LINC01765	down
FAM163A	-1.68881	0.712386	-14.954	6.68871e-43	1.01401e-40	86.6192	FAM163A	down
PRICKLE2-AS1	-0.0454086	0.0181435	-14.9522	6.81882e-43	1.0311e-40	86.6001	PRICKLE2-AS1	no
PRR15	4.87283	6.04771	14.9474	7.17996e-43	1.08295e-40	86.5488	PRR15	up
RTP3	-0.575407	0.257183	-14.9254	9.10118e-43	1.36925e-40	86.313	RTP3	down
MPPED2	-2.89179	2.31901	-14.9211	9.53264e-43	1.42813e-40	86.267	MPPED2	down
CCDC146	-1.86996	3.12602	-14.921	9.54059e-43	1.42813e-40	86.2662	CCDC146	down
PLSCR4	-1.6552	4.23456	-14.9182	9.83754e-43	1.46888e-40	86.2357	PLSCR4	down
SLC22A31	4.55898	4.58972	14.9027	1.16206e-42	1.73076e-40	86.0701	SLC22A31	up
CTH	-1.54851	2.70596	-14.8829	1.43946e-42	2.13857e-40	85.8573	CTH	down
AC036108.1	-0.714964	0.420323	-14.8808	1.4716e-42	2.18086e-40	85.8354	AC036108.1	down
CWH43	-3.16118	2.18302	-14.8753	1.56212e-42	2.30925e-40	85.776	CWH43	down
CYP8B1	-0.233393	0.118809	-14.8665	1.71784e-42	2.53315e-40	85.6816	CYP8B1	no
AC025280.2	-0.163762	0.0520531	-14.8632	1.77851e-42	2.61613e-40	85.6471	AC025280.2	no
SHROOM4	2.12917	4.17805	14.8626	1.78969e-42	2.62607e-40	85.6408	SHROOM4	up
ACSM2A	-0.125886	0.0424602	-14.8585	1.87041e-42	2.73776e-40	85.597	ACSM2A	no
IGSF9B	-1.53878	1.85724	-14.852	2.00655e-42	2.92981e-40	85.5271	IGSF9B	down
ADAM22	-1.45622	1.39588	-14.8381	2.32962e-42	3.39319e-40	85.3787	ADAM22	down
UPK3A	-2.2343	1.12543	-14.8372	2.35352e-42	3.41962e-40	85.3686	UPK3A	down
AL138787.1	-0.649117	0.383455	-14.8263	2.64573e-42	3.83482e-40	85.2522	AL138787.1	down
AC026124.2	-0.967622	0.900871	-14.8259	2.65711e-42	3.84194e-40	85.248	AC026124.2	down
Z83847.1	-0.364308	0.229048	-14.8239	2.71629e-42	3.91798e-40	85.2261	Z83847.1	no
TEX47	-0.372989	0.108784	-14.7972	3.61908e-42	5.20753e-40	84.9408	TEX47	no
TLE4	-1.64183	2.44575	-14.7824	4.24271e-42	6.09014e-40	84.7828	TLE4	down
C5orf64	-0.0527645	0.0217159	-14.7776	4.46435e-42	6.39285e-40	84.7322	C5orf64	no
SOX9-AS1	-0.506043	0.269137	-14.7739	4.64636e-42	6.63749e-40	84.6925	SOX9-AS1	down
AC107029.2	-0.1928	0.0895606	-14.7675	4.97483e-42	7.08967e-40	84.6246	AC107029.2	no
AC012254.3	-0.577132	0.368654	-14.7665	5.02737e-42	7.14741e-40	84.6141	AC012254.3	down
PPP1R12A-AS1	-1.16434	1.38574	-14.7556	5.65479e-42	8.02023e-40	84.4972	PPP1R12A-AS1	down
CFAP221	-1.0016	0.96735	-14.7516	5.90185e-42	8.35069e-40	84.4547	CFAP221	down
AC099792.1	-0.127055	0.049072	-14.7298	7.45568e-42	1.05242e-39	84.2224	AC099792.1	no
SMOC2	-2.93204	4.40815	-14.7087	9.34898e-42	1.31654e-39	83.9975	SMOC2	down
SLC35F4	-0.701936	0.251665	-14.7053	9.69533e-42	1.36209e-39	83.9613	SLC35F4	down
CCL21	-5.77211	4.24905	-14.705	9.72042e-42	1.36239e-39	83.9587	CCL21	down
HDAC4	-1.11416	2.2793	-14.7033	9.90445e-42	1.38492e-39	83.9401	HDAC4	down
AL133482.1	-1.45787	1.03036	-14.7	1.02581e-41	1.431e-39	83.9052	AL133482.1	down
AP001271.1	-1.07546	0.495537	-14.6976	1.05306e-41	1.46558e-39	83.8792	AP001271.1	down
C2orf73	-0.933697	0.79255	-14.6759	1.32767e-41	1.84344e-39	83.6488	C2orf73	down
AL590867.1	-0.648322	0.198722	-14.6725	1.37726e-41	1.90785e-39	83.6124	AL590867.1	down
AC104667.1	-0.572199	0.439693	-14.6599	1.57549e-41	2.17736e-39	83.4787	AC104667.1	down
GLT8D2	-2.4805	3.4396	-14.6589	1.59353e-41	2.19718e-39	83.4674	GLT8D2	down
AL021408.1	-0.448493	0.320169	-14.6562	1.64034e-41	2.2565e-39	83.4386	AL021408.1	no
AL450423.1	-0.123194	0.0291724	-14.65	1.7526e-41	2.40535e-39	83.3728	AL450423.1	no
PI16	-3.31533	2.47401	-14.6483	1.78416e-41	2.44303e-39	83.3551	PI16	down
AL121759.1	-0.235415	0.0858498	-14.648	1.78975e-41	2.44504e-39	83.352	AL121759.1	no
DNAAF1	-1.44503	1.07977	-14.6454	1.84047e-41	2.50857e-39	83.3242	DNAAF1	down
AC016573.1	-0.49141	0.163438	-14.6392	1.96609e-41	2.67366e-39	83.2586	AC016573.1	no
AC068279.2	-1.57385	1.14703	-14.6373	2.00625e-41	2.72204e-39	83.2385	AC068279.2	down
SPAG5-AS1	-0.790975	0.595137	-14.6353	2.0499e-41	2.77493e-39	83.2171	SPAG5-AS1	down
ABR	1.22573	4.75702	14.6332	2.09751e-41	2.83292e-39	83.1943	ABR	up
AC005682.1	-0.660142	0.578885	-14.6329	2.10305e-41	2.83397e-39	83.1916	AC005682.1	down
FAM95C	-1.16219	0.728279	-14.6304	2.16055e-41	2.90487e-39	83.1648	FAM95C	down
OSMR-AS1	-0.434545	0.374078	-14.622	2.36238e-41	3.16905e-39	83.0761	OSMR-AS1	no
LIFR	-2.36086	3.346	-14.6217	2.37004e-41	3.17217e-39	83.0728	LIFR	down
AL157886.1	-0.249589	0.121827	-14.6153	2.53905e-41	3.39075e-39	83.0044	AL157886.1	no
AL033519.4	-1.558	2.90699	-14.6105	2.67318e-41	3.56186e-39	82.9532	AL033519.4	down
AL353746.1	-0.974894	0.336876	-14.6051	2.83006e-41	3.76246e-39	82.8965	AL353746.1	down
TLE1	-1.43042	3.7185	-14.6039	2.86905e-41	3.80579e-39	82.8829	TLE1	down
LIFR-AS1	-1.11966	1.04603	-14.5991	3.0176e-41	3.99392e-39	82.8328	LIFR-AS1	down
NHSL2	1.60547	3.42559	14.5978	3.05947e-41	4.04034e-39	82.8191	NHSL2	up
HMGA2	2.81699	2.80267	14.5938	3.19528e-41	4.21033e-39	82.7759	HMGA2	up
AC125807.2	-1.43804	1.85267	-14.5908	3.29787e-41	4.3359e-39	82.7445	AC125807.2	down
OGN	-2.72311	1.78318	-14.5595	4.6063e-41	6.0428e-39	82.4124	OGN	down
LNCTAM34A	0.95976	1.78683	14.5578	4.69244e-41	6.14223e-39	82.3939	LNCTAM34A	up
CFAP54	-0.62987	0.474441	-14.5565	4.75635e-41	6.21221e-39	82.3805	CFAP54	down
OTC	-0.454765	0.138695	-14.5556	4.80031e-41	6.25588e-39	82.3714	OTC	no
LANCL1-AS1	-0.583851	0.536178	-14.5482	5.1947e-41	6.75504e-39	82.2929	LANCL1-AS1	down
BTBD6P1	-0.503275	0.24464	-14.5324	6.1498e-41	7.97956e-39	82.1251	BTBD6P1	down
MYO16	-0.292722	0.114706	-14.5212	6.92625e-41	8.96746e-39	82.0069	MYO16	no
KHDRBS2	-2.45077	2.16217	-14.5088	7.90717e-41	1.02152e-38	81.8753	KHDRBS2	down
AL139805.1	-0.875798	0.629162	-14.5022	8.48532e-41	1.09383e-38	81.8052	AL139805.1	down
ATP2C2-AS1	-0.35005	0.225399	-14.4914	9.51769e-41	1.22426e-38	81.6911	ATP2C2-AS1	no
SMAD9-IT1	-1.44948	1.05845	-14.4895	9.70529e-41	1.24569e-38	81.6717	SMAD9-IT1	down
IQCH-AS1	-0.758059	1.30915	-14.4784	1.09285e-40	1.39818e-38	81.5537	IQCH-AS1	down
AC108058.1	-0.574135	0.241853	-14.4783	1.09403e-40	1.39818e-38	81.5526	AC108058.1	down
WNT11	-1.98728	1.48454	-14.4776	1.10162e-40	1.40485e-38	81.5457	WNT11	down
ATP2B1-AS1	-1.14733	1.70766	-14.4653	1.2562e-40	1.59855e-38	81.4152	ATP2B1-AS1	down
AC006063.4	-0.123479	0.0216338	-14.4636	1.27903e-40	1.62412e-38	81.3973	AC006063.4	no
AP000842.2	-0.33831	0.103479	-14.4586	1.34842e-40	1.70859e-38	81.3448	AP000842.2	no
ZDHHC11B	-1.14516	1.13472	-14.4558	1.39021e-40	1.75779e-38	81.3145	ZDHHC11B	down
RPL34-DT	-0.378261	0.325197	-14.4447	1.56279e-40	1.97181e-38	81.1982	RPL34-DT	no
AL355053.1	-0.254896	0.115273	-14.4395	1.65195e-40	2.07988e-38	81.143	AL355053.1	no
ADGRA3	-1.62491	3.85159	-14.4355	1.72349e-40	2.16537e-38	81.1009	ADGRA3	down
AC068620.3	-0.513934	0.401298	-14.4345	1.74335e-40	2.1857e-38	81.0895	AC068620.3	down
RPS6KA6	-1.6047	2.57718	-14.4337	1.75768e-40	2.19903e-38	81.0814	RPS6KA6	down
AL162377.1	-1.18474	2.29259	-14.4277	1.87339e-40	2.33887e-38	81.018	AL162377.1	down
AL954705.1	-0.802261	0.617119	-14.4239	1.94941e-40	2.42867e-38	80.9785	AL954705.1	down
SCN1B	1.68271	3.07286	14.4195	2.04441e-40	2.5417e-38	80.9312	SCN1B	up
CLCNKB	-2.50177	2.89058	-14.4135	2.17825e-40	2.70243e-38	80.8682	CLCNKB	down
ACACB	-1.55417	2.97734	-14.3996	2.52391e-40	3.12475e-38	80.7218	ACACB	down
RHAG	-0.0656447	0.0175865	-14.3917	2.74487e-40	3.39125e-38	80.6384	RHAG	no
AC092691.1	-0.157042	0.0430076	-14.3846	2.95832e-40	3.64739e-38	80.564	AC092691.1	no
KCNK2	-2.52245	2.13846	-14.3841	2.97476e-40	3.66006e-38	80.5585	KCNK2	down
RBM24	-1.09745	0.677717	-14.3836	2.99151e-40	3.67307e-38	80.5529	RBM24	down
UTS2B	-0.210288	0.145636	-14.3802	3.10245e-40	3.80143e-38	80.5167	UTS2B	no
SEPTIN7-DT	-1.06211	1.45641	-14.3771	3.20347e-40	3.91713e-38	80.4848	SEPTIN7-DT	down
TMC6	2.09559	4.76228	14.3665	3.58663e-40	4.37665e-38	80.3726	TMC6	up
AC078820.1	-0.632521	0.272475	-14.3646	3.65849e-40	4.45518e-38	80.3529	AC078820.1	down
AC106795.3	-0.726855	0.304988	-14.3589	3.88503e-40	4.72138e-38	80.2931	AC106795.3	down
AC080100.1	-0.519632	0.281641	-14.357	3.96489e-40	4.80861e-38	80.2729	AC080100.1	down
AL158206.1	1.36223	4.04624	14.3421	4.64235e-40	5.61875e-38	80.1162	AL158206.1	up
PAK3	-1.85599	1.45074	-14.3365	4.92789e-40	5.95223e-38	80.0568	PAK3	down
LINC02454	2.10669	2.1749	14.3337	5.07438e-40	6.11674e-38	80.0277	LINC02454	up
AC027601.4	-1.20803	0.931049	-14.3329	5.11798e-40	6.15681e-38	80.0192	AC027601.4	down
AC011450.1	-0.997431	0.861834	-14.3298	5.2909e-40	6.35197e-38	79.9862	AC011450.1	down
AC104472.4	-1.11355	1.11769	-14.3147	6.20351e-40	7.43258e-38	79.8281	AC104472.4	down
ENO4	-0.629054	0.596485	-14.3135	6.2857e-40	7.5159e-38	79.815	ENO4	down
NOC2LP1	-1.76004	1.03241	-14.3105	6.48826e-40	7.74252e-38	79.7835	NOC2LP1	down
AC021979.3	-0.307659	0.0855336	-14.3052	6.86425e-40	8.17479e-38	79.7275	AC021979.3	no
AC012178.1	-0.195307	0.0710276	-14.2943	7.70195e-40	9.15407e-38	79.613	AC012178.1	no
AC007743.1	-1.37073	1.52133	-14.2921	7.87939e-40	9.34628e-38	79.5904	AC007743.1	down
FAHD2A	-1.21416	3.87311	-14.288	8.23297e-40	9.74623e-38	79.5468	FAHD2A	down
AK3P2	-0.622131	0.305397	-14.2846	8.53214e-40	1.00803e-37	79.5113	AK3P2	down
NPDC1	1.53375	5.89875	14.2795	9.00765e-40	1.0621e-37	79.4574	NPDC1	up
COLEC10	-1.35551	0.978754	-14.2768	9.26351e-40	1.0901e-37	79.4296	COLEC10	down
RNVU1-18	-0.62197	0.135573	-14.2749	9.45448e-40	1.11038e-37	79.4093	RNVU1-18	down
AC126564.1	-0.323607	0.126729	-14.2695	1.00152e-39	1.17391e-37	79.3521	AC126564.1	no
IHO1	-0.573494	0.522979	-14.255	1.16633e-39	1.3644e-37	79.2007	IHO1	down
PKHD1L1	-3.86636	2.40428	-14.2518	1.20693e-39	1.40912e-37	79.1667	PKHD1L1	down
AC005920.2	-0.474423	0.160663	-14.2507	1.22061e-39	1.42229e-37	79.1555	AC005920.2	no
AP000936.1	-0.411677	0.140369	-14.2439	1.3117e-39	1.52545e-37	79.0839	AP000936.1	no
AC010857.1	-1.98025	0.848314	-14.2424	1.33276e-39	1.54691e-37	79.0681	AC010857.1	down
AC111000.4	-0.0700972	0.013158	-14.2403	1.36306e-39	1.579e-37	79.0458	AC111000.4	no
PCOLCE2	-1.76616	1.1749	-14.2385	1.38935e-39	1.60632e-37	79.0268	PCOLCE2	down
AL158168.1	-0.5017	0.166442	-14.2301	1.51736e-39	1.75091e-37	78.9392	AL158168.1	down
AL162727.1	-0.204515	0.0719488	-14.2289	1.53728e-39	1.77047e-37	78.9262	AL162727.1	no
VSTM2A	-0.169379	0.031388	-14.2267	1.57321e-39	1.80834e-37	78.9033	VSTM2A	no
AL135791.1	-0.970858	0.903513	-14.2156	1.76802e-39	2.02834e-37	78.7873	AL135791.1	down
AC112484.5	-0.483492	0.277745	-14.1963	2.16741e-39	2.4806e-37	78.5849	AC112484.5	no
GARNL3	-1.09361	1.68632	-14.1962	2.17059e-39	2.4806e-37	78.5834	GARNL3	down
ZCCHC12	5.70063	7.48404	14.1929	2.24692e-39	2.56291e-37	78.5491	ZCCHC12	up
PODN	-2.345	2.14873	-14.19	2.31611e-39	2.63677e-37	78.5189	PODN	down
LINC01877	-0.0777336	0.0349785	-14.1742	2.73553e-39	3.10831e-37	78.3535	LINC01877	no
SEMA3D	-3.69123	2.20635	-14.1669	2.95588e-39	3.35227e-37	78.2766	SEMA3D	down
RERGL	-1.85394	1.28982	-14.1604	3.16322e-39	3.58058e-37	78.2092	RERGL	down
FHDC1	-1.69106	4.27569	-14.14	3.92162e-39	4.43061e-37	77.9956	FHDC1	down
LINC02009	-0.844076	0.523001	-14.1377	4.01949e-39	4.53257e-37	77.9711	LINC02009	down
BANF2	-0.857901	0.320781	-14.1332	4.21515e-39	4.7442e-37	77.9239	BANF2	down
AC026100.1	-0.517929	0.311682	-14.1313	4.29723e-39	4.82744e-37	77.9047	AC026100.1	down
TUSC3	2.54232	4.98218	14.1299	4.36196e-39	4.89091e-37	77.8899	TUSC3	up
ADORA1	2.11677	4.54761	14.129	4.40216e-39	4.92668e-37	77.8808	ADORA1	up
TNS3	-1.5955	4.75515	-14.1259	4.54753e-39	5.07982e-37	77.8485	TNS3	down
AC103760.1	-0.386672	0.358951	-14.121	4.79192e-39	5.34277e-37	77.7965	AC103760.1	no
DUSP5P2	-0.445515	0.248333	-14.1188	4.90278e-39	5.45614e-37	77.7737	DUSP5P2	no
SYNE1	-1.89822	2.8602	-14.1154	5.07874e-39	5.64139e-37	77.7387	SYNE1	down
AC009238.1	-0.762113	0.298367	-14.1135	5.18296e-39	5.74606e-37	77.7185	AC009238.1	down
AL020997.5	-0.33886	0.150958	-14.1133	5.19231e-39	5.74606e-37	77.7167	AL020997.5	no
AC006019.2	-0.0810309	0.0216986	-14.1108	5.33019e-39	5.88768e-37	77.6907	AC006019.2	no
STARD13-AS	-0.285794	0.190938	-14.1033	5.77031e-39	6.36201e-37	77.6118	STARD13-AS	no
LINC02097	-0.101706	0.0394086	-14.1018	5.85848e-39	6.44726e-37	77.5968	LINC02097	no
PRKCQ-AS1	-1.07027	2.28989	-14.0969	6.1731e-39	6.78094e-37	77.5448	PRKCQ-AS1	down
AVPR1A	-2.34016	2.10547	-14.0828	7.15579e-39	7.84589e-37	77.398	AVPR1A	down
MPL	-0.768045	1.10999	-14.0729	7.93672e-39	8.68611e-37	77.2951	MPL	down
NGEF	3.4096	3.88906	14.0727	7.95322e-39	8.68816e-37	77.293	NGEF	up
FAXC	1.62738	2.12602	14.0699	8.19542e-39	8.93631e-37	77.2632	FAXC	up
RUNX1T1	-0.98159	1.10178	-14.0414	1.105e-38	1.20268e-36	76.9663	RUNX1T1	down
MAP3K6	1.14873	4.70414	14.0324	1.21446e-38	1.31941e-36	76.8724	MAP3K6	up
LINC01807	-0.094729	0.0196907	-14.013	1.4885e-38	1.61418e-36	76.6702	LINC01807	no
CCDC173	-1.30405	1.43518	-14.0084	1.56186e-38	1.69064e-36	76.6224	CCDC173	down
RXFP1	-0.829178	0.555225	-14.0066	1.59085e-38	1.7189e-36	76.6042	RXFP1	down
GABRB2	3.42066	3.26198	14.0013	1.68249e-38	1.81462e-36	76.5485	GABRB2	up
AC138028.1	-0.282929	0.167771	-13.9921	1.85212e-38	1.99394e-36	76.4531	AC138028.1	no
UBE2FP1	-1.08219	1.34463	-13.9854	1.98692e-38	2.1352e-36	76.3833	UBE2FP1	down
CT75	-0.860642	0.383386	-13.9852	1.99176e-38	2.13654e-36	76.3808	CT75	down
CDKN2B	1.85999	2.87218	13.9833	2.0321e-38	2.17588e-36	76.3609	CDKN2B	up
PMIS2	-0.199748	0.0380272	-13.9801	2.10098e-38	2.24559e-36	76.3278	PMIS2	no
ITPR1	-2.21361	2.65489	-13.9763	2.18445e-38	2.33062e-36	76.2891	ITPR1	down
NECTIN4	3.18924	3.9437	13.965	2.461e-38	2.62096e-36	76.1706	NECTIN4	up
AL023806.1	-0.739508	0.695555	-13.9615	2.55151e-38	2.7086e-36	76.1348	AL023806.1	down
MLF1	-1.28067	3.51299	-13.9615	2.5524e-38	2.7086e-36	76.1344	MLF1	down
AC068234.2	-1.23744	1.26989	-13.9522	2.81319e-38	2.98003e-36	76.0378	AC068234.2	down
UNC5B	1.74843	4.55653	13.9496	2.88834e-38	3.05419e-36	76.0116	UNC5B	up
RNVU1-2	-0.607226	0.135523	-13.9485	2.92309e-38	3.08545e-36	75.9997	RNVU1-2	down
AC073130.1	-0.462307	0.236284	-13.9434	3.08322e-38	3.2487e-36	75.9467	AC073130.1	no
TDGF1	-0.900567	0.537235	-13.9366	3.30989e-38	3.48136e-36	75.8762	TDGF1	down
AL138999.2	-0.537719	0.281384	-13.9289	3.58602e-38	3.76513e-36	75.7966	AL138999.2	down
OR2A1-AS1	-1.38238	1.40054	-13.9239	3.78105e-38	3.9629e-36	75.744	OR2A1-AS1	down
AL121574.1	-1.17268	1.13102	-13.9213	3.88516e-38	4.06485e-36	75.717	AL121574.1	down
AC008268.1	-0.573643	0.292172	-13.9204	3.92233e-38	4.09652e-36	75.7075	AC008268.1	down
ZNF806	-0.0573479	0.0274048	-13.9158	4.11183e-38	4.28691e-36	75.6606	ZNF806	no
U1	-0.454192	0.141574	-13.9123	4.26622e-38	4.43595e-36	75.624	U1	no
CDKL1	-0.978825	1.93753	-13.9122	4.26971e-38	4.43595e-36	75.6232	CDKL1	down
WDR72	-2.49159	3.97825	-13.9105	4.34771e-38	4.50909e-36	75.6052	WDR72	down
PLXND1	1.33821	5.85232	13.9083	4.44719e-38	4.60424e-36	75.5827	PLXND1	up
CDADC1	-1.19018	3.44504	-13.8996	4.86902e-38	5.0322e-36	75.4927	CDADC1	down
AL355916.2	-1.31963	1.08537	-13.8978	4.96616e-38	5.12368e-36	75.4731	AL355916.2	down
DSEL	-0.632102	0.748393	-13.8932	5.20964e-38	5.36557e-36	75.4255	DSEL	down
AP000944.5	-0.245555	0.16134	-13.8885	5.47192e-38	5.62595e-36	75.3767	AP000944.5	no
TUBA8	-0.275457	0.210699	-13.8867	5.57201e-38	5.71897e-36	75.3587	TUBA8	no
PROM1	-1.9284	1.01135	-13.8834	5.76683e-38	5.90872e-36	75.3246	PROM1	down
LINC02596	-0.550605	0.184936	-13.8777	6.12036e-38	6.26015e-36	75.2655	LINC02596	down
IRS4	-1.29414	0.561058	-13.874	6.35999e-38	6.49407e-36	75.2273	IRS4	down
IQCG	-1.01696	2.29243	-13.8736	6.39025e-38	6.51378e-36	75.2226	IQCG	down
FAM230I	-0.307791	0.0860239	-13.8726	6.45691e-38	6.57046e-36	75.2123	FAM230I	no
HAND2-AS1	-0.307544	0.144297	-13.872	6.49693e-38	6.59988e-36	75.2061	HAND2-AS1	no
BID	1.6031	4.51276	13.8708	6.5754e-38	6.6682e-36	75.1942	BID	up
DPP4	3.29397	4.21731	13.8613	7.26705e-38	7.35705e-36	75.0948	DPP4	up
L3MBTL4	-1.23414	1.8144	-13.8608	7.30376e-38	7.3757e-36	75.0898	L3MBTL4	down
ZMAT3	1.45799	4.66929	13.8607	7.3103e-38	7.3757e-36	75.0889	ZMAT3	up
SPX	-2.47712	2.07487	-13.8546	7.78483e-38	7.84117e-36	75.0265	SPX	down
AC026748.3	-1.17475	1.18954	-13.8534	7.88917e-38	7.93283e-36	75.0132	AC026748.3	down
AC004112.1	-0.640104	0.507817	-13.8497	8.19751e-38	8.22894e-36	74.9751	AC004112.1	down
LRIG2-DT	-0.674291	0.70659	-13.8492	8.2353e-38	8.25294e-36	74.9706	LRIG2-DT	down
ANO5	-1.39903	1.71491	-13.8487	8.27866e-38	8.28243e-36	74.9653	ANO5	down
AC009271.2	-0.116114	0.0341855	-13.8483	8.32039e-38	8.31018e-36	74.9604	AC009271.2	no
AC072026.2	-0.135937	0.0453509	-13.842	8.87991e-38	8.85413e-36	74.8957	AC072026.2	no
CFAP43	-1.22128	1.47784	-13.8379	9.26383e-38	9.22147e-36	74.8536	CFAP43	down
TRMT9B	-1.73313	3.48271	-13.8374	9.31387e-38	9.25577e-36	74.8483	TRMT9B	down
MAB21L3	-0.267809	0.110399	-13.8347	9.58329e-38	9.50762e-36	74.82	MAB21L3	no
AL392046.1	-0.286527	0.175468	-13.8289	1.01838e-37	1.00865e-35	74.7596	AL392046.1	no
AC099329.2	-0.280493	0.179089	-13.8252	1.0574e-37	1.04556e-35	74.7222	AC099329.2	no
KLHL10	-0.51147	0.442716	-13.8246	1.06456e-37	1.05089e-35	74.7155	KLHL10	down
LINC02511	-0.104074	0.0261704	-13.8186	1.13295e-37	1.11654e-35	74.6537	LINC02511	no
AC188616.1	-0.162466	0.0724229	-13.8183	1.13636e-37	1.11805e-35	74.6507	AC188616.1	no
AL121839.2	-0.847244	0.843842	-13.8136	1.19418e-37	1.173e-35	74.6014	AL121839.2	down
GLT1D1	2.10239	3.46556	13.8036	1.32519e-37	1.29954e-35	74.4979	GLT1D1	up
RPSAP52	1.44091	1.45211	13.7963	1.4284e-37	1.39844e-35	74.4234	RPSAP52	up
SCML2	-1.04498	1.27767	-13.7948	1.45075e-37	1.41799e-35	74.408	SCML2	down
LINC01659	-0.653568	0.279995	-13.7903	1.52041e-37	1.48364e-35	74.3614	LINC01659	down
MPZL2	2.02611	7.15494	13.7825	1.64982e-37	1.60728e-35	74.2803	MPZL2	up
ANGPTL5	-0.673995	0.397737	-13.7793	1.70453e-37	1.65785e-35	74.2479	ANGPTL5	down
PRKCQ	-1.45587	4.4803	-13.7687	1.90332e-37	1.84818e-35	74.1383	PRKCQ	down
TBC1D8-AS1	-1.19233	1.33361	-13.7652	1.97501e-37	1.91268e-35	74.1015	TBC1D8-AS1	down
PACRG-AS1	-0.0628334	0.0343859	-13.7651	1.97618e-37	1.91268e-35	74.1009	PACRG-AS1	no
HSDL1	-1.0077	4.89201	-13.743	2.48729e-37	2.40345e-35	73.8724	HSDL1	down
WDR11-AS1	-0.266662	0.19249	-13.7332	2.75256e-37	2.65546e-35	73.7717	WDR11-AS1	no
LINC02767	-0.504503	0.498385	-13.7303	2.83758e-37	2.73304e-35	73.7415	LINC02767	down
AL451085.1	-1.14731	1.07118	-13.7286	2.88772e-37	2.77683e-35	73.7241	AL451085.1	down
ZMAT4	-3.21809	1.88257	-13.7261	2.96146e-37	2.84315e-35	73.6991	ZMAT4	down
AP002008.3	-0.0828146	0.0261789	-13.7253	2.98788e-37	2.86388e-35	73.6902	AP002008.3	no
RANBP3L	-1.55229	1.36253	-13.7241	3.02487e-37	2.89467e-35	73.678	RANBP3L	down
ASPG	-0.823276	0.52995	-13.7208	3.12949e-37	2.98997e-35	73.6442	ASPG	down
THRSP	2.75424	4.90269	13.7202	3.14944e-37	3.0042e-35	73.6379	THRSP	up
WWOX	-1.26398	3.85833	-13.718	3.22248e-37	3.06894e-35	73.6152	WWOX	down
MORC2-AS1	-0.300507	0.231214	-13.7172	3.24805e-37	3.08835e-35	73.6073	MORC2-AS1	no
LPAR1	-1.55171	3.28372	-13.7123	3.41958e-37	3.24626e-35	73.5562	LPAR1	down
PTX3	-1.14442	1.45526	-13.6983	3.95399e-37	3.74759e-35	73.4119	PTX3	down
DDB2	1.05641	4.31357	13.6902	4.29854e-37	4.06766e-35	73.3289	DDB2	up
PLEKHG4B	-1.84127	1.39712	-13.6884	4.37892e-37	4.13713e-35	73.3105	PLEKHG4B	down
KLF2P2	-0.444465	0.269455	-13.6824	4.6578e-37	4.39364e-35	73.2492	KLF2P2	no
CCBE1	-0.444019	0.188958	-13.6789	4.83155e-37	4.55031e-35	73.2128	CCBE1	no
TPRG1-AS1	-0.767101	0.428636	-13.6716	5.20854e-37	4.89759e-35	73.1382	TPRG1-AS1	down
AC004862.1	-0.0363902	0.00978414	-13.6704	5.27856e-37	4.95559e-35	73.1249	AC004862.1	no
ATP6V0E2-AS1	-1.56186	1.87589	-13.6555	6.15429e-37	5.76863e-35	72.9724	ATP6V0E2-AS1	down
AC007091.1	-0.330125	0.0925634	-13.6498	6.53274e-37	6.11371e-35	72.9131	AC007091.1	no
AL359259.1	-0.144908	0.0281504	-13.6493	6.56597e-37	6.13516e-35	72.9081	AL359259.1	no
GGCT	1.76166	5.94792	13.6422	7.06071e-37	6.58708e-35	72.8359	GGCT	up
AP000821.2	-1.06776	0.456551	-13.6402	7.20911e-37	6.71498e-35	72.8153	AP000821.2	down
LRRC4C	-1.52721	1.30135	-13.6374	7.42671e-37	6.90684e-35	72.7857	LRRC4C	down
AC105053.1	-0.878184	0.598602	-13.6364	7.49965e-37	6.96378e-35	72.776	AC105053.1	down
AL358787.2	-0.431576	0.129203	-13.616	9.26037e-37	8.58528e-35	72.5665	AL358787.2	no
SNORD27	-0.766433	0.199875	-13.614	9.45279e-37	8.75001e-35	72.5461	SNORD27	down
GJB3	3.17733	3.70246	13.611	9.7495e-37	9.01063e-35	72.5154	GJB3	up
AL732509.1	-0.580992	0.899501	-13.6068	1.01853e-36	9.39874e-35	72.472	AL732509.1	down
LINC01748	-0.0336805	0.0124158	-13.6045	1.04245e-36	9.60458e-35	72.4489	LINC01748	no
TENM1	2.95148	3.62025	13.5878	1.23911e-36	1.13988e-34	72.2772	TENM1	up
NLRP14	-0.297515	0.191163	-13.586	1.26204e-36	1.15918e-34	72.259	NLRP14	no
AL157902.1	-0.230047	0.102351	-13.5823	1.31204e-36	1.20325e-34	72.2204	AL157902.1	no
AC011455.8	-0.721826	0.697015	-13.5817	1.31982e-36	1.20852e-34	72.2145	AC011455.8	down
CLDN16	4.07505	5.17438	13.5656	1.55835e-36	1.42474e-34	72.0495	CLDN16	up
AC024730.1	-0.877974	0.28207	-13.5649	1.56956e-36	1.43278e-34	72.0424	AC024730.1	down
SOX10	-0.348932	0.139062	-13.5612	1.63068e-36	1.4863e-34	72.0044	SOX10	no
DEUP1	-0.549065	0.484225	-13.5583	1.6805e-36	1.52936e-34	71.9745	DEUP1	down
DNAH6	-0.962393	1.12081	-13.5561	1.71761e-36	1.56074e-34	71.9529	DNAH6	down
SHANK2	-1.61397	1.96639	-13.5472	1.88273e-36	1.70817e-34	71.8617	SHANK2	down
GCATP1	-0.529608	0.497568	-13.5411	2.00581e-36	1.81706e-34	71.7988	GCATP1	down
AL023583.1	-0.86501	0.844996	-13.5367	2.09907e-36	1.89865e-34	71.7536	AL023583.1	down
FAM240A	-0.415716	0.159023	-13.5292	2.268e-36	2.04833e-34	71.6767	FAM240A	no
STK32A-AS1	1.97364	2.8453	13.5279	2.29684e-36	2.07123e-34	71.6642	STK32A-AS1	up
LINC01550	-0.887101	0.833062	-13.5254	2.35796e-36	2.12313e-34	71.6381	LINC01550	down
LINC00612	-0.416634	0.253118	-13.5248	2.37349e-36	2.13388e-34	71.6316	LINC00612	no
PTOV1-AS1	-0.852059	1.25783	-13.5128	2.68492e-36	2.41022e-34	71.5091	PTOV1-AS1	down
TTLL6	-0.107916	0.0396968	-13.5082	2.81381e-36	2.52212e-34	71.4625	TTLL6	no
AC010207.1	-0.981252	0.70088	-13.5034	2.9574e-36	2.64683e-34	71.4131	AC010207.1	down
DUSP4	2.02106	4.08566	13.4992	3.08632e-36	2.75806e-34	71.3707	DUSP4	up
AL049840.7	-0.693423	0.451509	-13.4991	3.09121e-36	2.75828e-34	71.3692	AL049840.7	down
AL161668.4	-0.377628	0.154667	-13.4964	3.17915e-36	2.83249e-34	71.3413	AL161668.4	no
RNU6-117P	-0.766234	0.197252	-13.4952	3.21853e-36	2.86329e-34	71.3291	RNU6-117P	down
HTR3C	-0.144929	0.0491032	-13.4936	3.26957e-36	2.90006e-34	71.3134	HTR3C	no
GP5	-0.661166	0.459335	-13.4936	3.26963e-36	2.90006e-34	71.3134	GP5	down
RPL31P14	-0.63992	0.309084	-13.4902	3.38563e-36	2.99848e-34	71.2788	RPL31P14	down
AC068473.1	-0.202919	0.106305	-13.4881	3.46135e-36	3.06098e-34	71.2568	AC068473.1	no
SYT16	-0.153568	0.0943431	-13.4874	3.48547e-36	3.07773e-34	71.2499	SYT16	no
C4orf47	-1.37163	2.57312	-13.4869	3.5021e-36	3.08782e-34	71.2452	C4orf47	down
SLC4A4	-3.01015	2.93845	-13.4858	3.54445e-36	3.11668e-34	71.2332	SLC4A4	down
LINC01725	-0.388475	0.393982	-13.4858	3.54532e-36	3.11668e-34	71.233	LINC01725	no
MIR4500HG	-0.232083	0.0630079	-13.4821	3.67982e-36	3.23014e-34	71.196	MIR4500HG	no
SPATA17	-0.791805	1.09895	-13.4738	4.00697e-36	3.51212e-34	71.1114	SPATA17	down
P2RX5-TAX1BP3	-0.313148	0.408657	-13.4697	4.18039e-36	3.65874e-34	71.0693	P2RX5-TAX1BP3	no
TMEM139	-2.0239	1.57671	-13.466	4.34299e-36	3.79545e-34	71.0314	TMEM139	down
SLC66A2	-0.921445	5.26272	-13.4651	4.3825e-36	3.82436e-34	71.0224	SLC66A2	down
NEGR1	-1.1852	0.876272	-13.4591	4.66061e-36	4.06108e-34	70.9613	NEGR1	down
AL022069.2	-0.490304	0.358666	-13.4567	4.77765e-36	4.15697e-34	70.9367	AL022069.2	no
TDRD6	-1.33848	1.33189	-13.4542	4.90173e-36	4.2587e-34	70.9112	TDRD6	down
ZIC2	-0.0778403	0.0235729	-13.4494	5.14942e-36	4.46736e-34	70.8623	ZIC2	no
PLCD3	2.64083	5.36519	13.4455	5.36354e-36	4.64634e-34	70.8218	PLCD3	up
AC097532.2	-0.240704	0.161042	-13.44	5.67133e-36	4.90582e-34	70.7664	AC097532.2	no
LRRTM2	-0.241423	0.181252	-13.4328	6.11054e-36	5.27807e-34	70.6923	LRRTM2	no
AC072061.1	-0.914888	1.52333	-13.4326	6.12303e-36	5.28118e-34	70.6903	AC072061.1	down
GLCCI1-DT	-0.669683	0.572556	-13.4301	6.2814e-36	5.40993e-34	70.6649	GLCCI1-DT	down
ABI3BP	-2.39268	3.12127	-13.4285	6.38593e-36	5.49199e-34	70.6485	ABI3BP	down
AC133552.1	-0.100877	0.0572269	-13.4192	7.02103e-36	6.02946e-34	70.5543	AC133552.1	no
FCN2	-0.465186	0.179619	-13.4121	7.55191e-36	6.476e-34	70.4819	FCN2	no
JAG2	1.18271	3.92535	13.4116	7.59225e-36	6.50122e-34	70.4766	JAG2	up
RSPO3	-0.962893	0.681114	-13.4106	7.66818e-36	6.55679e-34	70.4668	RSPO3	down
ZP2	-0.0660691	0.0198731	-13.4086	7.82603e-36	6.68143e-34	70.4465	ZP2	no
AC092645.2	-0.557086	0.531811	-13.4085	7.83644e-36	6.68143e-34	70.4452	AC092645.2	down
DNAAF6	-0.290862	0.127242	-13.4052	8.10334e-36	6.8991e-34	70.4119	DNAAF6	no
TNFRSF10C	1.75794	3.37953	13.4051	8.11556e-36	6.89962e-34	70.4104	TNFRSF10C	up
AC090152.1	-0.898893	0.711459	-13.3957	8.93885e-36	7.5887e-34	70.3145	AC090152.1	down
KIT	-3.03375	3.60668	-13.3941	9.07946e-36	7.69708e-34	70.299	KIT	down
C4orf51	-0.282183	0.111053	-13.3884	9.62406e-36	8.14714e-34	70.2411	C4orf51	no
OPRK1	-0.244965	0.0728901	-13.3879	9.67843e-36	8.18151e-34	70.2355	OPRK1	no
AC096920.1	-0.778751	0.442914	-13.3859	9.87623e-36	8.33686e-34	70.2154	AC096920.1	down
GRAMD2A	-1.72703	2.26402	-13.3847	9.99623e-36	8.42619e-34	70.2034	GRAMD2A	down
ARHGAP24	-2.09863	2.65158	-13.3839	1.00832e-35	8.48743e-34	70.1948	ARHGAP24	down
AC005086.2	-0.342558	0.161319	-13.3763	1.08958e-35	9.15844e-34	70.1178	AC005086.2	no
TNFRSF11B	-2.83651	5.30625	-13.3746	1.10862e-35	9.3054e-34	70.1006	TNFRSF11B	down
DDX18P3	-0.1277	0.0494145	-13.3716	1.14344e-35	9.58407e-34	70.0699	DDX18P3	no
AC067750.1	-0.991269	1.33952	-13.3686	1.17965e-35	9.86472e-34	70.0389	AC067750.1	down
VEGFD	-0.499576	0.34382	-13.3685	1.18024e-35	9.86472e-34	70.0384	VEGFD	no
ANKK1	-0.917771	0.665249	-13.3674	1.19377e-35	9.96379e-34	70.0271	ANKK1	down
AC002511.2	-1.2082	0.615623	-13.3553	1.3516e-35	1.12653e-33	69.9038	AC002511.2	down
FOXJ1	-2.59288	1.83837	-13.355	1.35505e-35	1.12782e-33	69.9013	FOXJ1	down
FER1L6	-1.42029	0.545352	-13.3525	1.38986e-35	1.15518e-33	69.8761	FER1L6	down
DRC1	-0.740646	0.35597	-13.3408	1.56673e-35	1.30036e-33	69.7571	DRC1	down
LAD1	1.96427	4.5612	13.3389	1.59722e-35	1.32382e-33	69.738	LAD1	up
ULBP2	1.86368	3.07993	13.3375	1.62101e-35	1.34166e-33	69.7233	ULBP2	up
AL589645.1	-0.122567	0.0376134	-13.3285	1.77796e-35	1.46953e-33	69.6315	AL589645.1	no
FAR2P2	-0.827428	0.818244	-13.3233	1.87472e-35	1.54735e-33	69.5789	FAR2P2	down
AC011306.1	-0.559454	0.342108	-13.3199	1.94129e-35	1.60007e-33	69.5442	AC011306.1	down
AL136090.2	-1.157	0.581268	-13.3148	2.04414e-35	1.68251e-33	69.4929	AL136090.2	down
SYTL1	1.67626	5.04209	13.3127	2.08891e-35	1.71698e-33	69.4714	SYTL1	up
PPARGC1A	-2.4362	2.68505	-13.3	2.37853e-35	1.95233e-33	69.3425	PPARGC1A	down
CNFN	1.7883	3.45457	13.2985	2.41565e-35	1.98007e-33	69.3271	CNFN	up
TSPAN2	-1.29996	1.74929	-13.2961	2.47397e-35	2.02508e-33	69.3034	TSPAN2	down
THRB-AS1	-0.174223	0.132294	-13.2875	2.70232e-35	2.20895e-33	69.2157	THRB-AS1	no
CDR2	-1.05846	5.47009	-13.287	2.71592e-35	2.21702e-33	69.2107	CDR2	down
IGHE	-2.43043	1.14657	-13.2815	2.87331e-35	2.34228e-33	69.1548	IGHE	down
BCL2	-1.8244	4.16335	-13.2783	2.9664e-35	2.41485e-33	69.1231	BCL2	down
FBXO15	-0.754087	0.721292	-13.2732	3.12692e-35	2.54205e-33	69.0708	FBXO15	down
AL035425.1	-1.79073	1.36682	-13.2677	3.30497e-35	2.68312e-33	69.0158	AL035425.1	down
CDA	1.60167	4.03534	13.2653	3.38717e-35	2.7461e-33	68.9914	CDA	up
SLC66A1L	-1.58788	1.75614	-13.2622	3.49499e-35	2.82965e-33	68.9603	SLC66A1L	down
PFKFB1	-0.749241	0.565241	-13.259	3.61092e-35	2.91954e-33	68.9278	PFKFB1	down
CLTCL1	-0.938516	1.96601	-13.2477	4.05483e-35	3.274e-33	68.8127	CLTCL1	down
BNIP3P18	-1.37636	0.988	-13.2455	4.14426e-35	3.34167e-33	68.791	BNIP3P18	down
RUNDC3A-AS1	1.15144	2.15126	13.241	4.33772e-35	3.49293e-33	68.7457	RUNDC3A-AS1	up
CASC2	-0.847967	1.30174	-13.2387	4.44056e-35	3.57089e-33	68.7224	CASC2	down
UNC80	-0.437479	0.24842	-13.2326	4.72861e-35	3.79739e-33	68.66	UNC80	no
FAM237B	-0.293896	0.182135	-13.2215	5.2954e-35	4.24682e-33	68.5476	FAM237B	no
AC110491.1	-0.376237	0.173199	-13.2198	5.38635e-35	4.31394e-33	68.5307	AC110491.1	no
AC106795.5	-0.762025	0.398752	-13.2194	5.40522e-35	4.32323e-33	68.5272	AC106795.5	down
AC021701.1	-0.210595	0.177687	-13.2148	5.66403e-35	4.52415e-33	68.4808	AC021701.1	no
LPAR5	2.84683	5.44258	13.2126	5.79252e-35	4.62057e-33	68.4585	LPAR5	up
AL596247.1	-0.870555	0.371481	-13.2118	5.84203e-35	4.65381e-33	68.45	AL596247.1	down
LINC00538	-0.0889458	0.0287815	-13.2115	5.85732e-35	4.65975e-33	68.4474	LINC00538	no
C13orf46	-1.07775	1.10307	-13.2089	6.0189e-35	4.78189e-33	68.4204	C13orf46	down
AL162388.2	-0.998422	0.411815	-13.207	6.13753e-35	4.86963e-33	68.401	AL162388.2	down
SCEL	3.13476	4.75255	13.1941	6.99329e-35	5.5412e-33	68.2714	SCEL	up
FJX1	1.3797	2.92338	13.1902	7.27722e-35	5.7585e-33	68.2319	FJX1	up
AL355870.2	-0.276009	0.121455	-13.1871	7.51161e-35	5.93607e-33	68.2004	AL355870.2	no
ELMO1	-2.35779	3.82723	-13.1831	7.81787e-35	6.16989e-33	68.1607	ELMO1	down
GRHL3	2.01066	2.03655	13.1732	8.65043e-35	6.81789e-33	68.0602	GRHL3	up
COL13A1	1.85098	2.31986	13.173	8.66848e-35	6.82307e-33	68.0582	COL13A1	up
FZD10-AS1	-0.543557	0.498207	-13.1691	9.01396e-35	7.08562e-33	68.0193	FZD10-AS1	down
AC062015.1	-3.20667	2.40431	-13.1682	9.10238e-35	7.14567e-33	68.0097	AC062015.1	down
HFM1	-0.9741	0.862983	-13.1666	9.2536e-35	7.2548e-33	67.9933	HFM1	down
ARHGAP6	-1.32243	3.81213	-13.1642	9.47522e-35	7.41876e-33	67.9698	ARHGAP6	down
SPAG5	-1.3951	2.34296	-13.1525	1.06679e-34	8.34158e-33	67.8521	SPAG5	down
TGFA	2.05085	5.55486	13.1509	1.08519e-34	8.47433e-33	67.8351	TGFA	up
C3orf20	-0.219262	0.153821	-13.1495	1.1004e-34	8.58182e-33	67.8212	C3orf20	no
RORB-AS1	-0.16783	0.058477	-13.1456	1.14469e-34	8.91146e-33	67.7821	RORB-AS1	no
CCDC110	-1.24218	1.79559	-13.1455	1.14567e-34	8.91146e-33	67.7812	CCDC110	down
KIZ-AS1	-0.149394	0.103507	-13.1405	1.20562e-34	9.36552e-33	67.7306	KIZ-AS1	no
AC006460.2	-0.42063	0.521992	-13.1384	1.23095e-34	9.54982e-33	67.7099	AC006460.2	no
PRTG	-1.62353	2.33755	-13.1317	1.31832e-34	1.02143e-32	67.6418	PRTG	down
NRSN2-AS1	-0.982264	1.99126	-13.1219	1.45532e-34	1.12572e-32	67.5436	NRSN2-AS1	down
AC009522.1	-0.0733835	0.0303557	-13.1218	1.45671e-34	1.12572e-32	67.5427	AC009522.1	no
AC010624.5	-0.660706	0.689313	-13.1187	1.50448e-34	1.16113e-32	67.5107	AC010624.5	down
FAM151A	-0.89726	0.951488	-13.1106	1.63198e-34	1.25789e-32	67.4299	FAM151A	down
PCLO	-1.07843	1.57757	-13.1098	1.64636e-34	1.26733e-32	67.4212	PCLO	down
AC125618.1	-0.623426	0.337927	-13.0989	1.83805e-34	1.41306e-32	67.3118	AC125618.1	down
LINC02609	-0.553831	0.47805	-13.0953	1.90603e-34	1.46343e-32	67.2757	LINC02609	down
SLC5A8	-3.7194	3.07655	-13.089	2.03058e-34	1.55705e-32	67.2129	SLC5A8	down
AC139272.1	-0.225977	0.0584293	-13.0868	2.07773e-34	1.59115e-32	67.1901	AC139272.1	no
TSPAN8	-1.42483	0.820117	-13.0848	2.11975e-34	1.62124e-32	67.1702	TSPAN8	down
PGM5-AS1	-0.38267	0.19072	-13.0834	2.15092e-34	1.64296e-32	67.1557	PGM5-AS1	no
ADAMTSL4-AS1	-0.478712	0.303311	-13.0807	2.20919e-34	1.68531e-32	67.1292	ADAMTSL4-AS1	no
LINC00506	-0.253218	0.170603	-13.0773	2.28721e-34	1.74259e-32	67.0947	LINC00506	no
NUAK2	-1.48224	4.64259	-13.0723	2.40586e-34	1.83064e-32	67.0445	NUAK2	down
SPIRE2	-1.47757	2.35212	-13.0697	2.47004e-34	1.87707e-32	67.0183	SPIRE2	down
CAMK1D	-1.50686	3.83667	-13.0673	2.52923e-34	1.9196e-32	66.9948	CAMK1D	down
LTF	-2.57132	2.72278	-13.0632	2.63763e-34	1.99932e-32	66.9531	LTF	down
SORBS2	-2.29228	4.5784	-13.0548	2.87209e-34	2.17427e-32	66.8686	SORBS2	down
AC007991.3	-0.386415	0.121096	-13.0543	2.88464e-34	2.18099e-32	66.8643	AC007991.3	no
PEG3	-1.273	1.0405	-13.05	3.01493e-34	2.2766e-32	66.8204	PEG3	down
KY	-1.64187	1.63803	-13.0488	3.05227e-34	2.30187e-32	66.8082	KY	down
UBTD1	0.948539	5.90203	13.0437	3.21304e-34	2.42004e-32	66.7572	UBTD1	up
NRCAM	1.86106	4.41019	13.0391	3.36405e-34	2.53058e-32	66.7116	NRCAM	up
AC141930.1	-2.26934	1.0815	-13.0345	3.52504e-34	2.64832e-32	66.6652	AC141930.1	down
FBLN7	-1.48372	3.06328	-13.0336	3.55801e-34	2.66972e-32	66.6559	FBLN7	down
AL359853.1	-1.21979	0.538361	-13.0323	3.60572e-34	2.7021e-32	66.6427	AL359853.1	down
AC008649.2	-0.618831	0.258311	-13.0288	3.73436e-34	2.79498e-32	66.6079	AC008649.2	down
TEAD4	-1.14955	4.10009	-13.0248	3.88779e-34	2.90616e-32	66.5679	TEAD4	down
AC020912.1	-0.845963	0.527187	-13.0243	3.90674e-34	2.91665e-32	66.5631	AC020912.1	down
STK32B	-0.653413	0.704883	-13.0232	3.95113e-34	2.9461e-32	66.5519	STK32B	down
AC239799.2	-0.171354	0.0560981	-13.0205	4.06086e-34	3.02412e-32	66.5247	AC239799.2	no
AP005329.2	-0.537093	0.64889	-13.0181	4.15873e-34	3.09313e-32	66.501	AP005329.2	down
ZNF658B	-0.681914	0.652075	-13.0157	4.26185e-34	3.16586e-32	66.4767	ZNF658B	down
DEPTOR	-2.15896	5.85513	-13.0139	4.34222e-34	3.22154e-32	66.4581	DEPTOR	down
FGL2	-1.75132	3.48544	-13.0132	4.37351e-34	3.24071e-32	66.451	FGL2	down
AC090739.1	-1.19981	1.39417	-13.0127	4.3938e-34	3.25169e-32	66.4464	AC090739.1	down
BMP5	-0.782318	0.430058	-12.9962	5.19126e-34	3.83707e-32	66.2808	BMP5	down
TENT5B	-1.76044	2.95801	-12.9945	5.27792e-34	3.89628e-32	66.2644	TENT5B	down
AC090541.1	-0.734475	0.288177	-12.9926	5.38314e-34	3.96903e-32	66.2448	AC090541.1	down
STARD13	-1.52741	3.81412	-12.9881	5.62961e-34	4.14561e-32	66.2003	STARD13	down
AL160269.1	-0.290555	0.139941	-12.9767	6.31946e-34	4.64785e-32	66.0855	AL160269.1	no
LCMT1-AS1	-0.539811	0.713168	-12.9648	7.12196e-34	5.2316e-32	65.9668	LCMT1-AS1	down
SPTBN2	1.90638	2.39685	12.9592	7.53367e-34	5.5272e-32	65.911	SPTBN2	up
AL031710.1	-2.87969	2.557	-12.9569	7.71022e-34	5.64976e-32	65.888	AL031710.1	down
C9orf16	1.17636	6.71115	12.9552	7.84484e-34	5.74132e-32	65.8709	C9orf16	up
HOATZ	-0.289451	0.17459	-12.9517	8.12225e-34	5.93704e-32	65.8364	HOATZ	no
HHIP	-0.373382	0.138399	-12.9503	8.24184e-34	6.01705e-32	65.8218	HHIP	no
AC092645.1	-1.81278	2.23491	-12.9469	8.52941e-34	6.21936e-32	65.7878	AC092645.1	down
TTC34	-0.857312	0.841882	-12.9444	8.74807e-34	6.36737e-32	65.7627	TTC34	down
EML6	-1.05659	1.33444	-12.9443	8.75383e-34	6.36737e-32	65.762	EML6	down
QPCT	2.80933	5.83819	12.9423	8.93637e-34	6.4922e-32	65.7415	QPCT	up
RPS16P5	-0.344811	0.131095	-12.941	9.04751e-34	6.56491e-32	65.7292	RPS16P5	no
DYNLRB2	-1.16687	1.6296	-12.9358	9.53578e-34	6.91076e-32	65.6771	DYNLRB2	down
TRHDE-AS1	-0.0550123	0.0188955	-12.9355	9.56531e-34	6.92372e-32	65.674	TRHDE-AS1	no
DCDC2C	-0.239477	0.0715854	-12.9293	1.01832e-33	7.35492e-32	65.6118	DCDC2C	no
AKR1C1	-1.56445	1.17065	-12.9292	1.01858e-33	7.35492e-32	65.6116	AKR1C1	down
SCN3A	-0.630609	0.402662	-12.9251	1.06148e-33	7.65542e-32	65.5706	SCN3A	down
AL445205.1	-0.158998	0.0369936	-12.9224	1.09128e-33	7.86081e-32	65.5431	AL445205.1	no
LINC02560	2.53998	3.42298	12.9193	1.1255e-33	8.0975e-32	65.5125	LINC02560	up
RSKR	-1.01262	1.53212	-12.9184	1.13552e-33	8.15967e-32	65.5037	RSKR	down
CTXN1	2.57173	4.93881	12.9157	1.1672e-33	8.37722e-32	65.4763	CTXN1	up
TMEM220	-1.45124	3.26319	-12.9147	1.17846e-33	8.44784e-32	65.4668	TMEM220	down
AC100823.1	-0.600683	0.199942	-12.9066	1.27952e-33	9.16121e-32	65.3851	AC100823.1	down
AL928654.1	-0.984386	1.76385	-12.9026	1.33159e-33	9.52252e-32	65.3455	AL928654.1	down
FAM181B	-1.22055	1.00345	-12.897	1.40854e-33	1.00608e-31	65.2897	FAM181B	down
CDT1	1.41261	3.38663	12.8927	1.47107e-33	1.04948e-31	65.2466	CDT1	up
LINC02848	-0.236397	0.198834	-12.8917	1.48482e-33	1.05801e-31	65.2374	LINC02848	no
COL23A1	-2.91749	5.09584	-12.8916	1.48746e-33	1.05863e-31	65.2356	COL23A1	down
ANGPTL1	-2.28247	4.00911	-12.8902	1.50853e-33	1.07233e-31	65.2217	ANGPTL1	down
TTC30A	-1.27021	2.7776	-12.8873	1.5523e-33	1.10213e-31	65.1933	TTC30A	down
AC108471.2	-0.563674	0.533791	-12.8813	1.64916e-33	1.1695e-31	65.1332	AC108471.2	down
BX322234.1	-0.565858	0.736738	-12.8783	1.69861e-33	1.20314e-31	65.1038	BX322234.1	down
AC069234.1	-0.595146	0.227934	-12.8774	1.71401e-33	1.2126e-31	65.0949	AC069234.1	down
RMDN1	-0.915355	4.84565	-12.8749	1.75819e-33	1.24238e-31	65.0696	RMDN1	down
AC103957.2	-1.84039	1.57083	-12.8702	1.84247e-33	1.30039e-31	65.0231	AC103957.2	down
KIF19	-1.6842	0.981075	-12.8682	1.88081e-33	1.32587e-31	65.0027	KIF19	down
GALNT7	1.76944	5.09113	12.8643	1.95619e-33	1.37738e-31	64.9636	GALNT7	up
AL138999.1	-1.11229	0.987601	-12.8639	1.96308e-33	1.38059e-31	64.9602	AL138999.1	down
BAX	0.925605	6.22178	12.8621	2.00016e-33	1.405e-31	64.9416	BAX	up
RFX4	-0.234541	0.111967	-12.8619	2.00383e-33	1.40592e-31	64.9398	RFX4	no
AC099563.2	-0.180369	0.0538141	-12.8568	2.10786e-33	1.47717e-31	64.8895	AC099563.2	no
TPTE2P1	-1.95734	1.36458	-12.8549	2.14816e-33	1.50364e-31	64.8707	TPTE2P1	down
PLCH1-AS1	-0.143995	0.0479329	-12.8526	2.19869e-33	1.5372e-31	64.8476	PLCH1-AS1	no
TEKT1	-0.522043	0.174023	-12.8519	2.2145e-33	1.54643e-31	64.8405	TEKT1	down
OR2A1	-0.309426	0.223864	-12.8487	2.28655e-33	1.59487e-31	64.8087	OR2A1	no
APOD	-2.99722	4.37707	-12.8409	2.4738e-33	1.72345e-31	64.7306	APOD	down
GPX1	0.925353	9.47816	12.8386	2.53029e-33	1.76074e-31	64.7082	GPX1	up
ALDH1A2	-0.77523	0.569261	-12.8384	2.53539e-33	1.76223e-31	64.7062	ALDH1A2	down
PTGFR	-0.509129	0.219932	-12.8305	2.74462e-33	1.90543e-31	64.6274	PTGFR	down
FMOD	-1.96536	6.31662	-12.8291	2.78312e-33	1.9299e-31	64.6136	FMOD	down
AC074194.2	-0.426904	0.321288	-12.8263	2.86278e-33	1.98282e-31	64.5856	AC074194.2	no
CITED2	-1.96943	7.67798	-12.8192	3.07357e-33	2.12634e-31	64.5151	CITED2	down
AC136475.1	-0.850778	0.668315	-12.8177	3.11973e-33	2.15577e-31	64.5003	AC136475.1	down
AC078899.1	-1.62833	2.48476	-12.8154	3.19316e-33	2.20395e-31	64.4772	AC078899.1	down
AP003117.1	-0.727212	0.739038	-12.8125	3.28737e-33	2.26634e-31	64.4483	AP003117.1	down
AC063944.1	-0.166968	0.168384	-12.8114	3.32298e-33	2.28824e-31	64.4376	AC063944.1	no
FLRT2	-1.00239	1.14054	-12.8091	3.40164e-33	2.33969e-31	64.4144	FLRT2	down
QRFP	-0.619864	0.814397	-12.8086	3.4169e-33	2.34747e-31	64.4099	QRFP	down
AC141273.1	-0.124775	0.0235624	-12.8075	3.45346e-33	2.36985e-31	64.3994	AC141273.1	no
KIAA1671-AS1	-0.923628	0.766626	-12.8021	3.64799e-33	2.50045e-31	64.345	KIAA1671-AS1	down
PGM5P4	-0.70808	0.470903	-12.8018	3.65853e-33	2.50478e-31	64.3421	PGM5P4	down
CCDC141	-0.261181	0.207461	-12.8014	3.67322e-33	2.51195e-31	64.3381	CCDC141	no
LINC02648	-0.549265	0.25204	-12.7973	3.82528e-33	2.61293e-31	64.2978	LINC02648	down
AL513218.2	-0.345774	0.266498	-12.7956	3.8926e-33	2.65586e-31	64.2805	AL513218.2	no
AC068700.1	-0.773656	0.751422	-12.7946	3.93012e-33	2.67839e-31	64.271	AC068700.1	down
DENND6A	-1.13594	4.16981	-12.7934	3.98054e-33	2.70964e-31	64.2583	DENND6A	down
AC015983.2	-0.424697	0.203374	-12.7931	3.99196e-33	2.71431e-31	64.2555	AC015983.2	no
UCHL5	-0.9006	3.03498	-12.792	4.03489e-33	2.74036e-31	64.2449	UCHL5	down
DES	-2.55666	1.85023	-12.7915	4.05431e-33	2.7504e-31	64.2401	DES	down
GNL2P1	-0.0794215	0.0213555	-12.7875	4.2191e-33	2.85893e-31	64.2006	GNL2P1	no
BRSK2	-0.799409	0.556087	-12.7849	4.33027e-33	2.93092e-31	64.1747	BRSK2	down
AC079142.1	-0.651937	0.840684	-12.7844	4.35311e-33	2.94303e-31	64.1695	AC079142.1	down
AC108734.4	-0.0893314	0.0393873	-12.7834	4.39591e-33	2.96859e-31	64.1598	AC108734.4	no
AL121749.2	-0.445146	0.333387	-12.7817	4.47408e-33	3.01795e-31	64.1423	AL121749.2	no
SYNDIG1	-2.10784	2.49862	-12.7811	4.50013e-33	3.03208e-31	64.1365	SYNDIG1	down
AC092338.2	-0.265677	0.173398	-12.7803	4.53744e-33	3.05375e-31	64.1283	AC092338.2	no
AC000085.1	-1.03999	1.10612	-12.7795	4.57353e-33	3.07456e-31	64.1205	AC000085.1	down
HEY2	1.73028	4.31885	12.7741	4.82465e-33	3.23971e-31	64.0674	HEY2	up
WASF3	-1.54959	3.03566	-12.7721	4.9242e-33	3.30283e-31	64.0471	WASF3	down
KCNQ3	2.28674	2.57127	12.7718	4.93902e-33	3.30903e-31	64.0442	KCNQ3	up
ETV5	1.54134	5.44334	12.764	5.33832e-33	3.57253e-31	63.967	ETV5	up
SMIM10L2B	-1.12061	1.96579	-12.7583	5.64758e-33	3.77524e-31	63.9111	SMIM10L2B	down
SRF	-1.27977	5.67833	-12.7553	5.82398e-33	3.88878e-31	63.8805	SRF	down
CYTH3	-1.26994	4.85473	-12.7509	6.08332e-33	4.05739e-31	63.8373	CYTH3	down
CDH6	2.06964	3.12688	12.7487	6.21586e-33	4.14114e-31	63.8159	CDH6	up
CYP17A1	-0.971693	0.699905	-12.7479	6.26617e-33	4.16999e-31	63.8079	CYP17A1	down
PGA5	-0.807332	0.411888	-12.7458	6.39851e-33	4.25329e-31	63.7871	PGA5	down
EPHB3	2.32061	3.43023	12.7445	6.48368e-33	4.30509e-31	63.774	EPHB3	up
AC009132.1	-1.33526	0.810147	-12.7426	6.60792e-33	4.38269e-31	63.7552	AC009132.1	down
C16orf86	-1.13431	2.06296	-12.7416	6.67258e-33	4.42064e-31	63.7455	C16orf86	down
AC093843.1	-0.373587	0.148187	-12.7372	6.97482e-33	4.61573e-31	63.7015	AC093843.1	no
AL359643.2	-0.327874	0.362433	-12.722	8.11485e-33	5.3642e-31	63.5512	AL359643.2	no
PROS1	2.74811	6.66567	12.716	8.613e-33	5.68717e-31	63.4921	PROS1	up
FAM181A-AS1	-0.700371	0.452883	-12.7156	8.65495e-33	5.70852e-31	63.4873	FAM181A-AS1	down
E2F3P2	-0.347233	0.220785	-12.7119	8.97263e-33	5.91149e-31	63.4515	E2F3P2	no
AL353719.1	-0.76462	0.724865	-12.7103	9.11707e-33	6e-31	63.4356	AL353719.1	down
HSPB6	-1.48104	1.45168	-12.7081	9.32454e-33	6.12975e-31	63.4133	HSPB6	down
C1orf158	-0.62982	0.220071	-12.7053	9.58435e-33	6.29358e-31	63.386	C1orf158	down
AC008659.1	-0.162769	0.0705567	-12.7018	9.9239e-33	6.50936e-31	63.3515	AC008659.1	no
LIPI	-1.92457	0.829493	-12.6987	1.0236e-32	6.70666e-31	63.3207	LIPI	down
FHOD1	1.16532	5.10247	12.6979	1.03189e-32	6.75353e-31	63.3127	FHOD1	up
AC006115.2	-0.0661209	0.0609856	-12.6977	1.03366e-32	6.75765e-31	63.311	AC006115.2	no
KRT87P	-1.48778	1.80746	-12.697	1.04117e-32	6.79581e-31	63.3038	KRT87P	down
LINC02292	-0.0914309	0.0278357	-12.697	1.04178e-32	6.79581e-31	63.3032	LINC02292	no
AC068733.3	-0.119948	0.0887192	-12.6865	1.15658e-32	7.53644e-31	63.1995	AC068733.3	no
B4GALNT2	-1.80819	1.19427	-12.6822	1.20699e-32	7.85629e-31	63.1571	B4GALNT2	down
RYR1	1.83852	2.67502	12.6766	1.27612e-32	8.29715e-31	63.1018	RYR1	up
AC012414.4	-0.515738	0.357438	-12.6739	1.3102e-32	8.5094e-31	63.0757	AC012414.4	down
ARNILA	-0.828012	0.916352	-12.6723	1.33104e-32	8.63537e-31	63.06	ARNILA	down
B3GALT2	-1.41136	0.66412	-12.6579	1.53682e-32	9.95951e-31	62.9173	B3GALT2	down
SNRK-AS1	-0.861416	0.981078	-12.6569	1.55216e-32	1.0048e-30	62.9074	SNRK-AS1	down
MIR34AHG	1.09179	1.87973	12.6544	1.59086e-32	1.02873e-30	62.883	MIR34AHG	up
SLC26A7	-3.45739	6.07074	-12.654	1.59732e-32	1.03178e-30	62.879	SLC26A7	down
TNXB	-1.442	2.09436	-12.652	1.62993e-32	1.0517e-30	62.8589	TNXB	down
AF067845.1	-0.836537	0.399661	-12.648	1.6956e-32	1.09289e-30	62.8197	AF067845.1	down
AC253536.3	-1.35614	1.16181	-12.6458	1.73264e-32	1.11555e-30	62.7982	AC253536.3	down
TBX1	-1.23154	1.12466	-12.6447	1.75152e-32	1.12649e-30	62.7875	TBX1	down
CENPJ	-1.56127	2.76207	-12.6438	1.76819e-32	1.13547e-30	62.7781	CENPJ	down
SAP30-DT	-0.408683	0.550616	-12.6437	1.76931e-32	1.13547e-30	62.7775	SAP30-DT	no
ANKRD37	-1.32175	2.51894	-12.6418	1.80407e-32	1.15653e-30	62.7581	ANKRD37	down
SV2B	-0.355725	0.196302	-12.6407	1.82359e-32	1.16679e-30	62.7475	SV2B	no
AC103853.2	-0.211141	0.0901611	-12.6407	1.824e-32	1.16679e-30	62.7472	AC103853.2	no
LRRK2	3.07364	5.21812	12.6348	1.9323e-32	1.23474e-30	62.69	LRRK2	up
AC025280.1	-0.528342	0.226461	-12.6337	1.95469e-32	1.24771e-30	62.6785	AC025280.1	down
MAMDC2	-1.66906	2.29642	-12.6331	1.9663e-32	1.25377e-30	62.6727	MAMDC2	down
TEDDM1	-0.261623	0.103348	-12.6329	1.97057e-32	1.25514e-30	62.6705	TEDDM1	no
TGFB1	1.44465	5.99046	12.6224	2.18697e-32	1.39149e-30	62.5671	TGFB1	up
TCEAL9	-1.04266	6.61164	-12.6216	2.20386e-32	1.40074e-30	62.5595	TCEAL9	down
AL606537.1	-0.099047	0.0323469	-12.6206	2.22564e-32	1.41307e-30	62.5497	AL606537.1	no
AC135977.1	-0.731935	0.711351	-12.6183	2.27736e-32	1.44329e-30	62.5269	AC135977.1	down
S100A11	1.37384	10.4384	12.6183	2.27811e-32	1.44329e-30	62.5266	S100A11	up
AC020584.1	-0.709098	0.254592	-12.6144	2.36649e-32	1.49769e-30	62.4888	AC020584.1	down
MANEAL	1.17833	2.84184	12.6092	2.4922e-32	1.57557e-30	62.4374	MANEAL	up
AP004782.1	-0.41108	0.248483	-12.609	2.49878e-32	1.57805e-30	62.4348	AP004782.1	no
AC127526.4	-0.675261	0.65967	-12.6073	2.54045e-32	1.60267e-30	62.4184	AC127526.4	down
USP49	-1.08991	1.76864	-12.605	2.59786e-32	1.63715e-30	62.3962	USP49	down
RASD2	2.24217	3.91561	12.6024	2.66661e-32	1.67869e-30	62.3703	RASD2	up
BX539320.1	-1.15955	1.4059	-12.5945	2.88496e-32	1.81423e-30	62.2921	BX539320.1	down
CLVS1	-0.276367	0.168564	-12.5905	3.00066e-32	1.88499e-30	62.2531	CLVS1	no
AC012485.2	-0.15004	0.0311277	-12.5863	3.12752e-32	1.96261e-30	62.212	AC012485.2	no
RPL37A-DT	-0.566995	0.769318	-12.5857	3.14552e-32	1.97182e-30	62.2063	RPL37A-DT	down
AC025809.1	-0.816058	0.656206	-12.5816	3.27775e-32	2.05255e-30	62.1654	AC025809.1	down
EIF1B-AS1	-0.302683	0.591787	-12.578	3.397e-32	2.12498e-30	62.13	EIF1B-AS1	no
DIO3	-0.913635	0.475519	-12.5772	3.42438e-32	2.13986e-30	62.122	DIO3	down
RGS9	-0.982456	1.28432	-12.5768	3.43703e-32	2.14551e-30	62.1183	RGS9	down
AC137936.2	-0.463227	0.407706	-12.5578	4.14779e-32	2.58647e-30	61.9318	AC137936.2	no
CCDC160	-0.515143	0.344126	-12.5523	4.38244e-32	2.72993e-30	61.8771	CCDC160	down
AC011700.1	-0.716458	0.411192	-12.5506	4.45663e-32	2.77324e-30	61.8605	AC011700.1	down
KIZ	-1.08943	3.78491	-12.5476	4.58906e-32	2.85266e-30	61.8314	KIZ	down
AL049874.3	-0.288154	0.124667	-12.5467	4.62983e-32	2.87499e-30	61.8226	AL049874.3	no
AL360268.1	-0.238617	0.0811926	-12.5381	5.04219e-32	3.12779e-30	61.738	AL360268.1	no
AC092718.1	-0.573164	0.577191	-12.5321	5.34956e-32	3.315e-30	61.6792	AC092718.1	down
ADRA1B	1.48945	2.44434	12.5316	5.37455e-32	3.32701e-30	61.6746	ADRA1B	up
TMPRSS3	-1.77742	1.7194	-12.5306	5.43002e-32	3.35785e-30	61.6644	TMPRSS3	down
RIN1	1.37248	2.26459	12.5252	5.72546e-32	3.53687e-30	61.6118	RIN1	up
STX11	-1.37136	2.60009	-12.5245	5.76938e-32	3.5603e-30	61.6042	STX11	down
SPINT1	1.34857	7.70412	12.5213	5.95189e-32	3.66912e-30	61.5733	SPINT1	up
TAPT1	-0.865023	3.85152	-12.5102	6.64268e-32	4.09072e-30	61.4643	TAPT1	down
PLAC9P1	-0.605882	0.341499	-12.5058	6.93794e-32	4.26813e-30	61.4212	PLAC9P1	down
DIO3OS	-0.603506	0.291105	-12.5043	7.04058e-32	4.32679e-30	61.4066	DIO3OS	down
AL118505.1	-0.729887	0.378865	-12.5029	7.13644e-32	4.38117e-30	61.3932	AL118505.1	down
SHLD2	-0.937452	4.27542	-12.5011	7.26468e-32	4.4553e-30	61.3755	SHLD2	down
LINC01257	-1.09381	0.505878	-12.4929	7.8774e-32	4.82609e-30	61.2951	LINC01257	down
UNC5B-AS1	1.94098	1.97596	12.492	7.95242e-32	4.86703e-30	61.2857	UNC5B-AS1	up
AF186192.2	-1.23706	2.43785	-12.4857	8.45814e-32	5.17121e-30	61.2245	AF186192.2	down
AL133372.2	-0.0416504	0.00892694	-12.484	8.60225e-32	5.25391e-30	61.2078	AL133372.2	no
AL022069.1	-0.511888	0.40606	-12.4751	9.38931e-32	5.72873e-30	61.1209	AL022069.1	down
AC083855.2	1.02267	2.54774	12.4744	9.4558e-32	5.76338e-30	61.1139	AC083855.2	up
LAMA2	-1.48295	1.51351	-12.4737	9.52574e-32	5.80006e-30	61.1065	LAMA2	down
NDNF	-0.877483	0.688195	-12.4735	9.54111e-32	5.80348e-30	61.1049	NDNF	down
PDGFA	0.971824	3.47064	12.4724	9.64344e-32	5.85972e-30	61.0944	PDGFA	up
AC074031.1	-0.138323	0.0339385	-12.4622	1.06705e-31	6.4772e-30	60.9939	AC074031.1	no
HBB	-2.67496	5.80952	-12.4614	1.07524e-31	6.52026e-30	60.9863	HBB	down
KLK4	-2.12035	1.42017	-12.4593	1.09722e-31	6.64675e-30	60.9662	KLK4	down
LMX1A	-0.164796	0.065478	-12.4547	1.14898e-31	6.95318e-30	60.9205	LMX1A	no
CDON	-2.10432	2.63453	-12.4517	1.18333e-31	7.1538e-30	60.8913	CDON	down
AC073911.2	-0.509223	0.351422	-12.446	1.25172e-31	7.55958e-30	60.8355	AC073911.2	down
AL158829.1	-0.793401	0.322391	-12.4413	1.31098e-31	7.90943e-30	60.7896	AL158829.1	down
AC245014.3	-0.863086	0.70072	-12.4411	1.31379e-31	7.91834e-30	60.7875	AC245014.3	down
GABRD	1.66332	2.06073	12.4381	1.3528e-31	8.14517e-30	60.7584	GABRD	up
AP000344.1	-0.698704	0.340802	-12.4333	1.41836e-31	8.53124e-30	60.7115	AP000344.1	down
RNVU1-8	-0.555601	0.134901	-12.4297	1.46964e-31	8.83077e-30	60.6762	RNVU1-8	down
AC072022.2	-0.684153	0.657493	-12.4265	1.51652e-31	9.10325e-30	60.645	AC072022.2	down
ALDH3B1	1.90897	3.99303	12.4213	1.59605e-31	9.57099e-30	60.5943	ALDH3B1	up
CCDC85A	-1.4597	1.70779	-12.4111	1.76363e-31	1.05653e-29	60.4952	CCDC85A	down
MIR7-2	-1.12419	0.403025	-12.4079	1.82152e-31	1.0901e-29	60.4632	MIR7-2	down
C16orf71	-0.775741	0.897868	-12.4067	1.84287e-31	1.10177e-29	60.4516	C16orf71	down
LINC00167	-0.377836	0.294855	-12.3998	1.97208e-31	1.17784e-29	60.3844	LINC00167	no
TNFAIP8L3	-1.23138	1.69605	-12.3986	1.99487e-31	1.19025e-29	60.3729	TNFAIP8L3	down
WDR38	-0.663166	0.487257	-12.3965	2.03607e-31	1.21362e-29	60.3527	WDR38	down
FAM180A	-1.15118	0.841958	-12.3955	2.05727e-31	1.22502e-29	60.3424	FAM180A	down
AC121247.1	-0.655224	0.66572	-12.3947	2.07263e-31	1.23293e-29	60.335	AC121247.1	down
AC084375.1	1.69813	2.61864	12.3904	2.16319e-31	1.28552e-29	60.2926	AC084375.1	up
CFAP46	-1.04731	1.39643	-12.3835	2.31318e-31	1.37328e-29	60.226	CFAP46	down
NUP62CL	-1.12475	2.93224	-12.3775	2.45548e-31	1.45631e-29	60.1668	NUP62CL	down
FAM189A1	-1.96624	1.71945	-12.3736	2.54961e-31	1.51062e-29	60.1294	FAM189A1	down
SETBP1-DT	-0.78217	1.40355	-12.371	2.61537e-31	1.54804e-29	60.1042	SETBP1-DT	down
ARHGAP31-AS1	-0.986529	1.60295	-12.3681	2.69241e-31	1.59206e-29	60.0754	ARHGAP31-AS1	down
NUDT9P1	-0.756389	1.21598	-12.3676	2.70563e-31	1.59829e-29	60.0705	NUDT9P1	down
HCN4	1.422	1.41298	12.3646	2.78595e-31	1.6441e-29	60.0415	HCN4	up
LRGUK	-0.602238	0.490873	-12.3563	3.02287e-31	1.78214e-29	59.9605	LRGUK	down
AC106795.2	-1.45532	1.3836	-12.3545	3.0758e-31	1.81155e-29	59.9432	AC106795.2	down
LINC02555	3.40234	3.38069	12.3534	3.11004e-31	1.82991e-29	59.9323	LINC02555	up
AC002057.2	-0.289171	0.0625144	-12.3523	3.14233e-31	1.84707e-29	59.922	AC002057.2	no
PRELID3A	1.31993	2.76759	12.344	3.41073e-31	2.00286e-29	59.8407	PRELID3A	up
OMD	-2.37207	1.8308	-12.343	3.44465e-31	2.02078e-29	59.8309	OMD	down
RNASET2	-0.884282	2.64462	-12.3397	3.55797e-31	2.0852e-29	59.7987	RNASET2	down
AC107953.2	-0.180063	0.092276	-12.3362	3.67982e-31	2.15449e-29	59.7653	AC107953.2	no
AL031666.2	-0.296316	0.192787	-12.3361	3.68464e-31	2.15519e-29	59.764	AL031666.2	no
LRRC8C-DT	-0.290117	0.412037	-12.335	3.72351e-31	2.17578e-29	59.7536	LRRC8C-DT	no
CIR1P2	-0.113048	0.038739	-12.3323	3.82623e-31	2.23361e-29	59.7266	CIR1P2	no
AC093510.1	-0.538373	0.485373	-12.3314	3.85738e-31	2.24958e-29	59.7185	AC093510.1	down
MYZAP	-0.664194	0.829897	-12.3307	3.88564e-31	2.26384e-29	59.7113	MYZAP	down
MIR3178	-1.3854	1.03947	-12.3303	3.9007e-31	2.27039e-29	59.7075	MIR3178	down
SYTL5	3.06855	3.14233	12.3263	4.05613e-31	2.35855e-29	59.6687	SYTL5	up
FXYD5	1.71764	6.51794	12.3244	4.13417e-31	2.40158e-29	59.6498	FXYD5	up
AC092803.1	-1.18559	2.51979	-12.3156	4.50371e-31	2.61369e-29	59.5648	AC092803.1	down
L1TD1	-0.428298	0.260692	-12.3113	4.69744e-31	2.72346e-29	59.523	L1TD1	no
AC093797.1	-1.52546	1.26135	-12.3092	4.79737e-31	2.77869e-29	59.5021	AC093797.1	down
AC010735.1	-0.812649	0.516824	-12.2971	5.39619e-31	3.12249e-29	59.3854	AC010735.1	down
AC012378.2	-1.21662	2.30382	-12.2968	5.41378e-31	3.12962e-29	59.3822	AC012378.2	down
RNU6-768P	-0.864075	0.303143	-12.2954	5.48902e-31	3.16777e-29	59.3685	RNU6-768P	down
MFAP4	-2.98809	4.01901	-12.2954	5.49043e-31	3.16777e-29	59.3682	MFAP4	down
AC063960.1	-1.03709	0.938852	-12.294	5.5666e-31	3.20859e-29	59.3546	AC063960.1	down
IP6K3	-2.27637	2.68155	-12.2904	5.76616e-31	3.3204e-29	59.3196	IP6K3	down
AC078899.3	-2.07995	3.17495	-12.2902	5.77383e-31	3.3216e-29	59.3183	AC078899.3	down
BMP1	1.20835	5.28039	12.2892	5.83306e-31	3.35243e-29	59.3082	BMP1	up
GOLGA8VP	-0.928083	1.00348	-12.2875	5.93002e-31	3.40487e-29	59.2918	GOLGA8VP	down
RGS16	-1.8775	6.42432	-12.2858	6.03139e-31	3.45972e-29	59.275	RGS16	down
NCS1	-1.19052	5.23579	-12.2785	6.47816e-31	3.71241e-29	59.2041	NCS1	down
MTHFD1L	1.07209	4.35477	12.2779	6.51207e-31	3.72825e-29	59.1989	MTHFD1L	up
HEMGN	-0.535072	0.227885	-12.2745	6.73204e-31	3.85048e-29	59.1659	HEMGN	down
AL355304.1	-0.298956	0.28004	-12.2705	7.0025e-31	4.00132e-29	59.1268	AL355304.1	no
WAKMAR2	-0.602665	0.904121	-12.2688	7.11895e-31	4.06396e-29	59.1105	WAKMAR2	down
ESR2	-0.291222	0.363781	-12.2638	7.47249e-31	4.26168e-29	59.0624	ESR2	no
AC108063.2	-0.128051	0.0265726	-12.2618	7.62237e-31	4.343e-29	59.0427	AC108063.2	no
AL731553.1	-0.443615	0.306532	-12.2615	7.64215e-31	4.35009e-29	59.0401	AL731553.1	no
TMEM164	-1.26107	4.21545	-12.2563	8.04357e-31	4.57421e-29	58.9893	TMEM164	down
CLSTN2	-0.967212	0.643397	-12.256	8.07067e-31	4.58523e-29	58.986	CLSTN2	down
SLC7A6	-0.998523	1.75249	-12.2511	8.46559e-31	4.80501e-29	58.9385	SLC7A6	down
ESRRG	-1.24089	1.49331	-12.2502	8.5409e-31	4.84313e-29	58.9298	ESRRG	down
AP001830.1	-1.19789	2.69539	-12.2498	8.56963e-31	4.85479e-29	58.9264	AP001830.1	down
ACSM2B	-0.113605	0.0382947	-12.2474	8.77216e-31	4.96479e-29	58.9033	ACSM2B	no
MAGI2	-0.709248	1.34996	-12.2433	9.13065e-31	5.16277e-29	58.8635	MAGI2	down
BCL2L11	-1.10435	4.07885	-12.243	9.16289e-31	5.17608e-29	58.86	BCL2L11	down
AC010271.1	-0.700133	0.601946	-12.2392	9.50465e-31	5.36404e-29	58.8237	AC010271.1	down
AP003717.4	-0.153882	0.0946777	-12.2381	9.60983e-31	5.41825e-29	58.8128	AP003717.4	no
WWC2-AS2	-0.812903	1.2859	-12.2378	9.63286e-31	5.42608e-29	58.8104	WWC2-AS2	down
AC096741.1	-0.224496	0.0924645	-12.2359	9.81745e-31	5.52482e-29	58.7915	AC096741.1	no
CATIP-AS2	-1.17772	0.988323	-12.2324	1.01592e-30	5.71175e-29	58.7576	CATIP-AS2	down
AC141930.2	-3.35721	2.1673	-12.2309	1.0303e-30	5.78713e-29	58.7436	AC141930.2	down
ICAM5	2.52402	3.29843	12.2299	1.04034e-30	5.83801e-29	58.734	ICAM5	up
SYNDIG1L	1.57653	1.76128	12.2258	1.0837e-30	6.07554e-29	58.6935	SYNDIG1L	up
PGM5	-1.32826	2.02797	-12.2237	1.10605e-30	6.19503e-29	58.6732	PGM5	down
PCBP1-AS1	-0.533293	1.22443	-12.2228	1.11567e-30	6.24305e-29	58.6646	PCBP1-AS1	down
CCDC175	-0.0816892	0.0241784	-12.2134	1.22268e-30	6.83537e-29	58.5738	CCDC175	no
SLC25A5-AS1	-0.859308	1.83574	-12.21	1.2641e-30	7.06031e-29	58.5407	SLC25A5-AS1	down
EDRF1-DT	-0.441925	0.430645	-12.2087	1.27964e-30	7.14041e-29	58.5286	EDRF1-DT	no
CAMK2N2	1.59157	1.97337	12.2066	1.30586e-30	7.27988e-29	58.5085	CAMK2N2	up
PWWP3B	-2.45366	2.51637	-12.2063	1.30971e-30	7.29449e-29	58.5055	PWWP3B	down
CYP7B1	-1.58591	3.27711	-12.2045	1.33268e-30	7.41546e-29	58.4883	CYP7B1	down
AC092903.1	-0.865297	0.39865	-12.2039	1.34077e-30	7.45351e-29	58.4823	AC092903.1	down
AC087269.3	-0.383578	0.123344	-12.2037	1.3432e-30	7.46006e-29	58.4805	AC087269.3	no
BX842568.3	-1.52741	1.11806	-12.1978	1.42347e-30	7.89844e-29	58.4229	BX842568.3	down
ELAPOR1	-2.50148	1.97464	-12.1944	1.47145e-30	8.15708e-29	58.39	ELAPOR1	down
EFEMP1	-2.30494	5.67418	-12.1943	1.47314e-30	8.15882e-29	58.3889	EFEMP1	down
AL121935.2	-0.494631	0.294786	-12.1856	1.60186e-30	8.86347e-29	58.3057	AL121935.2	no
RPL4P6	-0.364729	0.40423	-12.1842	1.62521e-30	8.98429e-29	58.2914	RPL4P6	no
NLGN3	-0.56608	0.595008	-12.1833	1.63927e-30	9.0536e-29	58.2828	NLGN3	down
AL139280.1	-0.111557	0.0401231	-12.1832	1.64115e-30	9.05557e-29	58.2817	AL139280.1	no
TEKT3	-0.582963	0.55621	-12.183	1.64382e-30	9.0619e-29	58.2801	TEKT3	down
UBE2QL1	1.7784	3.40831	12.1806	1.68319e-30	9.27036e-29	58.2566	UBE2QL1	up
AC105910.1	-0.288763	0.12247	-12.1804	1.68654e-30	9.28019e-29	58.2546	AC105910.1	no
MAD2L2	0.953234	4.6745	12.1786	1.71529e-30	9.42964e-29	58.2379	MAD2L2	up
ZNF781	-1.01075	1.377	-12.1748	1.78055e-30	9.77939e-29	58.2008	ZNF781	down
SERTM1	-2.46539	1.50659	-12.168	1.90166e-30	1.04349e-28	58.1355	SERTM1	down
GAS2	-0.517173	0.906921	-12.1664	1.93197e-30	1.05915e-28	58.1198	GAS2	down
ARHGEF28	-1.5324	2.44264	-12.1566	2.12545e-30	1.16414e-28	58.0251	ARHGEF28	down
CAPN6	-1.96193	1.42164	-12.1558	2.14208e-30	1.17216e-28	58.0174	CAPN6	down
NCAM1	-2.45126	2.9666	-12.1542	2.17577e-30	1.18951e-28	58.0019	NCAM1	down
AC009970.1	-0.314108	0.108529	-12.1534	2.19276e-30	1.19769e-28	57.9942	AC009970.1	no
BMP2	-1.86601	4.58333	-12.153	2.19942e-30	1.20023e-28	57.9912	BMP2	down
CNTN1	-1.09056	0.569435	-12.152	2.2217e-30	1.21117e-28	57.9812	CNTN1	down
NCK1-DT	-0.462681	0.962199	-12.1519	2.22354e-30	1.21117e-28	57.9804	NCK1-DT	no
LINC00602	-0.248417	0.078677	-12.1511	2.24191e-30	1.22005e-28	57.9722	LINC00602	no
SLC25A15P3	-1.02833	0.423947	-12.1496	2.27445e-30	1.23663e-28	57.9579	SLC25A15P3	down
MIR138-1	-1.75048	1.15722	-12.1459	2.3584e-30	1.2811e-28	57.9219	MIR138-1	down
AL513164.1	-0.310002	0.0941902	-12.145	2.37728e-30	1.29018e-28	57.914	AL513164.1	no
PRKX	-1.50759	5.07257	-12.143	2.42501e-30	1.31488e-28	57.8943	PRKX	down
AC005593.1	-0.588259	0.474646	-12.141	2.47152e-30	1.33888e-28	57.8754	AC005593.1	down
SNCA	-0.995419	1.28848	-12.1372	2.56582e-30	1.3887e-28	57.8383	SNCA	down
ATXN7L1	-0.779584	2.18979	-12.1344	2.63704e-30	1.42595e-28	57.8111	ATXN7L1	down
TIAM1	2.17524	3.61243	12.1341	2.64392e-30	1.42837e-28	57.8085	TIAM1	up
AK1	1.32103	4.45538	12.126	2.85913e-30	1.54323e-28	57.7309	AK1	up
AC243960.3	-0.690961	0.575733	-12.119	3.06014e-30	1.65023e-28	57.6635	AC243960.3	down
SYTL3	-1.39379	4.72466	-12.116	3.15157e-30	1.69799e-28	57.6343	SYTL3	down
KCNJ2	2.47961	3.56752	12.1094	3.35949e-30	1.80837e-28	57.5709	KCNJ2	up
FRAS1	-1.70674	2.65175	-12.1017	3.62066e-30	1.94719e-28	57.4966	FRAS1	down
TGFBR3	-1.19475	2.98363	-12.0997	3.69244e-30	1.984e-28	57.4771	TGFBR3	down
TLE1P1	-0.928688	1.13405	-12.0953	3.85348e-30	2.06866e-28	57.4348	TLE1P1	down
SMAD9	-1.91975	4.36597	-12.0951	3.85816e-30	2.0693e-28	57.4336	SMAD9	down
B3GNT7	1.88895	3.92634	12.0929	3.94191e-30	2.11231e-28	57.4123	B3GNT7	up
LINC01126	-0.786371	0.740728	-12.0883	4.12426e-30	2.20804e-28	57.3674	LINC01126	down
LRRK2-DT	2.83645	4.3831	12.0874	4.15761e-30	2.22389e-28	57.3594	LRRK2-DT	up
AC008676.3	-0.10029	0.0551046	-12.0867	4.18638e-30	2.23726e-28	57.3526	AC008676.3	no
RNU6-242P	-0.772311	0.305312	-12.0826	4.3549e-30	2.32524e-28	57.3134	RNU6-242P	down
AC096734.2	-1.11634	1.19307	-12.0819	4.38767e-30	2.34063e-28	57.306	AC096734.2	down
BMP8A	-3.90126	3.65846	-12.0756	4.66342e-30	2.4855e-28	57.2455	BMP8A	down
BTNL8	-0.424083	0.269102	-12.0725	4.80638e-30	2.55939e-28	57.2156	BTNL8	no
AL358852.1	-0.824498	1.3511	-12.0709	4.88117e-30	2.5969e-28	57.2002	AL358852.1	down
AMN	-0.711317	0.51824	-12.0705	4.89995e-30	2.60456e-28	57.1964	AMN	down
SH3RF1	-1.28262	4.49885	-12.0684	4.99829e-30	2.65446e-28	57.1767	SH3RF1	down
TCEAL2	-2.9497	3.22852	-12.0568	5.59017e-30	2.96613e-28	57.0657	TCEAL2	down
TPD52L1	1.44996	5.45199	12.0549	5.6979e-30	3.0206e-28	57.0467	TPD52L1	up
CLDN1	3.12476	7.72429	12.053	5.79993e-30	3.07195e-28	57.0291	CLDN1	up
VEPH1	-0.696688	0.728072	-12.0507	5.93509e-30	3.14073e-28	57.0063	VEPH1	down
FBLN1	-2.62784	3.927	-12.0502	5.9609e-30	3.15159e-28	57.002	FBLN1	down
AC022893.1	-0.490852	0.486434	-12.0497	5.98759e-30	3.16288e-28	56.9975	AC022893.1	no
AC097504.2	-1.28015	1.68898	-12.048	6.08944e-30	3.21383e-28	56.9808	AC097504.2	down
AL627232.1	-0.222356	0.0921023	-12.0478	6.09906e-30	3.21605e-28	56.9792	AL627232.1	no
PAK5	-0.178555	0.090817	-12.0454	6.24254e-30	3.28879e-28	56.9562	PAK5	no
TAS2R63P	-0.182133	0.0781589	-12.0438	6.34478e-30	3.33969e-28	56.9401	TAS2R63P	no
AC092353.1	-0.11803	0.0538724	-12.042	6.45554e-30	3.39499e-28	56.9229	AC092353.1	no
AC126773.4	0.991826	1.3332	12.0377	6.72439e-30	3.53325e-28	56.8824	AC126773.4	up
AC092155.1	-0.0425777	0.0184691	-12.0272	7.44405e-30	3.90793e-28	56.7815	AC092155.1	no
SEMA6B	1.25554	3.08777	12.017	8.21494e-30	4.30882e-28	56.6838	SEMA6B	up
AC006042.2	-0.834403	0.759615	-12.0154	8.34741e-30	4.37444e-28	56.6679	AC006042.2	down
AL512590.3	-0.171032	0.105606	-12.0086	8.91155e-30	4.66596e-28	56.603	AL512590.3	no
C11orf80	1.15977	3.49618	12.0005	9.6305e-30	5.03796e-28	56.5261	C11orf80	up
MYLK4	-0.618986	0.990267	-11.997	9.96738e-30	5.2096e-28	56.492	MYLK4	down
C9orf24	-0.925906	0.725389	-11.9943	1.02305e-29	5.34245e-28	56.4661	C9orf24	down
AC097376.3	-0.608928	1.4805	-11.9861	1.10643e-29	5.77276e-28	56.3884	AC097376.3	down
ARHGEF33	-0.394728	0.526519	-11.9852	1.11661e-29	5.82076e-28	56.3793	ARHGEF33	no
NOX4	1.31377	1.97243	11.9849	1.11942e-29	5.8303e-28	56.3768	NOX4	up
SOD2-OT1	-0.391761	0.431435	-11.9725	1.26165e-29	6.56535e-28	56.2581	SOD2-OT1	no
PRKN	-0.550288	1.0018	-11.9665	1.33765e-29	6.9547e-28	56.2001	PRKN	down
HGD	-2.9643	3.90457	-11.9629	1.38428e-29	7.19086e-28	56.1661	HGD	down
TMEM184A	1.53922	2.09116	11.9627	1.38674e-29	7.19194e-28	56.1644	TMEM184A	up
BCO1	-0.311335	0.142344	-11.9627	1.38691e-29	7.19194e-28	56.1642	BCO1	no
C16orf96	-0.585596	0.606793	-11.9625	1.38892e-29	7.1961e-28	56.1628	C16orf96	down
SELENOKP3	-0.109501	0.0444391	-11.9622	1.39373e-29	7.21476e-28	56.1594	SELENOKP3	no
U3	-0.119521	0.114595	-11.9583	1.447e-29	7.48399e-28	56.1222	U3	no
AL449403.1	-0.178908	0.0778465	-11.9545	1.50153e-29	7.75927e-28	56.0855	AL449403.1	no
Z70719.1	-0.500053	0.195421	-11.9515	1.54494e-29	7.97666e-28	56.0572	Z70719.1	down
AC120498.1	-1.30767	0.812897	-11.9498	1.57067e-29	8.10246e-28	56.0408	AC120498.1	down
AL008628.1	-0.260026	0.0801653	-11.9488	1.58587e-29	8.17375e-28	56.0313	AL008628.1	no
DUBR	-0.486596	1.1962	-11.9464	1.62297e-29	8.35774e-28	56.0083	DUBR	no
FGF10-AS1	-0.0935306	0.0275165	-11.9457	1.63315e-29	8.40288e-28	56.0021	FGF10-AS1	no
EPM2A	-0.503801	1.14348	-11.9391	1.74053e-29	8.94761e-28	55.9389	EPM2A	down
UPP1	1.66509	4.91775	11.9366	1.78291e-29	9.15757e-28	55.9151	UPP1	up
TECTA	-0.558974	0.803155	-11.9362	1.79043e-29	9.18825e-28	55.9109	TECTA	down
LINC01977	1.20044	1.2918	11.934	1.82804e-29	9.37103e-28	55.8903	LINC01977	up
UNC5A	-0.437532	0.291221	-11.9339	1.8292e-29	9.37103e-28	55.8896	UNC5A	no
AC011247.1	-0.97779	1.12511	-11.9321	1.8626e-29	9.53392e-28	55.8717	AC011247.1	down
ZNF157	-0.514192	0.633917	-11.9316	1.87043e-29	9.56577e-28	55.8675	ZNF157	down
AC027237.3	-0.662157	0.884409	-11.9255	1.9835e-29	1.01353e-27	55.8093	AC027237.3	down
AP000944.7	-0.862486	1.84404	-11.9213	2.06603e-29	1.05479e-27	55.7689	AP000944.7	down
AC124242.1	-0.783656	1.45207	-11.9199	2.09297e-29	1.06763e-27	55.756	AC124242.1	down
AC138356.2	-1.25599	2.22097	-11.9132	2.23186e-29	1.1375e-27	55.6923	AC138356.2	down
RUNX1	1.80571	3.19958	11.9069	2.37283e-29	1.20831e-27	55.6315	RUNX1	up
EDIL3	1.4361	3.16532	11.9064	2.38307e-29	1.21249e-27	55.6273	EDIL3	up
DUSP6	2.11214	7.95698	11.9058	2.39751e-29	1.21879e-27	55.6213	DUSP6	up
RAP1GAP	-2.04882	6.26858	-11.9054	2.4057e-29	1.22191e-27	55.6179	RAP1GAP	down
AC027329.1	-0.0328341	0.0122347	-11.9052	2.4113e-29	1.22341e-27	55.6156	AC027329.1	no
AC138028.2	-0.395136	0.411127	-11.9051	2.41277e-29	1.22341e-27	55.615	AC138028.2	no
ELFN1	0.972507	1.61682	11.9048	2.41979e-29	1.22592e-27	55.6121	ELFN1	up
LINC00539	-0.566437	0.977078	-11.8968	2.61437e-29	1.32337e-27	55.5354	LINC00539	down
PLEKHA2	-0.926796	4.38826	-11.8941	2.68141e-29	1.35615e-27	55.5103	PLEKHA2	down
AL355102.1	-0.700446	0.286762	-11.8937	2.69307e-29	1.36089e-27	55.506	AL355102.1	down
EDARADD	-1.38234	1.61024	-11.889	2.81652e-29	1.42207e-27	55.4615	EDARADD	down
AC008620.2	-0.246627	0.0458627	-11.8884	2.83393e-29	1.42964e-27	55.4554	AC008620.2	no
MYCNOS	-0.222138	0.139444	-11.8869	2.87421e-29	1.44873e-27	55.4414	MYCNOS	no
SRGAP3-AS4	-1.08839	1.25884	-11.8859	2.90044e-29	1.46072e-27	55.4324	SRGAP3-AS4	down
AC091563.1	-1.81789	4.89379	-11.8835	2.96875e-29	1.49385e-27	55.4093	AC091563.1	down
AC116317.1	-0.338374	0.235957	-11.8764	3.17682e-29	1.5972e-27	55.3421	AC116317.1	no
TMEM132C	-0.75617	0.305342	-11.8726	3.29679e-29	1.65611e-27	55.3053	TMEM132C	down
STX2	-0.9809	3.36805	-11.8725	3.30054e-29	1.6566e-27	55.3042	STX2	down
AP002856.4	-0.29666	0.0888286	-11.8714	3.33382e-29	1.67189e-27	55.2942	AP002856.4	no
BMERB1	1.44262	4.932	11.869	3.41305e-29	1.71018e-27	55.2709	BMERB1	up
FN1	4.3617	9.48267	11.866	3.51183e-29	1.75819e-27	55.2426	FN1	up
FBLN5	-1.45489	4.20786	-11.8631	3.61059e-29	1.80612e-27	55.2151	FBLN5	down
AL445531.1	-0.290378	0.208861	-11.8626	3.62722e-29	1.81291e-27	55.2106	AL445531.1	no
USP44	-0.732084	0.958833	-11.8617	3.65778e-29	1.82664e-27	55.2023	USP44	down
AC026341.1	-0.0986063	0.0947225	-11.8585	3.7738e-29	1.883e-27	55.1713	AC026341.1	no
SLC25A25	-1.52711	4.08361	-11.8533	3.96703e-29	1.97776e-27	55.1217	SLC25A25	down
MOB3B	-1.27948	2.81982	-11.85	4.09507e-29	2.03988e-27	55.0902	MOB3B	down
GRIN2C	-2.65484	2.36413	-11.8467	4.22525e-29	2.10297e-27	55.0592	GRIN2C	down
AC113167.1	-0.0389109	0.0160852	-11.8306	4.92686e-29	2.45011e-27	54.9068	AC113167.1	no
ZNF197-AS1	-0.745595	1.12743	-11.8236	5.27e-29	2.61856e-27	54.84	ZNF197-AS1	down
AC004825.2	-1.23482	2.32046	-11.8215	5.37636e-29	2.66918e-27	54.8202	AC004825.2	down
AL157700.1	-0.641579	0.729766	-11.8191	5.50142e-29	2.72899e-27	54.7974	AL157700.1	down
AL627171.1	-0.367067	0.294111	-11.8183	5.54262e-29	2.74714e-27	54.79	AL627171.1	no
AC096887.2	-0.547747	0.781276	-11.8165	5.63819e-29	2.79217e-27	54.7731	AC096887.2	down
SOD3	-2.38238	6.12856	-11.8161	5.66316e-29	2.80221e-27	54.7687	SOD3	down
IER5L	1.69066	3.63062	11.8135	5.80261e-29	2.86882e-27	54.7445	IER5L	up
AC092718.3	-0.793014	1.30427	-11.8098	6.01117e-29	2.96946e-27	54.7095	AC092718.3	down
AC016737.2	-0.829011	0.531952	-11.8097	6.01757e-29	2.97015e-27	54.7085	AC016737.2	down
HSBP1	-0.767433	5.40699	-11.8065	6.20637e-29	3.0608e-27	54.6778	HSBP1	down
GEMIN8P4	-0.829829	1.6074	-11.8029	6.42208e-29	3.16225e-27	54.6439	GEMIN8P4	down
AC020911.2	-0.162614	0.0622626	-11.8029	6.42274e-29	3.16225e-27	54.6438	AC020911.2	no
ZBTB21	-1.07429	3.12364	-11.8014	6.51773e-29	3.20637e-27	54.6293	ZBTB21	down
AC092745.5	-0.66574	0.89099	-11.8012	6.52716e-29	3.20835e-27	54.6278	AC092745.5	down
CCM2	0.819301	4.62286	11.8009	6.54822e-29	3.21604e-27	54.6246	CCM2	up
AC067930.9	-0.562414	0.814362	-11.7988	6.68098e-29	3.27853e-27	54.6047	AC067930.9	down
AC127455.1	-1.25043	1.11208	-11.7961	6.85562e-29	3.36146e-27	54.5791	AC127455.1	down
MIR3189	2.47798	2.62797	11.7852	7.60611e-29	3.72637e-27	54.4761	MIR3189	up
AF064860.1	-0.436577	0.198531	-11.7839	7.69933e-29	3.76893e-27	54.464	AF064860.1	no
AC064807.1	-0.915191	2.28908	-11.7815	7.87576e-29	3.85212e-27	54.4416	AC064807.1	down
AC021491.4	-0.759934	0.62041	-11.78	7.98911e-29	3.90435e-27	54.4274	AC021491.4	down
AC005796.1	-0.795796	0.272241	-11.7777	8.16801e-29	3.98614e-27	54.4054	AC005796.1	down
FAM3B	-1.65811	1.87722	-11.7777	8.16989e-29	3.98614e-27	54.4052	FAM3B	down
OR10AB1P	-0.266459	0.160292	-11.7775	8.18482e-29	3.99015e-27	54.4034	OR10AB1P	no
AC015971.1	-0.276068	0.215532	-11.7759	8.30909e-29	4.04741e-27	54.3884	AC015971.1	no
AC108472.1	-0.539153	0.29014	-11.7745	8.42278e-29	4.09943e-27	54.375	AC108472.1	down
C5orf49	-1.16745	1.21299	-11.7736	8.49453e-29	4.13097e-27	54.3665	C5orf49	down
ARAP2	-1.18497	3.97571	-11.7717	8.64787e-29	4.2021e-27	54.3488	ARAP2	down
DPP4-DT	1.47161	1.48403	11.7699	8.79702e-29	4.27108e-27	54.3318	DPP4-DT	up
FOXA2	-2.35409	1.99363	-11.7697	8.81697e-29	4.27728e-27	54.3296	FOXA2	down
PDE9A	1.27315	4.22456	11.7665	9.0904e-29	4.40633e-27	54.2993	PDE9A	up
RTCA-AS1	-0.682778	1.29107	-11.7653	9.19958e-29	4.45561e-27	54.2875	RTCA-AS1	down
NFIA-AS1	-0.34727	0.217023	-11.7645	9.2701e-29	4.48611e-27	54.2799	NFIA-AS1	no
AIF1L	-1.76141	6.26222	-11.7629	9.40921e-29	4.54973e-27	54.2651	AIF1L	down
EIPR1-IT1	-1.43544	1.67415	-11.761	9.57719e-29	4.62718e-27	54.2476	EIPR1-IT1	down
HCRTR1	-0.36856	0.374238	-11.7602	9.65669e-29	4.66095e-27	54.2394	HCRTR1	no
RAG2	-2.09971	0.82402	-11.7601	9.66276e-29	4.66095e-27	54.2387	RAG2	down
ROR2	-2.01286	2.55597	-11.7566	9.99491e-29	4.81726e-27	54.2052	ROR2	down
MAP3K8	-1.01532	2.9263	-11.7559	1.00534e-28	4.84151e-27	54.1994	MAP3K8	down
SYT4	-0.340749	0.124706	-11.7545	1.01948e-28	4.90566e-27	54.1856	SYT4	no
AC007613.1	-1.04538	1.39221	-11.7536	1.02756e-28	4.94051e-27	54.1778	AC007613.1	down
ABCC6P1	1.03682	1.26535	11.7479	1.08546e-28	5.2147e-27	54.1234	ABCC6P1	up
PLA2G4E-AS1	-0.270493	0.234467	-11.7466	1.09923e-28	5.27656e-27	54.1109	PLA2G4E-AS1	no
ARHGEF35-AS1	-0.950765	1.54337	-11.7411	1.15859e-28	5.55703e-27	54.0587	ARHGEF35-AS1	down
GPR83	-1.76723	1.94924	-11.7407	1.16292e-28	5.5733e-27	54.055	GPR83	down
GTF2F2P2	-0.189058	0.0474846	-11.7389	1.18254e-28	5.66275e-27	54.0384	GTF2F2P2	no
AC006019.1	-0.0386655	0.0119845	-11.7368	1.20594e-28	5.76649e-27	54.019	AC006019.1	no
LINC00609	-0.98011	0.773024	-11.7368	1.20614e-28	5.76649e-27	54.0188	LINC00609	down
AC002057.1	-0.432979	0.110069	-11.7353	1.22372e-28	5.8458e-27	54.0045	AC002057.1	no
CCND1	1.46775	7.83883	11.7333	1.24678e-28	5.95122e-27	53.986	CCND1	up
ID4	-1.59356	8.18817	-11.7299	1.28805e-28	6.14327e-27	53.9537	ID4	down
DCN	-2.96114	4.07149	-11.7287	1.30351e-28	6.212e-27	53.9418	DCN	down
AC103681.2	-0.576905	0.410441	-11.7255	1.34324e-28	6.3962e-27	53.9121	AC103681.2	down
DNAJB4	-1.30248	5.04602	-11.7254	1.34497e-28	6.39933e-27	53.9108	DNAJB4	down
NTN1	-1.04754	1.07147	-11.7248	1.3519e-28	6.42716e-27	53.9057	NTN1	down
CITED1	2.2289	2.46465	11.7243	1.35941e-28	6.45771e-27	53.9002	CITED1	up
CCDC170	-1.29169	2.87621	-11.7205	1.40953e-28	6.69041e-27	53.8643	CCDC170	down
AL157935.1	-0.726834	0.742411	-11.7175	1.44988e-28	6.87502e-27	53.8363	AL157935.1	down
AP005264.6	-0.191667	0.10598	-11.7174	1.45073e-28	6.87502e-27	53.8357	AP005264.6	no
NAV2-AS4	-0.539264	0.329116	-11.7173	1.45268e-28	6.87875e-27	53.8344	NAV2-AS4	down
AC092745.2	-0.811997	0.757531	-11.7121	1.52575e-28	7.21903e-27	53.7857	AC092745.2	down
AC093278.1	-0.293516	0.15612	-11.711	1.54211e-28	7.29062e-27	53.7751	AC093278.1	no
C2orf50	-0.227074	0.199462	-11.7092	1.56891e-28	7.4114e-27	53.758	C2orf50	no
AC011298.1	-1.57281	0.677753	-11.7052	1.63002e-28	7.69397e-27	53.7201	AC011298.1	down
AC073130.2	-0.757108	0.692437	-11.7002	1.70873e-28	8.05912e-27	53.6734	AC073130.2	down
HMGN2P40	-0.614167	0.466741	-11.6985	1.73652e-28	8.18366e-27	53.6574	HMGN2P40	down
MKLN1-AS	-0.517588	1.30417	-11.6984	1.73794e-28	8.18389e-27	53.6566	MKLN1-AS	down
KIF28P	-0.169191	0.137017	-11.6979	1.74603e-28	8.21547e-27	53.652	KIF28P	no
CHODL	-0.713543	0.81731	-11.6951	1.79317e-28	8.42825e-27	53.6255	CHODL	down
LINC01508	-1.36909	1.85563	-11.6951	1.79409e-28	8.42825e-27	53.625	LINC01508	down
SEMA3F	1.23406	5.86436	11.691	1.86472e-28	8.75315e-27	53.5867	SEMA3F	up
TENT5C	-1.24641	4.74738	-11.6888	1.904e-28	8.93048e-27	53.5661	TENT5C	down
KARS1P2	-0.130351	0.0586521	-11.6874	1.92901e-28	9.04064e-27	53.5531	KARS1P2	no
TMOD1	-1.97894	3.01337	-11.6856	1.96387e-28	9.19678e-27	53.5354	TMOD1	down
IBA57	-0.68857	1.94745	-11.6836	2.00002e-28	9.3587e-27	53.5173	IBA57	down
FBXO17	-0.639686	0.796052	-11.6812	2.04743e-28	9.573e-27	53.494	FBXO17	down
HBA1	-0.982901	0.571882	-11.6811	2.04921e-28	9.57375e-27	53.4932	HBA1	down
AC020663.1	-0.269941	0.12046	-11.6739	2.19397e-28	1.0242e-26	53.4255	AC020663.1	no
FMO1	-0.892607	0.744662	-11.6723	2.22701e-28	1.03881e-26	53.4107	FMO1	down
AC138409.2	-0.341578	0.486263	-11.6693	2.29116e-28	1.0679e-26	53.3825	AC138409.2	no
AC080038.1	1.8446	2.30065	11.6681	2.3174e-28	1.07928e-26	53.3712	AC080038.1	up
DBF4P3	-0.171896	0.0539415	-11.6656	2.37359e-28	1.10458e-26	53.3474	DBF4P3	no
AC007637.1	-1.19611	1.6961	-11.6648	2.39248e-28	1.1125e-26	53.3396	AC007637.1	down
ELN-AS1	-1.21526	2.31575	-11.6641	2.40748e-28	1.1186e-26	53.3334	ELN-AS1	down
NEK5	-0.436154	0.643638	-11.6625	2.44347e-28	1.13444e-26	53.3187	NEK5	no
AC126182.3	-0.163006	0.0805794	-11.6623	2.4499e-28	1.13654e-26	53.3161	AC126182.3	no
LINC01836	-1.30326	1.27517	-11.6607	2.48566e-28	1.15222e-26	53.3017	LINC01836	down
PIH1D2	-0.827938	2.10155	-11.6605	2.49113e-28	1.15386e-26	53.2995	PIH1D2	down
MTARC2	-1.4088	5.04586	-11.6527	2.68166e-28	1.24114e-26	53.2264	MTARC2	down
FOXD3-AS1	-0.140679	0.0444326	-11.6513	2.71838e-28	1.25716e-26	53.2129	FOXD3-AS1	no
RAD17P1	-0.211939	0.0567071	-11.6511	2.72374e-28	1.25866e-26	53.211	RAD17P1	no
LINC01985	-0.518392	0.38583	-11.6468	2.83788e-28	1.31039e-26	53.1703	LINC01985	down
RRH	-0.107635	0.125376	-11.6422	2.96251e-28	1.36687e-26	53.1277	RRH	no
CRYAB	-1.80326	6.63171	-11.64	3.0265e-28	1.39531e-26	53.1065	CRYAB	down
LINC02427	-0.434884	0.350502	-11.6394	3.04216e-28	1.40145e-26	53.1013	LINC02427	no
ECE1	1.31704	7.83076	11.6379	3.08536e-28	1.42025e-26	53.0874	ECE1	up
A2M-AS1	-0.772885	1.06026	-11.6366	3.12427e-28	1.43704e-26	53.0749	A2M-AS1	down
CUX2	-2.1062	0.981947	-11.6303	3.31825e-28	1.52509e-26	53.0152	CUX2	down
GCSAM	-1.25618	1.71002	-11.629	3.35931e-28	1.54276e-26	53.003	GCSAM	down
ABCC3	2.132	4.50345	11.6275	3.40611e-28	1.56305e-26	52.9893	ABCC3	up
GLUL	-1.11954	7.54772	-11.6269	3.42672e-28	1.57129e-26	52.9833	GLUL	down
FOLR3	-1.10991	0.71995	-11.6255	3.47199e-28	1.59082e-26	52.9703	FOLR3	down
LINC01519	-0.268639	0.0957682	-11.6206	3.6357e-28	1.66455e-26	52.9246	LINC01519	no
AC007563.1	-0.621562	0.579939	-11.615	3.83233e-28	1.75322e-26	52.8724	AC007563.1	down
RNVU1-22	-0.649273	0.272248	-11.6131	3.90364e-28	1.78447e-26	52.8541	RNVU1-22	down
ACOT6	-0.172412	0.0971541	-11.6086	4.07422e-28	1.85966e-26	52.8117	ACOT6	no
VANGL1	-1.10236	3.17668	-11.6086	4.07437e-28	1.85966e-26	52.8116	VANGL1	down
RMI2	1.22052	3.18644	11.6065	4.15591e-28	1.89542e-26	52.792	RMI2	up
AC007114.2	-0.301054	0.255211	-11.6046	4.22829e-28	1.92695e-26	52.7749	AC007114.2	no
MTERF4	-0.87266	3.47653	-11.6025	4.31547e-28	1.96517e-26	52.7546	MTERF4	down
DLG4	1.1576	3.50973	11.6006	4.39371e-28	1.99927e-26	52.7368	DLG4	up
SUGT1P3	-0.745306	1.47299	-11.5989	4.46277e-28	2.02914e-26	52.7213	SUGT1P3	down
FLNC	-1.34132	1.2808	-11.5981	4.49997e-28	2.0445e-26	52.7131	FLNC	down
JMJD1C-AS1	-0.723009	1.35692	-11.5956	4.60561e-28	2.09089e-26	52.6901	JMJD1C-AS1	down
CD164L2	1.93828	2.36611	11.5923	4.75171e-28	2.15557e-26	52.6591	CD164L2	up
REN	1.70015	1.6859	11.5907	4.82282e-28	2.18616e-26	52.6444	REN	up
LRRFIP2	-0.722127	3.80853	-11.5888	4.91213e-28	2.22495e-26	52.6262	LRRFIP2	down
POLI	-1.1288	3.46386	-11.5877	4.96363e-28	2.24656e-26	52.6159	POLI	down
TSNAXIP1	-0.789708	0.733859	-11.5862	5.03372e-28	2.27655e-26	52.602	TSNAXIP1	down
AL445309.1	-0.661514	0.630667	-11.5858	5.05179e-28	2.28298e-26	52.5984	AL445309.1	down
AL355607.1	-1.79746	1.88732	-11.585	5.08909e-28	2.2981e-26	52.5911	AL355607.1	down
SPATA4	-0.813934	0.928567	-11.5834	5.16756e-28	2.33176e-26	52.5759	SPATA4	down
AL353151.2	-0.468763	0.417396	-11.5812	5.27934e-28	2.38039e-26	52.5547	AL353151.2	no
DPY19L2P4	-0.707598	0.420373	-11.5797	5.34988e-28	2.41037e-26	52.5416	DPY19L2P4	down
TK1	1.33461	3.99396	11.5796	5.35952e-28	2.41288e-26	52.5398	TK1	up
AC092718.6	-0.64453	0.451847	-11.5783	5.42431e-28	2.4402e-26	52.5279	AC092718.6	down
RPS27AP20	-0.474437	0.304429	-11.5773	5.47747e-28	2.46225e-26	52.5182	RPS27AP20	no
EPS8	1.58946	5.42421	11.5769	5.49555e-28	2.46851e-26	52.5149	EPS8	up
KATNAL2	-1.51212	2.34426	-11.5751	5.58838e-28	2.50831e-26	52.4983	KATNAL2	down
MLLT3	-1.08783	3.70083	-11.5746	5.61751e-28	2.51949e-26	52.4932	MLLT3	down
B3GNT8	1.35446	2.67346	11.5647	6.16784e-28	2.76423e-26	52.4005	B3GNT8	up
SCN11A	-0.165087	0.159031	-11.5639	6.21085e-28	2.7814e-26	52.3936	SCN11A	no
AL354743.1	-0.536522	0.377243	-11.5575	6.59948e-28	2.95322e-26	52.3334	AL354743.1	down
CFAP157	-0.494898	0.778092	-11.5494	7.12216e-28	3.18471e-26	52.2578	CFAP157	no
NPY5R	-0.483599	0.247598	-11.5481	7.21203e-28	3.22248e-26	52.2454	NPY5R	no
AL132765.1	-0.481262	0.273213	-11.5469	7.2935e-28	3.25643e-26	52.2343	AL132765.1	no
AC092803.4	-0.46895	0.456183	-11.5459	7.36398e-28	3.28543e-26	52.2247	AC092803.4	no
AC002064.1	-0.369063	0.21409	-11.5448	7.44065e-28	3.31714e-26	52.2144	AC002064.1	no
GRB7	1.71679	4.77354	11.5411	7.70535e-28	3.43258e-26	52.1798	GRB7	up
EIF2AK3-DT	-0.642715	1.33273	-11.5399	7.7935e-28	3.46924e-26	52.1685	EIF2AK3-DT	down
AP000438.1	-0.369743	0.235849	-11.5359	8.08792e-28	3.59761e-26	52.1317	AP000438.1	no
RPL39P5	-0.658186	0.484864	-11.5325	8.3515e-28	3.71208e-26	52.0999	RPL39P5	down
CRABP1	-3.64798	4.44972	-11.529	8.63395e-28	3.83475e-26	52.067	CRABP1	down
SFMBT1	-0.863608	2.60757	-11.5282	8.69957e-28	3.86101e-26	52.0595	SFMBT1	down
HIF3A	-0.82253	0.802673	-11.5258	8.90257e-28	3.94815e-26	52.0366	HIF3A	down
CCDC87	-0.859248	1.34367	-11.5209	9.32038e-28	4.13037e-26	51.9911	CCDC87	down
CASZ1	-0.801213	1.17182	-11.5135	9.98737e-28	4.42265e-26	51.9226	CASZ1	down
AL157823.2	-0.517888	0.324781	-11.509	1.04202e-27	4.61087e-26	51.8805	AL157823.2	down
C1orf194	-0.745256	0.429626	-11.504	1.09295e-27	4.83265e-26	51.8332	C1orf194	down
RNU11	-0.252768	0.0446719	-11.5023	1.11038e-27	4.90607e-26	51.8175	RNU11	no
GOLGA2P4	-0.316548	0.129124	-11.5017	1.11661e-27	4.92994e-26	51.812	GOLGA2P4	no
SRPX	-1.79293	3.45133	-11.5007	1.12666e-27	4.97062e-26	51.8031	SRPX	down
LINC01301	-0.205029	0.278732	-11.4988	1.14759e-27	5.05917e-26	51.7848	LINC01301	no
RPS27L	0.638294	5.30695	11.4956	1.18268e-27	5.21003e-26	51.755	RPS27L	up
ARMC2	-0.637643	1.7161	-11.4928	1.2141e-27	5.34447e-26	51.729	ARMC2	down
STRA6	2.61499	2.7279	11.4878	1.27243e-27	5.59708e-26	51.6824	STRA6	up
MAPK8IP2	-0.703967	1.0098	-11.4848	1.30925e-27	5.7548e-26	51.6542	MAPK8IP2	down
SPATA9	0.63417	1.0375	11.4841	1.31674e-27	5.78346e-26	51.6485	SPATA9	up
OIT3	1.54483	1.76406	11.4826	1.33643e-27	5.86561e-26	51.6338	OIT3	up
AP000224.1	-0.192863	0.143316	-11.4769	1.40948e-27	6.18162e-26	51.581	AP000224.1	no
TMEM139-AS1	-0.122773	0.0696527	-11.4721	1.47517e-27	6.46414e-26	51.5359	TMEM139-AS1	no
AC093772.2	-0.114079	0.0415772	-11.472	1.47607e-27	6.46414e-26	51.5352	AC093772.2	no
AC008738.2	-0.98013	0.753845	-11.4709	1.49136e-27	6.52631e-26	51.525	AC008738.2	down
SLIT1	3.24203	3.40888	11.4677	1.53705e-27	6.72127e-26	51.4951	SLIT1	up
AC104985.3	-0.102229	0.021572	-11.4663	1.55703e-27	6.80363e-26	51.4823	AC104985.3	no
LINC00205	-1.12789	2.9729	-11.464	1.59057e-27	6.94511e-26	51.4612	LINC00205	down
AC107959.1	-0.376423	0.588608	-11.4608	1.6392e-27	7.1522e-26	51.4313	AC107959.1	no
TMEM44-AS1	-1.04932	3.50096	-11.4557	1.72075e-27	7.50249e-26	51.3832	TMEM44-AS1	down
FBXO27	-0.927969	1.70387	-11.4553	1.72635e-27	7.52139e-26	51.38	FBXO27	down
KIF6	-0.608202	0.588524	-11.449	1.83204e-27	7.97602e-26	51.321	KIF6	down
NBEAP1	-0.24458	0.187102	-11.4474	1.85893e-27	8.08717e-26	51.3066	NBEAP1	no
RTN1	-1.0991	1.791	-11.4459	1.88529e-27	8.19584e-26	51.2926	RTN1	down
AL359541.1	-0.63463	0.798336	-11.445	1.9024e-27	8.26418e-26	51.2837	AL359541.1	down
FAM178B	1.43156	1.4161	11.4429	1.93865e-27	8.41552e-26	51.265	FAM178B	up
AK7	-0.943841	1.33355	-11.4421	1.95374e-27	8.4748e-26	51.2573	AK7	down
MEIS1	-0.605074	0.806872	-11.4416	1.96279e-27	8.50784e-26	51.2527	MEIS1	down
PELI2	-0.966573	2.1839	-11.4399	1.99503e-27	8.64128e-26	51.2365	PELI2	down
RBPMS-AS1	-1.05796	3.03786	-11.4397	1.99938e-27	8.65384e-26	51.2344	RBPMS-AS1	down
ZNF826P	-1.5418	2.50264	-11.437	2.04893e-27	8.86183e-26	51.2101	ZNF826P	down
ZDHHC14	-0.788684	1.67545	-11.4351	2.08621e-27	9.01654e-26	51.1922	ZDHHC14	down
LINC01722	-0.056775	0.0191864	-11.4312	2.16398e-27	9.34585e-26	51.1559	LINC01722	no
ZRANB2-AS2	-0.344076	0.443724	-11.4286	2.21676e-27	9.56683e-26	51.1321	ZRANB2-AS2	no
NFATC1	-1.04591	2.2787	-11.4252	2.2902e-27	9.87663e-26	51.0997	NFATC1	down
CELF4	1.22885	1.4817	11.423	2.33609e-27	1.00672e-25	51.0801	CELF4	up
LINC01531	-0.0551691	0.0248564	-11.4218	2.36436e-27	1.01816e-25	51.0681	LINC01531	no
MIOX	-2.26561	2.95887	-11.4201	2.40162e-27	1.03346e-25	51.0526	MIOX	down
AAK1	-1.12819	3.57691	-11.4162	2.48996e-27	1.0707e-25	51.0168	AAK1	down
HS6ST3	-1.54633	1.22491	-11.4159	2.4985e-27	1.0736e-25	51.0134	HS6ST3	down
AL161457.1	-0.168065	0.0700256	-11.4155	2.50737e-27	1.07663e-25	51.0099	AL161457.1	no
AL121672.2	-0.895783	1.76245	-11.4148	2.52247e-27	1.08233e-25	51.004	AL121672.2	down
AC007349.4	-0.390086	0.198847	-11.414	2.54202e-27	1.08993e-25	50.9963	AC007349.4	no
PARM1-AS1	-0.207421	0.134049	-11.4134	2.55767e-27	1.09585e-25	50.9902	PARM1-AS1	no
FHL1	-2.52894	6.4007	-11.4114	2.60606e-27	1.11578e-25	50.9717	FHL1	down
TPH2	-0.0283383	0.0106934	-11.4099	2.64115e-27	1.12999e-25	50.9584	TPH2	no
SMIM10	-1.16717	3.30299	-11.4098	2.64524e-27	1.13092e-25	50.9569	SMIM10	down
GNG7	-0.748269	3.72038	-11.4096	2.6485e-27	1.1315e-25	50.9556	GNG7	down
LINC01586	-1.52771	1.19296	-11.4091	2.66087e-27	1.13597e-25	50.951	LINC01586	down
TOB1	-1.51093	6.27025	-11.4088	2.66985e-27	1.13899e-25	50.9477	TOB1	down
AC020978.9	-0.621773	0.572832	-11.4087	2.6721e-27	1.13913e-25	50.9468	AC020978.9	down
FHL2	-1.47581	3.23245	-11.4044	2.78048e-27	1.18448e-25	50.9074	FHL2	down
AGR2	2.87332	5.15019	11.404	2.79233e-27	1.18868e-25	50.9032	AGR2	up
AC005082.1	-1.57853	1.55954	-11.4015	2.85815e-27	1.21583e-25	50.8801	AC005082.1	down
PLEKHD1	-1.33553	0.893398	-11.4009	2.87287e-27	1.22122e-25	50.875	PLEKHD1	down
AL035425.4	-0.827617	0.343505	-11.3988	2.93172e-27	1.24534e-25	50.8549	AL035425.4	down
AL031123.4	-0.233546	0.0606911	-11.3983	2.94548e-27	1.25029e-25	50.8503	AL031123.4	no
MTMR11	1.46803	3.04644	11.398	2.95379e-27	1.25292e-25	50.8475	MTMR11	up
AKR1C2	-1.38788	0.890674	-11.3964	2.99869e-27	1.27106e-25	50.8325	AKR1C2	down
AL354696.2	-0.48748	0.947136	-11.3959	3.01219e-27	1.27588e-25	50.8281	AL354696.2	no
FERMT1	-1.54205	1.74762	-11.3911	3.14998e-27	1.33329e-25	50.7837	FERMT1	down
TUB	-1.40732	3.27881	-11.3859	3.30648e-27	1.39854e-25	50.7357	TUB	down
ULK4P3	-0.427171	0.263066	-11.385	3.33572e-27	1.4099e-25	50.7269	ULK4P3	no
ASF1B	1.34085	3.44797	11.38	3.49528e-27	1.47629e-25	50.6806	ASF1B	up
FBXO30-DT	-0.728211	1.83693	-11.3739	3.69944e-27	1.56141e-25	50.6243	FBXO30-DT	down
NSMCE3	-0.821497	4.29894	-11.3736	3.70951e-27	1.56455e-25	50.6216	NSMCE3	down
AL033519.5	-0.519338	0.474557	-11.3734	3.71599e-27	1.56617e-25	50.6199	AL033519.5	down
AL512604.2	-0.191173	0.137042	-11.3719	3.76818e-27	1.58704e-25	50.6061	AL512604.2	no
ARHGAP23	1.39023	4.34165	11.3692	3.86619e-27	1.62717e-25	50.5806	ARHGAP23	up
AC002451.1	-0.617839	0.675117	-11.3684	3.89326e-27	1.63729e-25	50.5737	AC002451.1	down
AC108159.1	-0.38875	0.185982	-11.3684	3.89574e-27	1.63729e-25	50.5731	AC108159.1	no
CDC14B	-1.13481	3.4157	-11.3682	3.90251e-27	1.63897e-25	50.5714	CDC14B	down
CEP85L	-0.70964	1.4892	-11.367	3.94465e-27	1.6555e-25	50.5607	CEP85L	down
OR2A42	-0.353045	0.304211	-11.3667	3.95617e-27	1.65916e-25	50.5578	OR2A42	no
AC079921.1	-0.297306	0.423497	-11.366	3.98435e-27	1.6698e-25	50.5508	AC079921.1	no
TMEM267	-1.03397	4.4886	-11.3628	4.10298e-27	1.71831e-25	50.5217	TMEM267	down
LAMB3	3.40212	5.67321	11.3612	4.16386e-27	1.74258e-25	50.5071	LAMB3	up
BCL11A	-0.61019	0.784134	-11.3578	4.29991e-27	1.79825e-25	50.4752	BCL11A	down
TC2N	-1.29443	3.47974	-11.3519	4.54183e-27	1.89808e-25	50.421	TC2N	down
AC122707.1	-0.341585	0.105502	-11.3487	4.68085e-27	1.95481e-25	50.3911	AC122707.1	no
ROPN1B	-0.566619	0.499546	-11.3479	4.71529e-27	1.9678e-25	50.3838	ROPN1B	down
AC104938.1	-0.459635	0.612035	-11.3435	4.91227e-27	2.04857e-25	50.3432	AC104938.1	no
C11orf65	-0.477288	0.924999	-11.3366	5.23881e-27	2.18322e-25	50.2794	C11orf65	no
WWTR1-AS1	-0.787083	1.11696	-11.3321	5.46499e-27	2.27588e-25	50.2375	WWTR1-AS1	down
PRPS1	-1.04305	5.28308	-11.3311	5.51534e-27	2.29524e-25	50.2284	PRPS1	down
ITPR1-DT	-1.45982	1.42293	-11.328	5.67466e-27	2.35989e-25	50.2002	ITPR1-DT	down
MAB21L1	-0.428537	0.359767	-11.3269	5.73789e-27	2.38302e-25	50.1892	MAB21L1	no
C12orf60	-0.53885	0.96404	-11.3268	5.74092e-27	2.38302e-25	50.1887	C12orf60	down
AC016026.2	-0.541174	0.410964	-11.3268	5.74232e-27	2.38302e-25	50.1885	AC016026.2	down
UCKL1-AS1	-0.401542	0.386159	-11.3263	5.7697e-27	2.39271e-25	50.1837	UCKL1-AS1	no
PFKFB2	-1.53544	4.62949	-11.326	5.78254e-27	2.39637e-25	50.1815	PFKFB2	down
AL442067.3	-0.360325	0.486616	-11.3243	5.87457e-27	2.43281e-25	50.1659	AL442067.3	no
SEZ6L2	2.54975	3.94986	11.3237	5.9119e-27	2.44656e-25	50.1596	SEZ6L2	up
AC011199.1	-0.0712793	0.0309143	-11.322	6.00083e-27	2.48164e-25	50.1448	AC011199.1	no
LOH12CR2	-1.07935	2.25224	-11.321	6.06006e-27	2.50439e-25	50.1351	LOH12CR2	down
AP003174.1	0.819257	0.993698	11.3169	6.29711e-27	2.60055e-25	50.097	AP003174.1	up
MVP	1.24673	6.84204	11.3168	6.30319e-27	2.60125e-25	50.0961	MVP	up
AC012038.2	1.98731	2.01898	11.3131	6.52129e-27	2.68939e-25	50.0624	AC012038.2	up
PEX5L	-0.18061	0.142188	-11.3115	6.62233e-27	2.72916e-25	50.0471	PEX5L	no
LEMD1	2.00357	3.49987	11.3035	7.13372e-27	2.93788e-25	49.9734	LEMD1	up
GABRA2	-0.0510438	0.0180517	-11.3017	7.25233e-27	2.98465e-25	49.957	GABRA2	no
NCRNA00250	-0.323938	0.165429	-11.2988	7.45213e-27	3.06476e-25	49.9301	NCRNA00250	no
HBA2	-2.30933	4.71666	-11.2964	7.61983e-27	3.13156e-25	49.908	HBA2	down
AP001267.3	-0.60325	0.932298	-11.2945	7.75239e-27	3.18384e-25	49.8909	AP001267.3	down
MEI4	-1.24806	1.25993	-11.2925	7.89754e-27	3.24121e-25	49.8725	MEI4	down
SUCNR1	-1.58498	2.40164	-11.2917	7.95691e-27	3.26332e-25	49.8651	SUCNR1	down
PROX1-AS1	-0.649191	0.388904	-11.2914	7.97865e-27	3.26998e-25	49.8624	PROX1-AS1	down
MBNL1-AS1	-0.420393	0.630766	-11.2882	8.22301e-27	3.36781e-25	49.8325	MBNL1-AS1	no
SERPINA1	3.66169	8.81367	11.2867	8.33846e-27	3.41274e-25	49.8187	SERPINA1	up
GPRIN1	0.967243	1.34656	11.2857	8.41247e-27	3.44066e-25	49.8099	GPRIN1	up
LIMK1	0.873923	5.1221	11.2828	8.64743e-27	3.53433e-25	49.7826	LIMK1	up
AF131216.3	-2.45238	2.16722	-11.2816	8.74199e-27	3.57052e-25	49.7718	AF131216.3	down
AL049839.2	-0.0745164	0.022431	-11.2808	8.80491e-27	3.59375e-25	49.7647	AL049839.2	no
NEXN	-1.42554	2.46817	-11.2798	8.89407e-27	3.62765e-25	49.7548	NEXN	down
SETBP1	-1.05686	2.29278	-11.2794	8.92601e-27	3.63817e-25	49.7512	SETBP1	down
CFAP298-TCP10L	-0.0768975	0.0927684	-11.2751	9.29099e-27	3.78434e-25	49.7115	CFAP298-TCP10L	no
ELP4	-0.334867	1.01175	-11.2739	9.39132e-27	3.82259e-25	49.7008	ELP4	no
AC018816.1	1.04041	1.53059	11.2727	9.49362e-27	3.86158e-25	49.6901	AC018816.1	up
AC139019.1	-0.486288	0.779472	-11.2705	9.69213e-27	3.93963e-25	49.6696	AC139019.1	no
ZNF480	-0.77863	3.27172	-11.2675	9.96781e-27	4.04892e-25	49.6418	ZNF480	down
CCDC152	-0.743309	0.788949	-11.2632	1.03685e-26	4.20881e-25	49.6027	CCDC152	down
LINC01220	-0.834061	1.21333	-11.2609	1.05985e-26	4.29923e-25	49.581	LINC01220	down
AL590822.1	-0.366188	0.183031	-11.2604	1.06447e-26	4.31445e-25	49.5767	AL590822.1	no
TBL1X	-0.900441	3.88894	-11.2604	1.06505e-26	4.31445e-25	49.5761	TBL1X	down
AC083862.2	-0.847203	2.11952	-11.2594	1.07449e-26	4.34972e-25	49.5674	AC083862.2	down
PRKCE	-0.91832	1.91948	-11.2583	1.08553e-26	4.39143e-25	49.5572	PRKCE	down
LRFN5	-0.607343	0.299467	-11.2578	1.0906e-26	4.4089e-25	49.5526	LRFN5	down
ZNF66	-0.494093	0.908964	-11.2566	1.10315e-26	4.45661e-25	49.5413	ZNF66	no
AC112484.1	-0.614253	0.599783	-11.2564	1.10498e-26	4.46097e-25	49.5396	AC112484.1	down
FOLH1	1.129	1.49797	11.253	1.14028e-26	4.60037e-25	49.5085	FOLH1	up
FAXDC2	-1.45156	4.31472	-11.2523	1.14824e-26	4.62935e-25	49.5016	FAXDC2	down
AC010501.2	-0.79092	0.957899	-11.2507	1.16545e-26	4.69552e-25	49.4868	AC010501.2	down
FBXO30	-1.07611	3.19764	-11.2485	1.18882e-26	4.78644e-25	49.4671	FBXO30	down
AC118658.1	-0.790804	0.608773	-11.247	1.2056e-26	4.85072e-25	49.4532	AC118658.1	down
ZNF536	-1.04851	0.55322	-11.2417	1.26652e-26	5.09237e-25	49.4044	ZNF536	down
FRMPD1	-0.319537	0.227034	-11.239	1.2988e-26	5.21866e-25	49.3794	FRMPD1	no
AC006970.1	-1.10945	0.715865	-11.236	1.33562e-26	5.36296e-25	49.3517	AC006970.1	down
COL4A6	-0.759955	0.532122	-11.2345	1.35365e-26	5.4317e-25	49.3384	COL4A6	down
AC007695.1	-0.219408	0.152106	-11.2312	1.39601e-26	5.59789e-25	49.3079	AC007695.1	no
NTS	-1.1663	0.666897	-11.2275	1.44504e-26	5.79058e-25	49.2737	NTS	down
SLC26A4	-3.19885	6.05982	-11.2273	1.44668e-26	5.79324e-25	49.2726	SLC26A4	down
MAN1A1	-1.34274	4.22981	-11.2262	1.4627e-26	5.85345e-25	49.2616	MAN1A1	down
LINC01277	-0.296673	0.3535	-11.2253	1.47414e-26	5.89526e-25	49.2539	LINC01277	no
ZNF37CP	-0.896567	0.686299	-11.2252	1.47533e-26	5.89604e-25	49.2531	ZNF37CP	down
PAQR4	0.922232	2.17178	11.2248	1.48117e-26	5.91541e-25	49.2492	PAQR4	up
AC232271.3	-0.160931	0.160383	-11.2235	1.49869e-26	5.98138e-25	49.2375	AC232271.3	no
ANO4	-0.40999	0.222692	-11.2221	1.51896e-26	6.05822e-25	49.2242	ANO4	no
HK1	-0.948301	6.36706	-11.2211	1.53223e-26	6.10702e-25	49.2156	HK1	down
PNPLA1	-0.177261	0.108321	-11.2202	1.54611e-26	6.15823e-25	49.2067	PNPLA1	no
LINC01875	-0.242211	0.0570984	-11.217	1.59161e-26	6.33519e-25	49.1779	LINC01875	no
AL353133.1	-0.292983	0.0801664	-11.2165	1.59927e-26	6.36144e-25	49.1732	AL353133.1	no
AC007786.1	-0.444005	0.585345	-11.2163	1.60313e-26	6.37254e-25	49.1708	AC007786.1	no
AC073140.1	-0.605679	0.198093	-11.2115	1.676e-26	6.65772e-25	49.1267	AC073140.1	down
AJ011932.1	-1.52316	1.11937	-11.2101	1.69657e-26	6.73495e-25	49.1146	AJ011932.1	down
ALMS1P1	-0.378187	0.464211	-11.2064	1.75685e-26	6.96957e-25	49.08	ALMS1P1	no
CNTNAP3	-0.417973	0.279362	-11.2047	1.78471e-26	7.07538e-25	49.0644	CNTNAP3	no
CTSLP3	-0.621129	0.668175	-11.2013	1.84104e-26	7.29382e-25	49.0336	CTSLP3	down
CCDC13	-0.204749	0.244822	-11.2005	1.85484e-26	7.34362e-25	49.0262	CCDC13	no
AC130466.1	-0.0944587	0.0532764	-11.2003	1.85756e-26	7.34949e-25	49.0248	AC130466.1	no
SUDS3P1	-0.827174	1.16431	-11.198	1.8976e-26	7.5029e-25	49.0036	SUDS3P1	down
AL162595.1	-0.813307	2.22606	-11.196	1.93405e-26	7.64195e-25	48.9848	AL162595.1	down
GLRB	1.2621	2.49479	11.195	1.95124e-26	7.70475e-25	48.976	GLRB	up
CSF2	1.96342	1.91465	11.1942	1.96538e-26	7.7554e-25	48.9688	CSF2	up
SNX29P1	-0.295478	0.155095	-11.1861	2.12002e-26	8.36009e-25	48.8938	SNX29P1	no
ZNF330	-0.80408	5.68161	-11.1821	2.19907e-26	8.66607e-25	48.8575	ZNF330	down
AC011523.1	-0.55219	0.211037	-11.1805	2.2311e-26	8.78646e-25	48.8432	AC011523.1	down
AL049648.1	-0.314519	0.122381	-11.18	2.242e-26	8.82352e-25	48.8383	AL049648.1	no
MROH6	1.63406	2.93314	11.1782	2.2803e-26	8.96834e-25	48.8215	MROH6	up
FGFBP3	-0.875722	2.27685	-11.1751	2.34643e-26	9.22229e-25	48.7932	FGFBP3	down
AL121935.1	-0.215693	0.0924149	-11.1719	2.41552e-26	9.48757e-25	48.7644	AL121935.1	no
MAGOH2P	-1.14816	1.7234	-11.1709	2.43979e-26	9.57252e-25	48.7545	MAGOH2P	down
AC020658.7	-0.350392	0.205397	-11.1708	2.44037e-26	9.57252e-25	48.7543	AC020658.7	no
FAHD2B	-0.662382	1.1586	-11.1681	2.50207e-26	9.80807e-25	48.7296	FAHD2B	down
AC025419.1	1.13197	1.07401	11.1674	2.51821e-26	9.86486e-25	48.7232	AC025419.1	up
HIPK1-AS1	-0.267203	0.302307	-11.1642	2.5939e-26	1.01547e-24	48.6938	HIPK1-AS1	no
MFGE8	1.77625	6.60289	11.1637	2.60684e-26	1.01986e-24	48.6889	MFGE8	up
TMEM41A	0.728278	3.79332	11.1629	2.62573e-26	1.02657e-24	48.6817	TMEM41A	up
SELENOV	-2.21273	1.74039	-11.1616	2.65872e-26	1.03879e-24	48.6694	SELENOV	down
HYMAI	-0.0947048	0.058059	-11.1614	2.66352e-26	1.03998e-24	48.6676	HYMAI	no
AC114550.1	-0.238307	0.126631	-11.1591	2.71906e-26	1.06097e-24	48.6471	AC114550.1	no
LINC01213	-0.442005	0.269395	-11.1573	2.76521e-26	1.07827e-24	48.6304	LINC01213	no
CRACDL	0.807189	4.10426	11.1563	2.79035e-26	1.08736e-24	48.6215	CRACDL	up
PCSK6	-0.321569	0.256958	-11.1559	2.8021e-26	1.09122e-24	48.6173	PCSK6	no
AC078843.1	-0.366066	0.0928267	-11.1519	2.90696e-26	1.13132e-24	48.5809	AC078843.1	no
AC093424.1	-0.556417	0.364336	-11.1504	2.94821e-26	1.14662e-24	48.5669	AC093424.1	down
ANKRD35	-0.65705	0.796215	-11.1495	2.97149e-26	1.15492e-24	48.5591	ANKRD35	down
AL512363.1	-0.838896	0.671869	-11.1442	3.12062e-26	1.21208e-24	48.5106	AL512363.1	down
RNY3P8	-1.48547	1.12674	-11.1436	3.13718e-26	1.21772e-24	48.5054	RNY3P8	down
POLR2J4	-0.693948	1.95708	-11.143	3.15427e-26	1.22355e-24	48.5	POLR2J4	down
KIAA1614	-0.883799	1.86064	-11.1426	3.16717e-26	1.22776e-24	48.4959	KIAA1614	down
AL035425.3	-1.48905	0.974495	-11.1422	3.17968e-26	1.23146e-24	48.492	AL035425.3	down
AL445437.1	-0.532164	0.495962	-11.1421	3.18086e-26	1.23146e-24	48.4917	AL445437.1	down
TCEAL7	-1.20106	2.21623	-11.1401	3.23942e-26	1.25331e-24	48.4736	TCEAL7	down
AC131888.1	-0.0862807	0.0432933	-11.1396	3.25509e-26	1.25856e-24	48.4688	AC131888.1	no
TAC1	-0.761304	0.321954	-11.1386	3.28642e-26	1.26985e-24	48.4593	TAC1	down
CAB39L	-0.971765	3.44586	-11.1365	3.34964e-26	1.29343e-24	48.4404	CAB39L	down
FER1L5	-0.255524	0.192759	-11.1336	3.44122e-26	1.32793e-24	48.4137	FER1L5	no
S100A16	0.955435	7.56843	11.1297	3.56725e-26	1.37567e-24	48.378	S100A16	up
AP000593.1	-0.172194	0.0904175	-11.1288	3.5967e-26	1.38613e-24	48.3699	AP000593.1	no
UGDH-AS1	-0.842447	1.91003	-11.1259	3.69388e-26	1.42266e-24	48.3435	UGDH-AS1	down
AP002414.2	-0.583517	0.538472	-11.1256	3.70507e-26	1.42604e-24	48.3405	AP002414.2	down
ANKDD1A	-0.884878	2.35053	-11.1253	3.71605e-26	1.42934e-24	48.3375	ANKDD1A	down
LINC01058	-0.632118	0.646667	-11.1242	3.7511e-26	1.44189e-24	48.3282	LINC01058	down
KLK10	3.48088	3.77013	11.1217	3.8399e-26	1.47507e-24	48.305	KLK10	up
AC110792.2	-0.111922	0.043964	-11.1215	3.84743e-26	1.47701e-24	48.3031	AC110792.2	no
OGDHL	-2.25989	3.70816	-11.1143	4.11051e-26	1.57699e-24	48.2376	OGDHL	down
AL591848.3	-0.477611	0.837095	-11.1128	4.16954e-26	1.5986e-24	48.2234	AL591848.3	no
TMEM170B	-0.824227	2.00473	-11.1118	4.20823e-26	1.6124e-24	48.2143	TMEM170B	down
AL157400.2	-0.232115	0.175821	-11.1103	4.26541e-26	1.63325e-24	48.2009	AL157400.2	no
AC010980.1	-1.10866	0.663466	-11.1099	4.28177e-26	1.63846e-24	48.1971	AC010980.1	down
FLRT1	-1.98257	1.46184	-11.1078	4.36291e-26	1.66843e-24	48.1785	FLRT1	down
AC040160.1	0.903928	1.45415	11.107	4.39569e-26	1.67989e-24	48.1711	AC040160.1	up
KCNIP1	-0.609133	0.285964	-11.1032	4.55204e-26	1.73852e-24	48.1364	KCNIP1	down
PI4K2B	-0.963897	4.73204	-11.1015	4.62659e-26	1.76586e-24	48.1203	PI4K2B	down
SDC4	1.99182	9.68151	11.1006	4.66432e-26	1.77912e-24	48.1123	SDC4	up
SLC9C1	-0.697376	0.648556	-11.0996	4.70767e-26	1.7945e-24	48.1031	SLC9C1	down
AC078923.1	-0.312364	0.148846	-11.0965	4.84143e-26	1.8443e-24	48.0754	AC078923.1	no
LOXL2	1.26908	3.18017	11.0955	4.88622e-26	1.86017e-24	48.0662	LOXL2	up
PRIMA1	-1.23601	0.85534	-11.0931	4.99838e-26	1.90166e-24	48.0437	PRIMA1	down
HMCN2	-0.956105	0.782994	-11.0923	5.03462e-26	1.91422e-24	48.0366	HMCN2	down
AC243964.3	-0.756493	0.585913	-11.0901	5.13611e-26	1.95156e-24	48.0168	AC243964.3	down
C8orf48	-1.00403	2.6701	-11.0858	5.34175e-26	2.0284e-24	47.9779	C8orf48	down
XKRX	2.1454	2.68869	11.0838	5.44008e-26	2.06441e-24	47.9598	XKRX	up
AC006058.4	-1.94548	2.80852	-11.0838	5.44405e-26	2.06461e-24	47.9591	AC006058.4	down
KCTD9P4	-0.436505	0.253807	-11.0832	5.4734e-26	2.07441e-24	47.9538	KCTD9P4	no
MLLT1	-0.933139	6.01464	-11.083	5.48284e-26	2.07666e-24	47.9521	MLLT1	down
CAMK2N1	2.64287	6.72298	11.0812	5.57544e-26	2.11039e-24	47.9355	CAMK2N1	up
CX3CL1	1.12959	5.76232	11.0798	5.64606e-26	2.13576e-24	47.923	CX3CL1	up
AC022217.2	-0.439875	0.230525	-11.0791	5.68174e-26	2.14789e-24	47.9168	AC022217.2	no
TPO	-4.40191	6.88782	-11.0755	5.87179e-26	2.21833e-24	47.8842	TPO	down
EFHB	-0.771969	0.89013	-11.0723	6.04939e-26	2.28397e-24	47.8546	EFHB	down
MRC2	2.42499	5.9196	11.0702	6.16916e-26	2.32771e-24	47.8352	MRC2	up
CDH24	0.962414	3.3647	11.0701	6.17364e-26	2.32793e-24	47.8345	CDH24	up
AC092658.1	-0.441888	0.306381	-11.0681	6.28763e-26	2.3694e-24	47.8163	AC092658.1	no
AMBP	-0.789359	0.429952	-11.0668	6.35984e-26	2.3951e-24	47.805	AMBP	down
ANKRD18A	-0.81086	1.10568	-11.0663	6.39031e-26	2.40505e-24	47.8003	ANKRD18A	down
TDRD9	-2.13108	2.31946	-11.0649	6.47716e-26	2.43619e-24	47.7869	TDRD9	down
IRS1	-1.74712	4.53373	-11.0607	6.73135e-26	2.5302e-24	47.7488	IRS1	down
MRPS31	-0.662084	5.01242	-11.0588	6.84527e-26	2.57139e-24	47.7321	MRPS31	down
Z95331.1	-0.0838594	0.0899475	-11.0571	6.957e-26	2.61171e-24	47.7161	Z95331.1	no
AKAP3	-1.01739	1.40218	-11.0533	7.20248e-26	2.70216e-24	47.6817	AKAP3	down
AC084880.1	-1.31673	1.62405	-11.0529	7.22956e-26	2.7106e-24	47.678	AC084880.1	down
IL33	-1.45209	3.0794	-11.0503	7.4043e-26	2.77437e-24	47.6543	IL33	down
AMD1	-0.822568	4.75201	-11.0494	7.46675e-26	2.79601e-24	47.646	AMD1	down
CD63	0.750552	10.499	11.0484	7.53177e-26	2.81858e-24	47.6374	CD63	up
AC254633.1	3.15678	5.16512	11.0474	7.60338e-26	2.84359e-24	47.6281	AC254633.1	up
RAG1	-1.10555	0.93288	-11.0416	8.01957e-26	2.99735e-24	47.5752	RAG1	down
SYT12	3.34621	3.26596	11.0385	8.25018e-26	3.08161e-24	47.5471	SYT12	up
AL591378.1	-0.126507	0.0477819	-11.0362	8.42218e-26	3.14387e-24	47.5267	AL591378.1	no
CTSA	0.712797	5.06989	11.0358	8.4565e-26	3.1547e-24	47.5227	CTSA	up
ARMC4P1	-0.964361	0.724353	-11.0303	8.8921e-26	3.31512e-24	47.4729	ARMC4P1	down
AL121981.1	-0.450315	0.28661	-11.0294	8.96927e-26	3.3418e-24	47.4643	AL121981.1	no
PYY	-1.0754	1.15653	-11.0283	9.05386e-26	3.3712e-24	47.455	PYY	down
PRDM16-DT	-1.63914	2.40484	-11.0233	9.48486e-26	3.52947e-24	47.409	PRDM16-DT	down
CFAP45	-0.764006	0.873748	-11.0231	9.49878e-26	3.53145e-24	47.4075	CFAP45	down
ADIG	-1.65227	1.22223	-11.0231	9.50206e-26	3.53145e-24	47.4072	ADIG	down
HMGA2-AS1	1.53902	2.16386	11.0229	9.5189e-26	3.5355e-24	47.4054	HMGA2-AS1	up
AP002518.2	-0.466239	0.177445	-11.0219	9.60056e-26	3.5636e-24	47.3969	AP002518.2	no
RRS1-AS1	-0.108513	0.108172	-11.0218	9.61311e-26	3.56603e-24	47.3956	RRS1-AS1	no
CACNA2D1	-1.12944	3.7316	-11.0217	9.62376e-26	3.56775e-24	47.3945	CACNA2D1	down
PCDH11X	-0.357246	0.100007	-11.0211	9.67761e-26	3.58548e-24	47.389	PCDH11X	no
KLRG1	-0.762589	1.20966	-11.0177	9.98246e-26	3.69612e-24	47.3583	KLRG1	down
LINC01770	1.67788	2.44712	11.0165	1.00955e-25	3.73564e-24	47.3471	LINC01770	up
ERVW-1	-0.174143	0.122706	-11.0106	1.06476e-25	3.93749e-24	47.2944	ERVW-1	no
RNU6-1160P	-0.904755	0.458266	-11.0089	1.08142e-25	3.99661e-24	47.279	RNU6-1160P	down
MET	2.06163	7.1868	11.0054	1.11664e-25	4.12423e-24	47.2472	MET	up
AC068647.2	-0.614112	0.236461	-11.0047	1.1248e-25	4.15177e-24	47.24	AC068647.2	down
AF067845.4	-0.426498	0.174091	-11.0028	1.14414e-25	4.22055e-24	47.2231	AF067845.4	no
AC008808.2	-0.187296	0.0461706	-10.9999	1.17494e-25	4.33147e-24	47.1968	AC008808.2	no
DIO2	-2.13775	6.3929	-10.9964	1.21309e-25	4.46934e-24	47.1651	DIO2	down
CTSH	1.96516	6.0141	10.9957	1.22088e-25	4.49525e-24	47.1588	CTSH	up
AP000446.1	-0.326527	0.315566	-10.9943	1.23608e-25	4.54841e-24	47.1465	AP000446.1	no
PTCH2	-0.91908	1.36981	-10.9881	1.30805e-25	4.81024e-24	47.0905	PTCH2	down
LINC00652	-0.456892	0.349413	-10.9875	1.31592e-25	4.83618e-24	47.0845	LINC00652	no
SLC29A4	-1.80165	2.27619	-10.9863	1.33033e-25	4.88611e-24	47.0737	SLC29A4	down
CKS1BP1	-1.48752	1.53594	-10.9821	1.38235e-25	5.07406e-24	47.0357	CKS1BP1	down
RTL4	2.66395	2.71978	10.9818	1.386e-25	5.0843e-24	47.0331	RTL4	up
BAIAP3	2.07604	2.92754	10.9813	1.39236e-25	5.1045e-24	47.0286	BAIAP3	up
PPP1R1B	2.25378	2.39242	10.9776	1.44023e-25	5.27674e-24	46.9951	PPP1R1B	up
LINC01534	-0.566331	1.21031	-10.9758	1.4645e-25	5.36233e-24	46.9785	LINC01534	down
AC093607.1	-0.263614	0.100849	-10.9751	1.47429e-25	5.39486e-24	46.9719	AC093607.1	no
AC018865.2	-0.190543	0.0891891	-10.9712	1.52753e-25	5.58624e-24	46.9368	AC018865.2	no
TRPM5	-0.699975	0.538494	-10.9703	1.54047e-25	5.6301e-24	46.9284	TRPM5	down
TXNL1	-0.926319	5.66137	-10.9695	1.55078e-25	5.6643e-24	46.9218	TXNL1	down
AC092807.2	-1.20618	1.61713	-10.9692	1.55498e-25	5.67614e-24	46.9191	AC092807.2	down
HYKK	-0.615302	1.48339	-10.9684	1.56726e-25	5.71748e-24	46.9113	HYKK	down
AC005479.2	1.57045	3.14981	10.9683	1.56846e-25	5.71835e-24	46.9106	AC005479.2	up
ABCG5	-0.142061	0.112353	-10.9668	1.58936e-25	5.79098e-24	46.8974	ABCG5	no
AC067956.1	-0.397605	0.226166	-10.9662	1.59796e-25	5.81876e-24	46.8921	AC067956.1	no
VSIG10L2	-0.0779276	0.0447297	-10.965	1.61636e-25	5.88216e-24	46.8807	VSIG10L2	no
AC132938.1	-1.66373	1.54714	-10.9636	1.63731e-25	5.95474e-24	46.868	AC132938.1	down
HSPB11	-0.927923	4.88251	-10.9631	1.64406e-25	5.97562e-24	46.8639	HSPB11	down
EIF5A2	-0.668607	1.64065	-10.9611	1.67453e-25	6.08265e-24	46.8457	EIF5A2	down
ABCC4	-1.37873	2.15453	-10.9594	1.70078e-25	6.17423e-24	46.8303	ABCC4	down
TP53INP2	-1.23157	5.4005	-10.9584	1.71617e-25	6.22631e-24	46.8214	TP53INP2	down
MIR22HG	-1.44666	4.68392	-10.9549	1.77223e-25	6.42575e-24	46.7895	MIR22HG	down
BCL11B	-1.06043	1.1915	-10.9545	1.77797e-25	6.44263e-24	46.7863	BCL11B	down
GPR155	-1.10432	2.38532	-10.9514	1.83033e-25	6.62834e-24	46.7576	GPR155	down
DZIP3	-0.901929	3.91502	-10.9491	1.86897e-25	6.76415e-24	46.7369	DZIP3	down
AC019211.1	-0.617073	0.37293	-10.9468	1.90751e-25	6.89943e-24	46.7166	AC019211.1	down
LONRF3	-1.45939	2.98162	-10.9426	1.98191e-25	7.16419e-24	46.6787	LONRF3	down
AL158166.1	1.29793	1.64032	10.9404	2.02336e-25	7.30955e-24	46.6582	AL158166.1	up
RARB	-1.27004	3.15386	-10.9364	2.09867e-25	7.57703e-24	46.622	RARB	down
ZNF852	-0.540258	1.09541	-10.9352	2.12152e-25	7.65485e-24	46.6113	ZNF852	down
TMEM198B	-1.13066	3.2359	-10.934	2.14503e-25	7.73499e-24	46.6004	TMEM198B	down
MYEF2	0.95348	2.29159	10.9324	2.17556e-25	7.84033e-24	46.5864	MYEF2	up
AC114956.2	-0.453526	0.739189	-10.9317	2.19061e-25	7.8898e-24	46.5795	AC114956.2	no
ZHX3	-0.996641	3.88826	-10.9304	2.21663e-25	7.97865e-24	46.5678	ZHX3	down
JUN	-1.86173	8.38911	-10.9302	2.22074e-25	7.98863e-24	46.566	JUN	down
AC064801.1	-0.879844	1.10391	-10.929	2.24348e-25	8.06554e-24	46.5559	AC064801.1	down
AC069224.1	-1.02282	1.99258	-10.9284	2.25652e-25	8.10752e-24	46.5502	AC069224.1	down
EDDM13	-0.409923	0.529263	-10.9278	2.26994e-25	8.1508e-24	46.5443	EDDM13	no
Z93943.1	-0.115335	0.0950262	-10.9267	2.29104e-25	8.2216e-24	46.5351	Z93943.1	no
AC124242.2	-0.527701	0.6107	-10.9245	2.3393e-25	8.38971e-24	46.5145	AC124242.2	down
GFUS	0.762294	6.03283	10.9239	2.35135e-25	8.42784e-24	46.5094	GFUS	up
SERHL2	-0.720772	1.23217	-10.9232	2.36699e-25	8.47878e-24	46.5028	SERHL2	down
TMEM79	1.44431	3.8465	10.9184	2.4711e-25	8.84638e-24	46.4602	TMEM79	up
GFRA3	-0.427501	0.267742	-10.918	2.48089e-25	8.87608e-24	46.4562	GFRA3	no
WFS1	-1.30815	5.43541	-10.9143	2.56631e-25	9.17249e-24	46.4227	WFS1	down
CSNK1A1L	-0.0837833	0.0528652	-10.9143	2.56682e-25	9.17249e-24	46.4225	CSNK1A1L	no
STEAP2	-1.31386	1.82034	-10.9133	2.5896e-25	9.24831e-24	46.4138	STEAP2	down
SCGB1D2	-0.856207	0.556292	-10.9089	2.69446e-25	9.61705e-24	46.3744	SCGB1D2	down
SETDB2	-0.765177	3.37384	-10.9068	2.74738e-25	9.80002e-24	46.3552	SETDB2	down
CLDN9	2.33064	3.95533	10.9014	2.88553e-25	1.02866e-23	46.3065	CLDN9	up
HPCAL4	2.5166	2.73988	10.8998	2.92655e-25	1.04266e-23	46.2926	HPCAL4	up
B3GALT5	-1.02581	0.746145	-10.8994	2.93845e-25	1.04628e-23	46.2885	B3GALT5	down
RARA-AS1	1.03304	2.70415	10.8966	3.0135e-25	1.07236e-23	46.2636	RARA-AS1	up
AC004877.1	-0.463199	0.192205	-10.8937	3.09354e-25	1.10018e-23	46.2376	AC004877.1	no
CCDC39-AS1	-0.489707	0.299974	-10.8886	3.24127e-25	1.15203e-23	46.1914	CCDC39-AS1	no
GLI3	-1.03452	2.16854	-10.8858	3.32483e-25	1.18102e-23	46.1661	GLI3	down
SMCR5	-0.157771	0.106669	-10.8824	3.42876e-25	1.21721e-23	46.1357	SMCR5	no
TYRO3	1.16797	2.28222	10.878	3.57091e-25	1.26692e-23	46.0954	TYRO3	up
LINC01625	-0.12367	0.0599878	-10.8761	3.63066e-25	1.28729e-23	46.079	LINC01625	no
HNRNPA1P27	2.19163	2.6049	10.8761	3.63267e-25	1.28729e-23	46.0784	HNRNPA1P27	up
AL391845.2	0.750732	0.777704	10.8751	3.66589e-25	1.29829e-23	46.0694	AL391845.2	up
TFDP1P1	-0.0735408	0.0177096	-10.873	3.73503e-25	1.32199e-23	46.0509	TFDP1P1	no
ADGRG3	-0.827177	0.642272	-10.8727	3.74625e-25	1.32517e-23	46.0479	ADGRG3	down
AC110998.1	-0.365366	0.306905	-10.8723	3.76051e-25	1.32942e-23	46.0442	AC110998.1	no
C5AR2	0.862932	1.27703	10.8692	3.8668e-25	1.36618e-23	46.0165	C5AR2	up
LINC02301	-0.241677	0.0785634	-10.865	4.01719e-25	1.41848e-23	45.9787	LINC02301	no
C6orf141	-0.711824	0.509885	-10.8623	4.11515e-25	1.4522e-23	45.9549	C6orf141	down
CATSPERB	-0.272878	0.273538	-10.8595	4.22303e-25	1.48939e-23	45.9292	CATSPERB	no
AC008895.1	-0.271843	0.377288	-10.8563	4.34681e-25	1.53213e-23	45.9006	AC008895.1	no
HRH1	1.58403	2.69995	10.8535	4.45682e-25	1.56998e-23	45.8759	HRH1	up
KRT15	1.6013	1.58993	10.8513	4.54778e-25	1.60107e-23	45.8558	KRT15	up
AC010636.1	-0.845819	0.92261	-10.8511	4.55828e-25	1.60382e-23	45.8536	AC010636.1	down
EPHA10	1.68714	1.83893	10.8494	4.62905e-25	1.62776e-23	45.8383	EPHA10	up
AC067751.1	-0.27046	0.231357	-10.8476	4.70292e-25	1.65275e-23	45.8226	AC067751.1	no
AC063952.1	-0.236115	0.144236	-10.8474	4.71269e-25	1.65521e-23	45.8205	AC063952.1	no
BCAP29	-0.45345	0.609909	-10.8425	4.92423e-25	1.72848e-23	45.7771	BCAP29	no
LRRIQ3	-0.542094	0.548531	-10.8414	4.97457e-25	1.74512e-23	45.767	LRRIQ3	down
DOK6	-0.848478	0.88025	-10.8409	4.9966e-25	1.75182e-23	45.7626	DOK6	down
HIGD1B	1.47804	2.8396	10.8384	5.1129e-25	1.79154e-23	45.7398	HIGD1B	up
DPY19L2	-1.48155	2.39596	-10.8293	5.55373e-25	1.94485e-23	45.6579	DPY19L2	down
DYRK3-AS1	-0.511822	0.542114	-10.8287	5.58296e-25	1.95394e-23	45.6527	DYRK3-AS1	down
AC106707.1	-0.0409346	0.00977906	-10.8281	5.61371e-25	1.96354e-23	45.6472	AC106707.1	no
SAMD5	-1.38315	1.30772	-10.8253	5.75734e-25	2.0126e-23	45.6222	SAMD5	down
B3GNT3	3.57996	4.01345	10.8232	5.86536e-25	2.04915e-23	45.6038	B3GNT3	up
PCGF5	-0.893266	4.59262	-10.8227	5.89548e-25	2.05847e-23	45.5987	PCGF5	down
AC012467.1	-0.911365	0.860416	-10.8207	5.99911e-25	2.09342e-23	45.5815	AC012467.1	down
AL118511.1	-0.554966	0.617561	-10.8196	6.06256e-25	2.11432e-23	45.571	AL118511.1	down
AC062029.1	-0.709836	1.61874	-10.8175	6.17584e-25	2.15256e-23	45.5527	AC062029.1	down
LSMEM2	-0.259255	0.162486	-10.8162	6.25167e-25	2.17771e-23	45.5406	LSMEM2	no
SLC6A12-AS1	-0.912993	1.05672	-10.8149	6.32471e-25	2.20187e-23	45.5291	SLC6A12-AS1	down
C9orf43	-0.610083	0.907249	-10.811	6.5548e-25	2.28063e-23	45.4937	C9orf43	down
AC125603.3	-0.68331	0.4164	-10.8096	6.63374e-25	2.30675e-23	45.4818	AC125603.3	down
AC093677.2	-0.459259	0.78713	-10.8087	6.68845e-25	2.32441e-23	45.4737	AC093677.2	no
AL353704.1	-0.21866	0.138896	-10.801	7.17573e-25	2.4923e-23	45.404	AL353704.1	no
AC093270.1	-0.467876	0.372437	-10.7965	7.47016e-25	2.59304e-23	45.3642	AC093270.1	no
CBX2	0.742407	1.65132	10.7957	7.5237e-25	2.60801e-23	45.3571	CBX2	up
OSTN	-0.18859	0.0461832	-10.7957	7.52467e-25	2.60801e-23	45.357	OSTN	no
TBC1D2	1.54871	6.00467	10.7957	7.52644e-25	2.60801e-23	45.3568	TBC1D2	up
AL137025.1	-0.349472	0.375473	-10.7939	7.64498e-25	2.64754e-23	45.3413	AL137025.1	no
TFDP1P2	-0.684939	0.607506	-10.7902	7.91008e-25	2.73775e-23	45.3075	TFDP1P2	down
ZNF782	-0.720169	1.98131	-10.7875	8.1014e-25	2.80234e-23	45.2838	ZNF782	down
NAT8L	2.24347	3.9416	10.7832	8.42711e-25	2.91331e-23	45.2448	NAT8L	up
BTG4	-0.0753765	0.0298273	-10.7824	8.48294e-25	2.93091e-23	45.2383	BTG4	no
FRG1-DT	-0.371156	0.458027	-10.781	8.59539e-25	2.96803e-23	45.2252	FRG1-DT	no
ALDH1B1	-1.2098	4.62876	-10.7762	8.97498e-25	3.09731e-23	45.1824	ALDH1B1	down
RPS29P11	3.11026	3.57019	10.775	9.07123e-25	3.12827e-23	45.1718	RPS29P11	up
HAGLROS	1.21496	1.26972	10.775	9.07524e-25	3.12827e-23	45.1714	HAGLROS	up
IDI1	-0.784595	4.51383	-10.7738	9.17494e-25	3.16081e-23	45.1606	IDI1	down
AL121821.2	-0.578559	0.29748	-10.7728	9.25801e-25	3.18758e-23	45.1516	AL121821.2	down
MINDY1	-1.08462	5.60373	-10.7709	9.41172e-25	3.23862e-23	45.1353	MINDY1	down
SDK2	-1.17147	1.19496	-10.7704	9.45508e-25	3.25166e-23	45.1308	SDK2	down
PRDM16	-1.35781	3.2584	-10.7697	9.51914e-25	3.2718e-23	45.1241	PRDM16	down
AC124319.3	-0.282995	0.264793	-10.7685	9.62435e-25	3.30605e-23	45.1132	AC124319.3	no
GOLGA8K	-0.446429	0.365339	-10.7654	9.89291e-25	3.39483e-23	45.0859	GOLGA8K	no
FAM43A	1.6975	5.06638	10.7654	9.89621e-25	3.39483e-23	45.0856	FAM43A	up
LINC01792	-0.0339705	0.00930587	-10.7653	9.89995e-25	3.39483e-23	45.0852	LINC01792	no
IRF5	1.07058	3.31647	10.7652	9.91167e-25	3.39689e-23	45.0841	IRF5	up
ZNF548	-0.648917	3.05856	-10.7651	9.91937e-25	3.39757e-23	45.0833	ZNF548	down
TSKS	-0.320564	0.297942	-10.7648	9.94564e-25	3.40461e-23	45.0807	TSKS	no
SERPIND1	-1.10904	0.550653	-10.7634	1.00725e-24	3.44606e-23	45.0681	SERPIND1	down
GRIK4	-1.56611	1.3053	-10.7629	1.01146e-24	3.45846e-23	45.064	GRIK4	down
AL355578.1	-0.103662	0.030723	-10.7607	1.0321e-24	3.52701e-23	45.044	AL355578.1	no
SNAI1	-1.61113	3.63666	-10.7587	1.05091e-24	3.58922e-23	45.0261	SNAI1	down
AC092068.1	-0.797637	0.440527	-10.7585	1.05286e-24	3.5938e-23	45.0243	AC092068.1	down
TRPM3	-0.597304	0.28663	-10.7574	1.06338e-24	3.62724e-23	45.0144	TRPM3	down
AF274853.1	-0.179168	0.138424	-10.7573	1.06387e-24	3.62724e-23	45.0139	AF274853.1	no
ERO1B	-1.35496	3.99646	-10.7547	1.08992e-24	3.71392e-23	44.99	ERO1B	down
PLA2G7	-1.70182	4.32862	-10.7525	1.11115e-24	3.7841e-23	44.9709	PLA2G7	down
AL136164.3	-0.334123	0.313237	-10.7523	1.11379e-24	3.79089e-23	44.9685	AL136164.3	no
RNVU1-30	-1.21587	0.948438	-10.7517	1.11906e-24	3.80668e-23	44.9638	RNVU1-30	down
COPDA1	-1.01062	0.499628	-10.7442	1.19786e-24	4.07238e-23	44.8965	COPDA1	down
DPH6-DT	-0.551199	0.658667	-10.7434	1.20658e-24	4.09968e-23	44.8893	DPH6-DT	down
CNTN3	-1.1578	1.19139	-10.7411	1.23191e-24	4.18336e-23	44.8687	CNTN3	down
AC006058.1	-1.87186	3.55317	-10.7402	1.24124e-24	4.21262e-23	44.8612	AC006058.1	down
UXT-AS1	-0.466118	0.88059	-10.7386	1.25933e-24	4.2716e-23	44.8469	UXT-AS1	no
AP000911.1	-0.564447	0.746719	-10.7377	1.27012e-24	4.30572e-23	44.8384	AP000911.1	down
TTC29	-0.326317	0.133051	-10.7372	1.2753e-24	4.32083e-23	44.8344	TTC29	no
CLN5	-0.732973	2.00079	-10.7357	1.29355e-24	4.38015e-23	44.8203	CLN5	down
NDRG2	-1.04308	4.64521	-10.7339	1.31369e-24	4.44583e-23	44.805	NDRG2	down
ELL2	-1.07382	4.3979	-10.7321	1.33588e-24	4.51835e-23	44.7884	ELL2	down
MAMLD1	1.74781	3.04322	10.7304	1.3566e-24	4.58583e-23	44.7732	MAMLD1	up
NUDT7	-0.784091	1.98702	-10.7276	1.39095e-24	4.69926e-23	44.7484	NUDT7	down
STING1	1.4045	5.75082	10.7269	1.3994e-24	4.72512e-23	44.7424	STING1	up
TMPRSS6	3.62041	3.65968	10.7268	1.40118e-24	4.72844e-23	44.7412	TMPRSS6	up
AC011773.4	-0.394647	0.34808	-10.7238	1.43942e-24	4.85475e-23	44.7145	AC011773.4	no
GHRLOS	-0.452282	0.612344	-10.7217	1.46719e-24	4.94558e-23	44.6956	GHRLOS	no
RNF24	1.0048	4.56887	10.7204	1.48458e-24	4.99983e-23	44.6839	RNF24	up
CSPP1	-0.450172	1.22365	-10.7203	1.48496e-24	4.99983e-23	44.6836	CSPP1	no
LIMD1-AS1	-0.384866	0.454171	-10.7171	1.52905e-24	5.14534e-23	44.6547	LIMD1-AS1	no
RPL21P54	-0.356326	0.193718	-10.717	1.53038e-24	5.14689e-23	44.6538	RPL21P54	no
HIGD2B	-0.256135	0.142439	-10.7122	1.59749e-24	5.36956e-23	44.6113	HIGD2B	no
TMEM229A	-0.118413	0.0399591	-10.7107	1.61973e-24	5.44126e-23	44.5976	TMEM229A	no
AC007191.1	-0.796912	1.25492	-10.7105	1.62174e-24	5.44491e-23	44.5964	AC007191.1	down
DCAF17	-0.960071	3.29393	-10.7103	1.62457e-24	5.45134e-23	44.5946	DCAF17	down
CFI	1.52569	3.04283	10.7097	1.63473e-24	5.48234e-23	44.5885	CFI	up
AC139100.2	-1.12563	1.52253	-10.7095	1.63635e-24	5.48467e-23	44.5875	AC139100.2	down
C11orf52	-0.179603	0.0979967	-10.7069	1.67637e-24	5.61565e-23	44.5635	C11orf52	no
PKN2-AS1	-0.16772	0.263508	-10.7064	1.68338e-24	5.63595e-23	44.5594	PKN2-AS1	no
TMPRSS4	3.0866	3.13361	10.7053	1.69929e-24	5.68604e-23	44.5501	TMPRSS4	up
GSTM3	-1.67516	4.40804	-10.7052	1.70164e-24	5.69069e-23	44.5487	GSTM3	down
PAXBP1-AS1	-0.600091	1.08231	-10.704	1.72058e-24	5.75077e-23	44.5378	PAXBP1-AS1	down
LINC01135	-0.974255	2.04865	-10.6995	1.79139e-24	5.98408e-23	44.4978	LINC01135	down
AC135352.1	-1.08346	1.21511	-10.6975	1.82351e-24	6.08563e-23	44.4802	AC135352.1	down
MAP1LC3C	-1.19709	1.47058	-10.6975	1.82384e-24	6.08563e-23	44.48	MAP1LC3C	down
LINC02625	-0.38686	0.216904	-10.6973	1.82722e-24	6.0935e-23	44.4782	LINC02625	no
AC090186.1	-0.491321	0.487452	-10.6969	1.83253e-24	6.1078e-23	44.4753	AC090186.1	no
LRG1	2.21362	3.20283	10.6968	1.83479e-24	6.11187e-23	44.4741	LRG1	up
GABPB2	-0.679332	2.91593	-10.6963	1.8436e-24	6.13779e-23	44.4694	GABPB2	down
XPR1	1.25155	5.41033	10.6931	1.89732e-24	6.31311e-23	44.4409	XPR1	up
MPC1	-0.87735	6.20082	-10.6914	1.92571e-24	6.40397e-23	44.4262	MPC1	down
ANKRD9	-1.03154	2.73752	-10.6894	1.96141e-24	6.51906e-23	44.408	ANKRD9	down
AC026316.5	-0.0971907	0.0413809	-10.6878	1.99029e-24	6.61134e-23	44.3935	AC026316.5	no
LINC01362	-0.0870342	0.0464231	-10.6876	1.99297e-24	6.61656e-23	44.3922	LINC01362	no
AL162585.1	-0.75428	0.394793	-10.686	2.02124e-24	6.70666e-23	44.3782	AL162585.1	down
DRAXIN	1.04207	1.13095	10.6831	2.07437e-24	6.8791e-23	44.3526	DRAXIN	up
RILPL1	-0.988977	2.95997	-10.6825	2.08572e-24	6.9129e-23	44.3471	RILPL1	down
AL355870.1	-0.298995	0.143918	-10.6815	2.1047e-24	6.9719e-23	44.3382	AL355870.1	no
FIBIN	-2.07457	2.42208	-10.681	2.11429e-24	6.99979e-23	44.3337	FIBIN	down
AC004832.1	-0.118754	0.0378696	-10.6772	2.18782e-24	7.23917e-23	44.2998	AC004832.1	no
ZNF235	-0.598254	1.54705	-10.6759	2.21436e-24	7.32292e-23	44.2879	ZNF235	down
LRRC2	-1.47624	4.16436	-10.6753	2.22663e-24	7.35941e-23	44.2824	LRRC2	down
ETFBKMT	-0.64623	1.75411	-10.6744	2.24329e-24	7.41033e-23	44.275	ETFBKMT	down
CTAGE3P	-0.107947	0.0664211	-10.6735	2.26176e-24	7.4672e-23	44.2669	CTAGE3P	no
TCEANC	-0.590214	1.86331	-10.6728	2.27641e-24	7.51138e-23	44.2605	TCEANC	down
MEF2C-AS1	-0.526028	0.681538	-10.6706	2.32266e-24	7.65976e-23	44.2406	MEF2C-AS1	down
FAT4	-1.11629	2.18454	-10.6703	2.32762e-24	7.67187e-23	44.2385	FAT4	down
HSD17B3	-0.0466191	0.017082	-10.6673	2.39074e-24	7.87554e-23	44.212	HSD17B3	no
AC021733.4	-0.105263	0.0914413	-10.6658	2.42449e-24	7.98227e-23	44.1981	AC021733.4	no
AC019193.3	-0.50947	0.359738	-10.6597	2.55913e-24	8.42091e-23	44.1445	AC019193.3	down
TTC41P	-0.484692	0.698724	-10.6567	2.63103e-24	8.65269e-23	44.1171	TTC41P	no
BBOF1	-0.855799	3.06138	-10.653	2.7177e-24	8.93278e-23	44.085	BBOF1	down
CORO2A	1.41864	3.6789	10.6522	2.73815e-24	8.99502e-23	44.0776	CORO2A	up
PSD3	1.50576	4.31872	10.6463	2.88681e-24	9.47814e-23	44.0252	PSD3	up
TLCD1	0.942921	4.29945	10.6452	2.91476e-24	9.56463e-23	44.0157	TLCD1	up
AC011416.4	-0.139205	0.153421	-10.6448	2.9264e-24	9.59753e-23	44.0117	AC011416.4	no
TAFA5	1.29171	1.90757	10.6422	2.99445e-24	9.81529e-23	43.989	TAFA5	up
AC007255.1	2.46649	2.57038	10.6402	3.04892e-24	9.98833e-23	43.9711	AC007255.1	up
TSPAN5	-1.25692	3.55966	-10.6384	3.09805e-24	1.01437e-22	43.9553	TSPAN5	down
TNFRSF12A	2.07763	7.66239	10.6326	3.26283e-24	1.06773e-22	43.904	TNFRSF12A	up
TMEM220-AS1	-0.582838	0.852216	-10.6321	3.27872e-24	1.07234e-22	43.8991	TMEM220-AS1	down
AC128687.1	-0.274539	0.166101	-10.6297	3.34927e-24	1.09481e-22	43.8781	AC128687.1	no
BEX3	-1.00533	8.69511	-10.6289	3.37291e-24	1.10194e-22	43.8711	BEX3	down
DHDH	1.4804	1.97474	10.626	3.46252e-24	1.13059e-22	43.8451	DHDH	up
AC107081.2	-0.139803	0.0875921	-10.6254	3.48028e-24	1.13577e-22	43.8401	AC107081.2	no
AL844170.1	-0.110916	0.0516836	-10.6239	3.52799e-24	1.1507e-22	43.8266	AL844170.1	no
AL138756.1	0.62763	1.89781	10.6236	3.53749e-24	1.15317e-22	43.8239	AL138756.1	up
AL157400.3	-0.277003	0.33035	-10.6235	3.54071e-24	1.15359e-22	43.823	AL157400.3	no
DGLUCY	-0.693714	4.57064	-10.6229	3.55992e-24	1.15921e-22	43.8177	DGLUCY	down
AP000704.1	-0.513859	1.17421	-10.6192	3.6794e-24	1.19746e-22	43.785	AP000704.1	down
STOX2	-0.940586	2.24508	-10.6172	3.74399e-24	1.21781e-22	43.7677	STOX2	down
PRICKLE2-AS2	-0.260317	0.12048	-10.6147	3.83105e-24	1.24545e-22	43.745	PRICKLE2-AS2	no
LINC01258	-0.0610955	0.0250063	-10.6139	3.85843e-24	1.25366e-22	43.7379	LINC01258	no
SYDE2	-0.97546	1.88835	-10.6131	3.88526e-24	1.26169e-22	43.731	SYDE2	down
NR4A1AS	-1.79071	1.93968	-10.6113	3.94955e-24	1.28187e-22	43.7148	NR4A1AS	down
AL139274.2	-0.302219	0.413814	-10.6105	3.97615e-24	1.2898e-22	43.7081	AL139274.2	no
AC062037.3	-0.446894	0.274916	-10.6078	4.0742e-24	1.32088e-22	43.684	AC062037.3	no
ADH6	-0.109178	0.102952	-10.6069	4.10588e-24	1.33043e-22	43.6763	ADH6	no
LRRC52-AS1	2.58359	2.43399	10.6017	4.30154e-24	1.39307e-22	43.6302	LRRC52-AS1	up
AL354872.1	-0.977695	1.33493	-10.6007	4.34235e-24	1.40552e-22	43.6209	AL354872.1	down
SHPRH	-0.919259	1.49947	-10.6001	4.36419e-24	1.41182e-22	43.6159	SHPRH	down
IQCH	-0.765864	1.44918	-10.599	4.40579e-24	1.4245e-22	43.6065	IQCH	down
FAM185BP	-0.808435	1.72916	-10.5989	4.41213e-24	1.42577e-22	43.6051	FAM185BP	down
ING3	-0.812845	3.23961	-10.5985	4.42528e-24	1.42925e-22	43.6022	ING3	down
AC020612.3	-0.542665	0.557022	-10.5955	4.54543e-24	1.46725e-22	43.5756	AC020612.3	down
LINC02147	-0.297647	0.287075	-10.5946	4.58432e-24	1.479e-22	43.5672	LINC02147	no
AL163973.2	-0.133806	0.0276482	-10.5938	4.61821e-24	1.48913e-22	43.5599	AL163973.2	no
TNFRSF10B	0.89034	5.50231	10.5927	4.66417e-24	1.50313e-22	43.5501	TNFRSF10B	up
AL161804.1	-0.183548	0.110132	-10.5917	4.70349e-24	1.51498e-22	43.5418	AL161804.1	no
ELL2P1	-0.230904	0.241422	-10.5868	4.91488e-24	1.58221e-22	43.4982	ELL2P1	no
AC010735.2	-1.37121	1.86744	-10.5861	4.94443e-24	1.59087e-22	43.4923	AC010735.2	down
ADD3	-1.1582	5.96529	-10.5835	5.06348e-24	1.62829e-22	43.4687	ADD3	down
AP002026.1	-0.405065	0.496189	-10.5808	5.18303e-24	1.66583e-22	43.4456	AP002026.1	no
RN7SL832P	-0.687803	0.990149	-10.5746	5.47972e-24	1.76024e-22	43.3905	RN7SL832P	down
SLC24A3	-1.50647	2.02152	-10.5728	5.56592e-24	1.78696e-22	43.3751	SLC24A3	down
TSPAN11	-1.11256	1.31211	-10.5711	5.65536e-24	1.81469e-22	43.3593	TSPAN11	down
HLF	-2.01296	3.19852	-10.5696	5.72969e-24	1.83755e-22	43.3463	HLF	down
AL031726.1	-0.219952	0.116241	-10.5658	5.92476e-24	1.89909e-22	43.3132	AL031726.1	no
AMIGO2	1.81372	4.38078	10.5654	5.95053e-24	1.90632e-22	43.3089	AMIGO2	up
AC006566.1	0.798947	1.73527	10.5644	6.00216e-24	1.92182e-22	43.3003	AC006566.1	up
ACTN3	-0.151587	0.0789213	-10.5566	6.43321e-24	2.05873e-22	43.2317	ACTN3	no
SLC25A15	-1.79035	3.90648	-10.5561	6.46303e-24	2.06716e-22	43.2271	SLC25A15	down
UQCRFS1P3	-0.37895	0.229896	-10.5531	6.63741e-24	2.12179e-22	43.2007	UQCRFS1P3	no
MEOX2	-1.35632	2.24103	-10.5517	6.72165e-24	2.14757e-22	43.1882	MEOX2	down
EPB41L2	-1.02649	3.80787	-10.5446	7.15684e-24	2.28538e-22	43.1261	EPB41L2	down
LINC01564	-0.316792	0.146544	-10.5435	7.22653e-24	2.3064e-22	43.1165	LINC01564	no
RAVER2	-0.824559	2.92728	-10.5419	7.33479e-24	2.33969e-22	43.1018	RAVER2	down
SMIM8	-0.468537	1.80283	-10.5404	7.43207e-24	2.36945e-22	43.0887	SMIM8	no
PGAP6	0.74173	6.0482	10.5388	7.53722e-24	2.40169e-22	43.0748	PGAP6	up
SENP8	-0.697468	2.09993	-10.537	7.66234e-24	2.44025e-22	43.0585	SENP8	down
ZNF891	-0.516891	1.03993	-10.5365	7.69439e-24	2.44914e-22	43.0544	ZNF891	down
AC245123.1	-0.174611	0.0757992	-10.5354	7.76939e-24	2.47169e-22	43.0448	AC245123.1	no
TRIM45	-1.03454	2.54757	-10.5336	7.89806e-24	2.51128e-22	43.0285	TRIM45	down
GPM6B	-0.988713	2.13316	-10.5329	7.94163e-24	2.52378e-22	43.0231	GPM6B	down
CPQ	-1.30323	7.53155	-10.5315	8.04736e-24	2.55602e-22	43.01	CPQ	down
WDR64	-0.129287	0.109174	-10.5293	8.20443e-24	2.60451e-22	42.9908	WDR64	no
NFATC2	-0.915277	3.36923	-10.5249	8.52964e-24	2.70631e-22	42.9523	NFATC2	down
PDLIM7	1.0418	5.04145	10.5242	8.58333e-24	2.72189e-22	42.9461	PDLIM7	up
CHST2	1.70324	5.99177	10.5228	8.69037e-24	2.75436e-22	42.9339	CHST2	up
LDLRAD4-AS1	-0.17545	0.105395	-10.5204	8.88089e-24	2.81325e-22	42.9124	LDLRAD4-AS1	no
KLK13	1.36318	1.70956	10.518	9.07167e-24	2.87215e-22	42.8913	KLK13	up
GOLGA8R	-0.994305	0.955107	-10.5122	9.54669e-24	3.02093e-22	42.8408	GOLGA8R	down
CHRNA4	-0.914313	0.557167	-10.511	9.6547e-24	3.05349e-22	42.8297	CHRNA4	down
AL355483.2	-0.441987	0.19639	-10.5096	9.77631e-24	3.0903e-22	42.8173	AL355483.2	no
GDAP1	-0.57501	1.61447	-10.509	9.82796e-24	3.10498e-22	42.812	GDAP1	down
PI4K2A	0.801949	5.3044	10.5079	9.9258e-24	3.13422e-22	42.8022	PI4K2A	up
AL390726.2	-0.172361	0.063951	-10.5078	9.93145e-24	3.13434e-22	42.8017	AL390726.2	no
AC129507.1	-0.476712	0.386077	-10.5075	9.95835e-24	3.14116e-22	42.799	AC129507.1	no
DTX4	2.45232	6.80688	10.5074	9.96866e-24	3.14255e-22	42.798	DTX4	up
C4orf48	1.97787	4.80051	10.5073	9.97334e-24	3.14255e-22	42.7975	C4orf48	up
AC079949.1	-0.287881	0.242959	-10.507	9.99767e-24	3.14855e-22	42.7951	AC079949.1	no
RS1	-0.360277	0.327599	-10.5021	1.04498e-23	3.28919e-22	42.7513	RS1	no
AC023509.3	-1.1328	2.52874	-10.5008	1.05675e-23	3.32449e-22	42.7402	AC023509.3	down
ABTB2	1.72136	3.71179	10.4999	1.0656e-23	3.35056e-22	42.7319	ABTB2	up
SREBF1	1.04963	5.69129	10.4982	1.08128e-23	3.39804e-22	42.7175	SREBF1	up
FCGBP	-1.87866	6.74552	-10.497	1.09278e-23	3.43239e-22	42.707	FCGBP	down
GLULP4	-0.205842	0.169696	-10.491	1.15295e-23	3.61944e-22	42.6539	GLULP4	no
TIMP1	2.43312	9.73009	10.4898	1.16462e-23	3.65417e-22	42.644	TIMP1	up
SPATA2	-0.828812	4.2532	-10.4897	1.16602e-23	3.65663e-22	42.6428	SPATA2	down
FGF7	-1.56748	1.41448	-10.4872	1.19202e-23	3.73618e-22	42.6209	FGF7	down
AC092807.3	-0.428751	0.618383	-10.4843	1.22357e-23	3.83306e-22	42.5951	AC092807.3	no
ZEB2P1	-0.0860776	0.0300621	-10.4841	1.22555e-23	3.83725e-22	42.5935	ZEB2P1	no
AL662907.2	-0.254178	0.389062	-10.483	1.23755e-23	3.87276e-22	42.5838	AL662907.2	no
AL513478.4	-0.0669862	0.0330064	-10.4809	1.26138e-23	3.94525e-22	42.5649	AL513478.4	no
MGC16275	-0.811562	1.1381	-10.4804	1.26637e-23	3.95878e-22	42.561	MGC16275	down
AC011477.3	-0.547897	0.568179	-10.4799	1.27153e-23	3.97284e-22	42.557	AC011477.3	down
VAPB	-0.909181	4.64955	-10.4798	1.27324e-23	3.97609e-22	42.5557	VAPB	down
FAM234B	-1.24593	2.8603	-10.4781	1.29251e-23	4.03414e-22	42.5408	FAM234B	down
NUDT16	-0.915763	4.85971	-10.4779	1.29515e-23	4.04026e-22	42.5388	NUDT16	down
PKNOX2	-2.38028	2.3449	-10.4776	1.29773e-23	4.04617e-22	42.5368	PKNOX2	down
ACOT11	-0.987747	2.02734	-10.4757	1.31982e-23	4.11288e-22	42.5201	ACOT11	down
WDR93	-0.797576	1.29257	-10.4735	1.34595e-23	4.19213e-22	42.5007	WDR93	down
AC010210.1	-0.768592	1.00604	-10.4734	1.34731e-23	4.19418e-22	42.4997	AC010210.1	down
EGR2	-2.40234	5.46425	-10.4707	1.37999e-23	4.29366e-22	42.4759	EGR2	down
TBILA	-1.37519	2.57631	-10.4706	1.38125e-23	4.29532e-22	42.475	TBILA	down
ZBTB44-DT	-0.46209	0.852207	-10.4688	1.40328e-23	4.36156e-22	42.4594	ZBTB44-DT	no
MNS1	-0.84501	2.29404	-10.4661	1.43732e-23	4.465e-22	42.4357	MNS1	down
FAM104B	-0.668838	4.02734	-10.4658	1.44122e-23	4.47478e-22	42.433	FAM104B	down
VASP	0.750502	6.3522	10.4643	1.46107e-23	4.53406e-22	42.4194	VASP	up
LINC02268	-0.176442	0.0838459	-10.4625	1.48384e-23	4.6023e-22	42.4041	LINC02268	no
AC090505.1	0.835597	0.898184	10.4611	1.50298e-23	4.65922e-22	42.3914	AC090505.1	up
AL137157.1	-0.187284	0.13516	-10.4574	1.55288e-23	4.81142e-22	42.3591	AL137157.1	no
TESC	2.38522	6.39749	10.4565	1.56575e-23	4.84878e-22	42.3509	TESC	up
FZD8	-1.2052	3.40355	-10.4512	1.63979e-23	5.0754e-22	42.3052	FZD8	down
SLMAP	-0.923898	3.56638	-10.451	1.64268e-23	5.08171e-22	42.3034	SLMAP	down
FAM111B	1.4759	2.27546	10.4498	1.66097e-23	5.13562e-22	42.2925	FAM111B	up
CBARP	0.78166	1.21438	10.4457	1.72195e-23	5.32139e-22	42.2568	CBARP	up
ACBD7	1.61197	3.46729	10.4455	1.72464e-23	5.32692e-22	42.2552	ACBD7	up
PPP1R14BP3	0.916733	5.62237	10.4451	1.732e-23	5.34688e-22	42.251	PPP1R14BP3	up
RBM15	-0.5493	2.90555	-10.4439	1.74995e-23	5.39951e-22	42.2408	RBM15	down
AC004943.1	-0.442815	0.641985	-10.4434	1.75759e-23	5.42025e-22	42.2365	AC004943.1	no
AC018521.5	-0.833307	1.74329	-10.443	1.7637e-23	5.43626e-22	42.233	AC018521.5	down
AC005225.2	-0.117788	0.0959053	-10.4425	1.77151e-23	5.45752e-22	42.2287	AC005225.2	no
TUBB1	-0.274917	0.231156	-10.4413	1.79092e-23	5.51447e-22	42.2179	TUBB1	no
AP000997.4	0.446205	0.450082	10.4408	1.79789e-23	5.53305e-22	42.214	AP000997.4	no
PPP1R13B	-0.886538	4.93179	-10.4379	1.84569e-23	5.6772e-22	42.1881	PPP1R13B	down
METTL24	-0.870306	0.665038	-10.4345	1.90081e-23	5.84374e-22	42.1589	METTL24	down
NEK11	-0.858468	3.48996	-10.4342	1.9069e-23	5.85944e-22	42.1558	NEK11	down
NHS	-0.972698	1.29343	-10.4338	1.91374e-23	5.87739e-22	42.1522	NHS	down
ANKRD18CP	-0.272217	0.26027	-10.4322	1.94027e-23	5.95582e-22	42.1386	ANKRD18CP	no
TEX14	-0.141914	0.147649	-10.4316	1.95108e-23	5.98591e-22	42.1331	TEX14	no
KCND3	-0.661385	0.575959	-10.431	1.96037e-23	6.01131e-22	42.1284	KCND3	down
BEX1	-2.78301	4.46145	-10.4292	1.99345e-23	6.10958e-22	42.1118	BEX1	down
PPP1R42	-0.664404	0.7429	-10.429	1.99621e-23	6.11471e-22	42.1104	PPP1R42	down
MAGEL2	-1.08723	0.930087	-10.4289	1.99718e-23	6.11471e-22	42.11	MAGEL2	down
AL356512.1	-0.608781	0.800292	-10.428	2.01373e-23	6.16219e-22	42.1018	AL356512.1	down
BMPR1B	-0.390908	0.243026	-10.4262	2.04677e-23	6.26009e-22	42.0857	BMPR1B	no
MTMR4	-0.958662	4.00696	-10.421	2.14198e-23	6.54792e-22	42.0407	MTMR4	down
LPL	1.79161	4.3554	10.4202	2.1566e-23	6.58921e-22	42.0339	LPL	up
VLDLR-AS1	-0.86531	0.827266	-10.4194	2.17321e-23	6.63656e-22	42.0263	VLDLR-AS1	down
TTLL9	-0.470578	0.51703	-10.4189	2.18177e-23	6.65929e-22	42.0224	TTLL9	no
AC145423.2	-0.932574	1.49913	-10.4185	2.1896e-23	6.67973e-22	42.0189	AC145423.2	down
PGM5P4-AS1	-0.125412	0.0832067	-10.4181	2.1972e-23	6.6995e-22	42.0155	PGM5P4-AS1	no
LINC01137	0.758983	2.9548	10.4174	2.21182e-23	6.74061e-22	42.0089	LINC01137	up
DYRK3	-0.895934	2.57367	-10.4169	2.22228e-23	6.769e-22	42.0042	DYRK3	down
KDELR3	1.22901	5.15293	10.416	2.23904e-23	6.81655e-22	41.9968	KDELR3	up
NAB2	1.55876	6.97305	10.4115	2.3292e-23	7.08743e-22	41.9577	NAB2	up
RPEP6	-0.139245	0.0356152	-10.4094	2.37248e-23	7.21541e-22	41.9395	RPEP6	no
PTCSC1	-1.27452	1.07197	-10.4085	2.39267e-23	7.27311e-22	41.9311	PTCSC1	down
DYSF	1.1094	4.35289	10.4063	2.43869e-23	7.40921e-22	41.9122	DYSF	up
AC098818.2	-0.217768	0.103822	-10.4003	2.57098e-23	7.80713e-22	41.8599	AC098818.2	no
AP002495.1	-0.405268	1.11118	-10.3982	2.62105e-23	7.95512e-22	41.8408	AP002495.1	no
HES6	1.7701	4.14099	10.3974	2.6387e-23	8.00459e-22	41.8342	HES6	up
RN7SKP285	-0.279757	0.115128	-10.3969	2.65018e-23	8.03532e-22	41.8299	RN7SKP285	no
AASS	-0.932803	3.07554	-10.3944	2.70958e-23	8.21124e-22	41.8079	AASS	down
BANCR	-0.914245	0.867012	-10.3933	2.73633e-23	8.28805e-22	41.7982	BANCR	down
NR1D1	1.81276	5.36892	10.3909	2.79345e-23	8.45675e-22	41.7778	NR1D1	up
USP54	-1.13009	5.04737	-10.3908	2.79648e-23	8.46164e-22	41.7767	USP54	down
CA5A	-0.632199	0.507175	-10.3867	2.89972e-23	8.76955e-22	41.7408	CA5A	down
AL354710.2	-0.386037	0.198622	-10.3857	2.92399e-23	8.83844e-22	41.7325	AL354710.2	no
CNTLN	-0.599341	1.67392	-10.3837	2.97634e-23	8.98979e-22	41.715	CNTLN	down
RPL6P12	-0.107175	0.0380725	-10.3837	2.97708e-23	8.98979e-22	41.7147	RPL6P12	no
ASPHD1	1.60405	1.79189	10.3835	2.98276e-23	9.00237e-22	41.7128	ASPHD1	up
FOXN1	-0.614734	0.465503	-10.3826	3.00582e-23	9.06735e-22	41.7052	FOXN1	down
DOK5	-1.29482	2.33378	-10.3804	3.06617e-23	9.24471e-22	41.6855	DOK5	down
DZANK1	-0.819328	2.25574	-10.3787	3.11225e-23	9.3789e-22	41.6708	DZANK1	down
AL031985.3	0.99993	2.38239	10.3779	3.13364e-23	9.43856e-22	41.664	AL031985.3	up
UCN	1.23792	2.66773	10.3772	3.15174e-23	9.48827e-22	41.6583	UCN	up
SEMA3B-AS1	-1.19734	3.11209	-10.3761	3.18236e-23	9.57561e-22	41.6487	SEMA3B-AS1	down
SOSTDC1	-1.32142	0.875009	-10.3702	3.35303e-23	1.0084e-21	41.597	SOSTDC1	down
AC121757.2	-1.12502	2.75557	-10.3697	3.36799e-23	1.01239e-21	41.5926	AC121757.2	down
AP001021.2	-0.615951	0.429816	-10.3637	3.55202e-23	1.06717e-21	41.5399	AP001021.2	down
AC091196.1	-0.108091	0.0585705	-10.361	3.63691e-23	1.09212e-21	41.5166	AC091196.1	no
AC098820.1	-0.320652	0.278866	-10.3579	3.73815e-23	1.12195e-21	41.4894	AC098820.1	no
ANAPC15	-0.650586	2.53053	-10.3577	3.74167e-23	1.12245e-21	41.4884	ANAPC15	down
TMEM178A	-1.28651	2.56752	-10.3568	3.77318e-23	1.13132e-21	41.4801	TMEM178A	down
PCSK1N	3.08445	4.10389	10.3548	3.83979e-23	1.15072e-21	41.4628	PCSK1N	up
IGSF1	3.27094	6.06119	10.3535	3.88291e-23	1.16305e-21	41.4518	IGSF1	up
AC006058.3	-1.05562	1.76128	-10.3529	3.90411e-23	1.16881e-21	41.4464	AC006058.3	down
AP005205.3	-0.162967	0.0868929	-10.3522	3.92992e-23	1.17595e-21	41.4398	AP005205.3	no
LINC02026	-0.469805	0.510846	-10.3494	4.02558e-23	1.20397e-21	41.416	LINC02026	no
MYO1H	-0.332722	0.319333	-10.3462	4.13984e-23	1.23752e-21	41.3883	MYO1H	no
ITGA2	2.02436	4.32638	10.3434	4.24326e-23	1.26779e-21	41.3639	ITGA2	up
CCDC30	-0.589491	1.40554	-10.339	4.41133e-23	1.31735e-21	41.3255	CCDC30	down
ANKRD27	-0.717126	3.95132	-10.3377	4.4648e-23	1.33264e-21	41.3135	ANKRD27	down
RBMXL1	-0.819228	3.61628	-10.3375	4.47e-23	1.33353e-21	41.3124	RBMXL1	down
RAP2C-AS1	-0.52839	1.17911	-10.3361	4.52539e-23	1.34938e-21	41.3002	RAP2C-AS1	down
AC091214.1	-0.358966	0.401642	-10.3325	4.6701e-23	1.39183e-21	41.269	AC091214.1	no
HKDC1	-1.68984	2.28644	-10.3313	4.72078e-23	1.40622e-21	41.2583	HKDC1	down
AC005696.1	-0.856822	1.40073	-10.3309	4.73835e-23	1.41075e-21	41.2547	AC005696.1	down
PRMT9	-0.907636	3.91176	-10.3304	4.75965e-23	1.41638e-21	41.2502	PRMT9	down
GPR63	-0.419848	0.591762	-10.33	4.77416e-23	1.41999e-21	41.2472	GPR63	no
[truncated: 57,429 more rows]
